# Supplementary material for: Diverse environmental perturbations reveal the evolution and context-dependency of genetic effects on gene expression levels
Source: HighWire-hosted journal article supplement (doi:10.1101/gr.276430.121), 2022-10-13
Supplement: Supplemental_Table_S1.xlsx [file Supplemental_Table_S1.xlsx]

## Sheet: Sheet1
Table S1. List of LCL samples included in this study; sample IDs correspond to those used by the Coriell Institute catalog
Sample_ID	Line_ID	Culture_batch
GM07000	1	2018-04-10
GM12003	2	2018-04-10
HG00130	3	2018-04-10
HG00155	4	2018-04-10
HG00290	5	2018-04-10
HG00304	6	2018-04-10
HG00321	7	2018-04-10
HG00351	8	2018-04-10
HG00379	9	2018-04-10
HG01633	10	2018-04-10
HG01776	11	2018-04-10
HG02466	12	2018-04-10
HG02625	13	2018-04-10
HG02642	14	2018-04-10
HG02771	15	2018-04-10
HG02852	16	2018-04-10
HG02969	17	2018-04-10
HG03050	18	2018-04-10
HG03078	19	2018-04-10
HG03098	20	2018-04-10
HG03111	21	2018-04-10
HG03137	22	2018-04-10
HG03306	23	2018-04-10
HG03354	24	2018-04-10
HG03451	25	2018-04-10
GM12400	26	2018-04-11
GM18881	27	2018-04-11
GM19036	28	2018-04-11
GM19097	29	2018-04-11
GM19118	30	2018-04-11
GM19145	31	2018-04-11
GM19159	32	2018-04-11
GM19307	33	2018-04-11
GM19321	34	2018-04-11
GM19451	35	2018-04-11
GM20529	36	2018-04-11
GM20534	37	2018-04-11
GM20797	38	2018-04-11
GM20799	39	2018-04-11
GM20806	40	2018-04-11
GM20810	41	2018-04-11
GM20831	42	2018-04-11
HG00116	43	2018-04-11
HG00238	44	2018-04-11
HG00264	45	2018-04-11
HG03493	46	2018-04-11
HG03510	47	2018-04-11
HG03563	48	2018-04-11
HG03567	49	2018-04-11
HG03584	50	2018-04-11
GM06989	51	2018-04-24
GM12156	52	2018-04-24
HG00111	53	2018-04-24
HG00135	54	2018-04-24
HG00140	55	2018-04-24
HG00154	56	2018-04-24
HG00179	57	2018-04-24
HG00232	58	2018-04-24
HG00240	59	2018-04-24
HG00260	60	2018-04-24
HG00281	61	2018-04-24
HG00369	62	2018-04-24
HG01512	63	2018-04-24
HG01536	64	2018-04-24
HG01706	65	2018-04-24
HG01770	66	2018-04-24
HG01781	67	2018-04-24
HG02219	68	2018-04-24
HG02563	69	2018-04-24
HG02572	70	2018-04-24
HG02762	71	2018-04-24
HG02809	72	2018-04-24
HG02879	73	2018-04-24
HG02947	74	2018-04-24
HG03173	75	2018-04-24
GM12752	76	2018-04-25
GM12814	77	2018-04-25
GM18484	78	2018-04-25
GM18516	79	2018-04-25
GM19023	80	2018-04-25
GM19026	81	2018-04-25
GM19031	82	2018-04-25
GM19043	83	2018-04-25
GM19128	84	2018-04-25
GM19252	85	2018-04-25
GM19351	86	2018-04-25
GM19437	87	2018-04-25
GM20521	88	2018-04-25
GM20756	89	2018-04-25
GM20798	90	2018-04-25
GM20816	91	2018-04-25
GM20829	92	2018-04-25
HG00105	93	2018-04-25
HG00341	94	2018-04-25
HG02759	95	2018-04-25
HG02938	96	2018-04-25
HG03027	97	2018-04-25
HG03248	98	2018-04-25
HG03399	99	2018-04-25
HG03450	100	2018-04-25
HG00129	101	2018-05-08
HG00131	102	2018-05-08
HG00133	103	2018-05-08
HG00145	104	2018-05-08
HG00156	105	2018-05-08
HG00178	106	2018-05-08
HG00181	107	2018-05-08
HG00309	108	2018-05-08
HG00312	109	2018-05-08
HG00335	110	2018-05-08
HG00358	111	2018-05-08
HG00365	112	2018-05-08
HG01523	113	2018-05-08
HG01526	114	2018-05-08
HG01614	115	2018-05-08
HG01622	116	2018-05-08
HG01703	117	2018-05-08
HG02666	118	2018-05-08
HG02817	119	2018-05-08
HG02861	120	2018-05-08
HG02869	121	2018-05-08
HG02884	122	2018-05-08
HG03105	123	2018-05-08
HG03116	124	2018-05-08
HG03128	125	2018-05-08
GM12832	126	2018-05-09
GM18503	127	2018-05-09
GM18879	128	2018-05-09
GM19350	129	2018-05-09
GM19377	130	2018-05-09
GM19385	131	2018-05-09
GM19391	132	2018-05-09
GM19452	133	2018-05-09
GM20759	134	2018-05-09
GM20760	135	2018-05-09
GM20766	136	2018-05-09
GM20790	137	2018-05-09
GM20813	138	2018-05-09
HG00256	139	2018-05-09
HG03082	140	2018-05-09
HG03117	141	2018-05-09
HG03260	142	2018-05-09
HG03299	143	2018-05-09
HG03341	144	2018-05-09
HG03361	145	2018-05-09
HG03433	146	2018-05-09
HG03446	147	2018-05-09
HG03477	148	2018-05-09
HG03538	149	2018-05-09
HG03569	150	2018-05-09
GM07340	151	2018-05-22
GM12767	152	2018-05-22
HG00249	153	2018-05-22
HG00250	154	2018-05-22
HG00272	155	2018-05-22
HG00288	156	2018-05-22
HG00306	157	2018-05-22
HG00323	158	2018-05-22
HG00343	159	2018-05-22
HG00344	160	2018-05-22
HG00368	161	2018-05-22
HG00376	162	2018-05-22
HG01500	163	2018-05-22
HG01620	164	2018-05-22
HG01625	165	2018-05-22
HG01672	166	2018-05-22
HG01746	167	2018-05-22
HG01768	168	2018-05-22
HG01784	169	2018-05-22
HG02704	170	2018-05-22
HG03057	171	2018-05-22
HG03069	172	2018-05-22
HG03076	173	2018-05-22
HG03120	174	2018-05-22
HG03203	175	2018-05-22
GM12056	176	2018-05-23
GM18519	177	2018-05-23
GM18869	178	2018-05-23
GM18911	179	2018-05-23
GM18934	180	2018-05-23
GM19094	181	2018-05-23
GM19132	182	2018-05-23
GM19223	183	2018-05-23
GM19258	184	2018-05-23
GM19315	185	2018-05-23
GM19395	186	2018-05-23
GM19474	187	2018-05-23
GM20536	188	2018-05-23
GM20771	189	2018-05-23
GM20773	190	2018-05-23
GM20802	191	2018-05-23
GM20807	192	2018-05-23
HG03034	193	2018-05-23
HG03095	194	2018-05-23
HG03100	195	2018-05-23
HG03294	196	2018-05-23
HG03363	197	2018-05-23
HG03381	198	2018-05-23
HG03499	199	2018-05-23
HG03515	200	2018-05-23
GM07048	201	2018-06-05
GM12740	202	2018-06-05
GM12873	203	2018-06-05
GM18485	204	2018-06-05
GM19323	205	2018-06-05
GM19378	206	2018-06-05
GM20532	207	2018-06-05
GM20537	208	2018-06-05
HG00183	209	2018-06-05
HG00254	210	2018-06-05
HG00259	211	2018-06-05
HG00270	212	2018-06-05
HG00384	213	2018-06-05
HG01774	214	2018-06-05
HG02232	215	2018-06-05
HG02675	216	2018-06-05
HG03061	217	2018-06-05
HG03072	218	2018-06-05
HG03251	219	2018-06-05
HG03265	220	2018-06-05
HG03270	221	2018-06-05
HG03401	222	2018-06-05
HG03445	223	2018-06-05
HG03474	224	2018-06-05
HG03577	225	2018-06-05
GM07349	226	2018-06-06
GM18498	227	2018-06-06
GM18506	228	2018-06-06
GM18917	229	2018-06-06
GM19017	230	2018-06-06
GM19044	231	2018-06-06
GM19123	232	2018-06-06
GM19208	233	2018-06-06
GM19393	234	2018-06-06
GM20511	235	2018-06-06
GM20796	236	2018-06-06
GM20803	237	2018-06-06
GM20811	238	2018-06-06
HG00332	239	2018-06-06
HG00353	240	2018-06-06
HG00361	241	2018-06-06
HG00383	242	2018-06-06
HG01628	243	2018-06-06
HG02236	244	2018-06-06
HG02582	245	2018-06-06
HG02589	246	2018-06-06
HG03109	247	2018-06-06
HG03134	248	2018-06-06
HG03305	249	2018-06-06
HG03343	250	2018-06-06
GM10837	251	2018-06-19
GM11933	252	2018-06-19
HG00104	253	2018-06-19
HG00121	254	2018-06-19
HG00152	255	2018-06-19
HG00234	256	2018-06-19
HG00251	257	2018-06-19
HG00360	258	2018-06-19
HG00366	259	2018-06-19
HG00373	260	2018-06-19
HG01519	261	2018-06-19
HG01674	262	2018-06-19
HG01686	263	2018-06-19
HG01700	264	2018-06-19
HG01761	265	2018-06-19
HG02240	266	2018-06-19
HG02612	267	2018-06-19
HG02680	268	2018-06-19
HG02770	269	2018-06-19
HG02800	270	2018-06-19
HG02945	271	2018-06-19
HG02952	272	2018-06-19
HG02971	273	2018-06-19
HG03066	274	2018-06-19
GM10847	275	2018-06-20
GM10856	276	2018-06-20
GM10860	277	2018-06-20
GM18875	278	2018-06-20
GM18876	279	2018-06-20
GM19028	280	2018-06-20
GM19173	281	2018-06-20
GM19318	282	2018-06-20
GM19319	283	2018-06-20
GM19429	284	2018-06-20
GM20522	285	2018-06-20
GM20531	286	2018-06-20
GM20758	287	2018-06-20
GM20800	288	2018-06-20
GM20809	289	2018-06-20
GM20819	290	2018-06-20
GM20828	291	2018-06-20
HG00263	292	2018-06-20
HG03374	293	2018-06-20
HG03390	294	2018-06-20
HG03393	295	2018-06-20
HG03439	296	2018-06-20
HG03458	297	2018-06-20
HG03466	298	2018-06-20
HG03572	299	2018-06-20
GM07037	301	2018-07-17
HG00142	302	2018-07-17
HG00143	303	2018-07-17
HG00150	304	2018-07-17
HG00185	305	2018-07-17
HG00267	306	2018-07-17
HG00327	307	2018-07-17
HG00329	308	2018-07-17
HG00336	309	2018-07-17
HG00382	310	2018-07-17
HG01511	311	2018-07-17
HG01611	312	2018-07-17
HG01678	313	2018-07-17
HG02221	314	2018-07-17
HG02587	315	2018-07-17
HG02613	316	2018-07-17
HG02721	317	2018-07-17
HG02813	318	2018-07-17
HG02895	319	2018-07-17
HG03026	320	2018-07-17
HG03053	321	2018-07-17
HG03168	322	2018-07-17
HG03199	323	2018-07-17
HG03212	324	2018-07-17
HG03224	325	2018-07-17
GM12413	326	2018-07-18
GM18855	327	2018-07-18
GM19146	328	2018-07-18
GM19154	329	2018-07-18
GM19332	330	2018-07-18
GM19360	331	2018-07-18
GM19383	332	2018-07-18
GM20510	333	2018-07-18
GM20517	334	2018-07-18
GM20542	335	2018-07-18
GM20774	336	2018-07-18
GM20792	337	2018-07-18
GM20804	338	2018-07-18
HG03059	339	2018-07-18
HG03311	340	2018-07-18
HG03380	341	2018-07-18
HG03428	342	2018-07-18
HG03432	343	2018-07-18
HG03461	344	2018-07-18
HG03469	345	2018-07-18
HG03470	346	2018-07-18
HG03472	347	2018-07-18
HG03486	348	2018-07-18
HG03521	349	2018-07-18
HG03548	350	2018-07-18
GM12818	351	2018-07-31
HG00101	352	2018-07-31
HG00103	353	2018-07-31
HG00171	354	2018-07-31
HG00246	355	2018-07-31
HG00274	356	2018-07-31
HG00278	357	2018-07-31
HG00310	358	2018-07-31
HG00315	359	2018-07-31
HG00325	360	2018-07-31
HG00350	361	2018-07-31
HG00364	362	2018-07-31
HG00367	363	2018-07-31
HG00372	364	2018-07-31
HG01504	365	2018-07-31
HG01529	366	2018-07-31
HG01605	367	2018-07-31
HG02622	368	2018-07-31
HG02806	369	2018-07-31
HG02887	370	2018-07-31
HG02973	371	2018-07-31
HG03065	372	2018-07-31
HG03104	373	2018-07-31
HG03131	374	2018-07-31
HG03280	375	2018-07-31
GM11881	376	2018-08-01
GM12489	377	2018-08-01
GM18511	378	2018-08-01
GM18854	379	2018-08-01
GM19041	380	2018-08-01
GM19140	381	2018-08-01
GM19225	382	2018-08-01
GM19235	383	2018-08-01
GM19308	384	2018-08-01
GM19371	385	2018-08-01
GM19372	386	2018-08-01
GM19432	387	2018-08-01
GM19448	388	2018-08-01
GM20585	389	2018-08-01
GM20761	390	2018-08-01
GM20783	391	2018-08-01
GM20818	392	2018-08-01
GM20821	393	2018-08-01
GM20822	394	2018-08-01
HG00102	395	2018-08-01
HG03056	396	2018-08-01
HG03351	397	2018-08-01
HG03376	398	2018-08-01
HG03398	399	2018-08-01
HG03456	400	2018-08-01
GM10857	401	2018-08-14
HG00138	402	2018-08-14
HG00146	403	2018-08-14
HG00177	404	2018-08-14
HG00252	405	2018-08-14
HG00257	406	2018-08-14
HG00277	407	2018-08-14
HG00280	408	2018-08-14
HG00311	409	2018-08-14
HG00338	410	2018-08-14
HG00339	411	2018-08-14
HG00378	412	2018-08-14
HG00381	413	2018-08-14
HG01681	414	2018-08-14
HG01695	415	2018-08-14
HG01785	416	2018-08-14
HG01789	417	2018-08-14
HG02224	418	2018-08-14
HG02646	419	2018-08-14
HG02717	420	2018-08-14
HG02836	421	2018-08-14
HG02883	422	2018-08-14
HG03091	423	2018-08-14
HG03194	424	2018-08-14
HG03209	425	2018-08-14
GM12234	426	2018-08-15
GM12249	427	2018-08-15
GM18502	428	2018-08-15
GM18521	429	2018-08-15
GM18872	430	2018-08-15
GM19038	431	2018-08-15
GM19042	432	2018-08-15
GM19109	433	2018-08-15
GM19150	434	2018-08-15
GM19202	435	2018-08-15
GM19203	436	2018-08-15
GM19327	437	2018-08-15
GM19328	438	2018-08-15
GM19346	439	2018-08-15
GM19352	440	2018-08-15
GM19398	441	2018-08-15
GM19475	442	2018-08-15
GM20528	443	2018-08-15
GM20535	444	2018-08-15
GM20827	445	2018-08-15
GM20832	446	2018-08-15
HG00110	447	2018-08-15
HG00282	448	2018-08-15
HG03410	449	2018-08-15
HG03437	450	2018-08-15
GM12335	501	2018-09-18
HG00157	502	2018-09-18
HG00158	503	2018-09-18
HG00189	504	2018-09-18
HG00242	505	2018-09-18
HG00253	506	2018-09-18
HG00268	507	2018-09-18
HG00269	508	2018-09-18
HG00273	509	2018-09-18
HG00285	510	2018-09-18
HG00308	511	2018-09-18
HG00313	512	2018-09-18
HG00319	513	2018-09-18
HG00337	514	2018-09-18
HG00380	515	2018-09-18
HG01608	516	2018-09-18
HG01616	517	2018-09-18
HG01683	518	2018-09-18
HG01697	519	2018-09-18
HG02229	520	2018-09-18
HG02595	521	2018-09-18
HG02854	522	2018-09-18
HG03140	523	2018-09-18
HG03167	524	2018-09-18
HG03171	525	2018-09-18
GM12877	526	2018-09-19
GM18859	527	2018-09-19
GM18915	528	2018-09-19
GM18923	529	2018-09-19
GM19102	530	2018-09-19
GM19115	531	2018-09-19
GM19199	532	2018-09-19
GM19317	533	2018-09-19
GM19320	534	2018-09-19
GM19440	535	2018-09-19
GM20778	536	2018-09-19
GM20801	537	2018-09-19
HG00117	538	2018-09-19
HG02977	539	2018-09-19
HG03040	540	2018-09-19
HG03079	541	2018-09-19
HG03086	542	2018-09-19
HG03088	543	2018-09-19
HG03159	544	2018-09-19
HG03368	545	2018-09-19
HG03371	546	2018-09-19
HG03419	547	2018-09-19
HG03517	548	2018-09-19
HG03549	549	2018-09-19
HG03559	550	2018-09-19
HG00108	551	2018-10-02
HG00187	552	2018-10-02
HG00190	553	2018-10-02
HG00247	554	2018-10-02
HG00262	555	2018-10-02
HG00320	556	2018-10-02
HG00345	557	2018-10-02
HG00357	558	2018-10-02
HG00377	559	2018-10-02
HG01669	560	2018-10-02
HG01765	561	2018-10-02
HG02568	562	2018-10-02
HG02757	563	2018-10-02
HG02811	564	2018-10-02
HG02819	565	2018-10-02
HG02841	566	2018-10-02
HG02892	567	2018-10-02
HG02924	568	2018-10-02
HG02941	569	2018-10-02
HG02965	570	2018-10-02
HG02981	571	2018-10-02
HG02984	572	2018-10-02
HG03074	573	2018-10-02
HG03189	574	2018-10-02
HG03293	575	2018-10-02
GM18510	576	2018-10-03
GM18864	577	2018-10-03
GM18913	578	2018-10-03
GM19139	579	2018-10-03
GM19189	580	2018-10-03
GM19248	581	2018-10-03
GM19355	582	2018-10-03
GM19380	583	2018-10-03
GM19384	584	2018-10-03
GM20769	585	2018-10-03
GM20772	586	2018-10-03
GM20795	587	2018-10-03
GM20826	588	2018-10-03
HG00107	589	2018-10-03
HG00149	590	2018-10-03
HG03302	591	2018-10-03
HG03408	592	2018-10-03
HG03431	593	2018-10-03
HG03465	594	2018-10-03
HG03565	595	2018-10-03
