# Supplementary material for: Diverse environmental perturbations reveal the evolution and context-dependency of genetic effects on gene expression levels
Source: HighWire-hosted journal article supplement (doi:10.1101/gr.276430.121), 2022-10-13
Supplement: Supplemental_Table_S2.xlsx [file Supplemental_Table_S2.xlsx]

## Sheet: Sheet1
Table S2. Environmental treatments used in experiments
Treatment	Abbreviation	Stock concentration (ng/ul)	Total amount added to cells (ng)	Purchased from
Gardiquimod	GARD	300	1500	Invivogen
Fibroblast–stimulating lipopeptide 1	FSL-1	30	150	Invivogen
Interferon gamma	IFNG	15	75	Abcam
Acrylamide	ACRYL	15	75	Sigma
Perfluorooctanoic acid	PFOA	112.5	562.5	Sigma
Bisphenol A	BPA	6	30	Sigma
Dexamethasone	DEX	392.46	1962.3	Sigma
Insulin like growth factor 1	IGF1	30	150	ThermoFisher
B cell activating factor	BAFF	30	150	STEMCELL Technologies
Tunicamycin	TUNIC	300	1500	Sigma
