# Supplementary material for: Diverse environmental perturbations reveal the evolution and context-dependency of genetic effects on gene expression levels
Source: HighWire-hosted journal article supplement (doi:10.1101/gr.276430.121), 2022-10-13
Supplement: Supplemental_Table_S3.xlsx [file Supplemental_Table_S3.xlsx]

## Sheet: Sheet1
Table S3. Metadata for RNA-seq samples passing filters
Line_ID	Sample_ID	Subject_ID	Culture_batch	Gender	Population	Population2	RNA_seq_ID	Sequencing_batch	Condition_abbreviation
102	HG00131	HG00131	2018-05-08	1	GBR	EUR	1	2	BAFF
102	HG00131	HG00131	2018-05-08	1	GBR	EUR	2	2	DEX
102	HG00131	HG00131	2018-05-08	1	GBR	EUR	3	2	IGF1
104	HG00145	HG00145	2018-05-08	1	GBR	EUR	4	2	GARD
104	HG00145	HG00145	2018-05-08	1	GBR	EUR	5	2	IGF1
104	HG00145	HG00145	2018-05-08	1	GBR	EUR	6	2	TUNIC
104	HG00145	HG00145	2018-05-08	1	GBR	EUR	7	2	H20
108	HG00309	HG00309	2018-05-08	2	FIN	EUR	8	2	BAFF
108	HG00309	HG00309	2018-05-08	2	FIN	EUR	9	2	DEX
108	HG00309	HG00309	2018-05-08	2	FIN	EUR	10	2	ETOH
108	HG00309	HG00309	2018-05-08	2	FIN	EUR	11	2	GARD
108	HG00309	HG00309	2018-05-08	2	FIN	EUR	12	2	IFNG
108	HG00309	HG00309	2018-05-08	2	FIN	EUR	13	2	IGF1
108	HG00309	HG00309	2018-05-08	2	FIN	EUR	14	2	H20
10	HG01633	HG01633	2018-04-10	1	IBS	EUR	15	2	BAFF
110	HG00335	HG00335	2018-05-08	1	FIN	EUR	16	2	BAFF
110	HG00335	HG00335	2018-05-08	1	FIN	EUR	17	2	DEX
110	HG00335	HG00335	2018-05-08	1	FIN	EUR	18	2	ETOH
110	HG00335	HG00335	2018-05-08	1	FIN	EUR	19	2	GARD
110	HG00335	HG00335	2018-05-08	1	FIN	EUR	20	2	IFNG
110	HG00335	HG00335	2018-05-08	1	FIN	EUR	21	2	IGF1
110	HG00335	HG00335	2018-05-08	1	FIN	EUR	22	2	TUNIC
110	HG00335	HG00335	2018-05-08	1	FIN	EUR	23	2	H20
111	HG00358	HG00358	2018-05-08	1	FIN	EUR	24	2	BAFF
111	HG00358	HG00358	2018-05-08	1	FIN	EUR	25	2	ETOH
111	HG00358	HG00358	2018-05-08	1	FIN	EUR	26	2	GARD
111	HG00358	HG00358	2018-05-08	1	FIN	EUR	27	2	IFNG
111	HG00358	HG00358	2018-05-08	1	FIN	EUR	28	2	IGF1
111	HG00358	HG00358	2018-05-08	1	FIN	EUR	29	2	H20
116	HG01622	HG01622	2018-05-08	2	IBS	EUR	30	2	BAFF
116	HG01622	HG01622	2018-05-08	2	IBS	EUR	31	2	DEX
116	HG01622	HG01622	2018-05-08	2	IBS	EUR	32	2	ETOH
116	HG01622	HG01622	2018-05-08	2	IBS	EUR	33	2	GARD
116	HG01622	HG01622	2018-05-08	2	IBS	EUR	34	2	IFNG
116	HG01622	HG01622	2018-05-08	2	IBS	EUR	35	2	TUNIC
116	HG01622	HG01622	2018-05-08	2	IBS	EUR	36	2	H20
117	HG01703	HG01703	2018-05-08	1	IBS	EUR	37	2	BAFF
117	HG01703	HG01703	2018-05-08	1	IBS	EUR	38	2	DEX
117	HG01703	HG01703	2018-05-08	1	IBS	EUR	39	2	ETOH
117	HG01703	HG01703	2018-05-08	1	IBS	EUR	40	2	GARD
117	HG01703	HG01703	2018-05-08	1	IBS	EUR	41	2	IFNG
117	HG01703	HG01703	2018-05-08	1	IBS	EUR	42	2	IGF1
117	HG01703	HG01703	2018-05-08	1	IBS	EUR	43	2	TUNIC
121	HG02869	HG02869	2018-05-08	1	GWD	AFR	44	2	BAFF
121	HG02869	HG02869	2018-05-08	1	GWD	AFR	45	2	DEX
121	HG02869	HG02869	2018-05-08	1	GWD	AFR	46	2	ETOH
121	HG02869	HG02869	2018-05-08	1	GWD	AFR	47	2	GARD
121	HG02869	HG02869	2018-05-08	1	GWD	AFR	48	2	TUNIC
121	HG02869	HG02869	2018-05-08	1	GWD	AFR	49	2	H20
122	HG02884	HG02884	2018-05-08	1	GWD	AFR	50	2	BAFF
122	HG02884	HG02884	2018-05-08	1	GWD	AFR	51	2	DEX
122	HG02884	HG02884	2018-05-08	1	GWD	AFR	52	2	ETOH
122	HG02884	HG02884	2018-05-08	1	GWD	AFR	53	2	GARD
122	HG02884	HG02884	2018-05-08	1	GWD	AFR	54	2	IFNG
122	HG02884	HG02884	2018-05-08	1	GWD	AFR	55	2	IGF1
122	HG02884	HG02884	2018-05-08	1	GWD	AFR	56	2	TUNIC
122	HG02884	HG02884	2018-05-08	1	GWD	AFR	57	2	H20
124	HG03116	HG03116	2018-05-08	2	ESN	AFR	58	2	BAFF
124	HG03116	HG03116	2018-05-08	2	ESN	AFR	59	2	DEX
124	HG03116	HG03116	2018-05-08	2	ESN	AFR	60	2	GARD
124	HG03116	HG03116	2018-05-08	2	ESN	AFR	61	2	IFNG
124	HG03116	HG03116	2018-05-08	2	ESN	AFR	62	2	IGF1
124	HG03116	HG03116	2018-05-08	2	ESN	AFR	63	2	TUNIC
124	HG03116	HG03116	2018-05-08	2	ESN	AFR	64	2	H20
125	HG03128	HG03128	2018-05-08	1	ESN	AFR	65	2	BAFF
125	HG03128	HG03128	2018-05-08	1	ESN	AFR	66	2	DEX
125	HG03128	HG03128	2018-05-08	1	ESN	AFR	67	2	GARD
125	HG03128	HG03128	2018-05-08	1	ESN	AFR	68	2	IFNG
125	HG03128	HG03128	2018-05-08	1	ESN	AFR	69	2	IGF1
125	HG03128	HG03128	2018-05-08	1	ESN	AFR	70	2	TUNIC
125	HG03128	HG03128	2018-05-08	1	ESN	AFR	71	2	H20
126	GM12832	GM12832	2018-05-09	2	CEU	EUR	72	2	BAFF
126	GM12832	GM12832	2018-05-09	2	CEU	EUR	73	2	DEX
126	GM12832	GM12832	2018-05-09	2	CEU	EUR	74	2	ETOH
126	GM12832	GM12832	2018-05-09	2	CEU	EUR	75	2	GARD
126	GM12832	GM12832	2018-05-09	2	CEU	EUR	76	2	IFNG
126	GM12832	GM12832	2018-05-09	2	CEU	EUR	77	2	IGF1
126	GM12832	GM12832	2018-05-09	2	CEU	EUR	78	2	TUNIC
126	GM12832	GM12832	2018-05-09	2	CEU	EUR	79	2	H20
127	GM18503	NA18503	2018-05-09	1	YRI	AFR	80	2	BAFF
127	GM18503	NA18503	2018-05-09	1	YRI	AFR	81	2	DEX
127	GM18503	NA18503	2018-05-09	1	YRI	AFR	82	2	ETOH
127	GM18503	NA18503	2018-05-09	1	YRI	AFR	83	2	GARD
127	GM18503	NA18503	2018-05-09	1	YRI	AFR	84	2	IFNG
127	GM18503	NA18503	2018-05-09	1	YRI	AFR	85	2	IGF1
127	GM18503	NA18503	2018-05-09	1	YRI	AFR	86	2	TUNIC
127	GM18503	NA18503	2018-05-09	1	YRI	AFR	87	2	H20
129	GM19350	NA19350	2018-05-09	1	LWK	AFR	88	2	BAFF
129	GM19350	NA19350	2018-05-09	1	LWK	AFR	89	2	DEX
129	GM19350	NA19350	2018-05-09	1	LWK	AFR	90	2	ETOH
129	GM19350	NA19350	2018-05-09	1	LWK	AFR	91	2	GARD
129	GM19350	NA19350	2018-05-09	1	LWK	AFR	92	2	IFNG
129	GM19350	NA19350	2018-05-09	1	LWK	AFR	93	2	IGF1
129	GM19350	NA19350	2018-05-09	1	LWK	AFR	94	2	H20
12	HG02466	HG02466	2018-04-10	1	GWD	AFR	95	2	DEX
12	HG02466	HG02466	2018-04-10	1	GWD	AFR	96	2	FSL1
12	HG02466	HG02466	2018-04-10	1	GWD	AFR	97	2	TUNIC
130	GM19377	NA19377	2018-05-09	2	LWK	AFR	98	2	BAFF
130	GM19377	NA19377	2018-05-09	2	LWK	AFR	99	2	ETOH
130	GM19377	NA19377	2018-05-09	2	LWK	AFR	100	2	GARD
130	GM19377	NA19377	2018-05-09	2	LWK	AFR	101	2	IFNG
130	GM19377	NA19377	2018-05-09	2	LWK	AFR	102	2	IGF1
130	GM19377	NA19377	2018-05-09	2	LWK	AFR	103	2	H20
133	GM19452	NA19452	2018-05-09	1	LWK	AFR	104	2	BAFF
133	GM19452	NA19452	2018-05-09	1	LWK	AFR	105	2	DEX
133	GM19452	NA19452	2018-05-09	1	LWK	AFR	106	2	ETOH
133	GM19452	NA19452	2018-05-09	1	LWK	AFR	107	2	GARD
133	GM19452	NA19452	2018-05-09	1	LWK	AFR	108	2	IFNG
133	GM19452	NA19452	2018-05-09	1	LWK	AFR	109	2	TUNIC
134	GM20759	NA20759	2018-05-09	1	TSI	EUR	110	2	BAFF
134	GM20759	NA20759	2018-05-09	1	TSI	EUR	111	2	DEX
134	GM20759	NA20759	2018-05-09	1	TSI	EUR	112	2	ETOH
134	GM20759	NA20759	2018-05-09	1	TSI	EUR	113	2	IGF1
134	GM20759	NA20759	2018-05-09	1	TSI	EUR	114	2	TUNIC
134	GM20759	NA20759	2018-05-09	1	TSI	EUR	115	2	H20
135	GM20760	NA20760	2018-05-09	2	TSI	EUR	116	2	DEX
135	GM20760	NA20760	2018-05-09	2	TSI	EUR	117	2	ETOH
135	GM20760	NA20760	2018-05-09	2	TSI	EUR	118	2	IFNG
135	GM20760	NA20760	2018-05-09	2	TSI	EUR	119	2	TUNIC
135	GM20760	NA20760	2018-05-09	2	TSI	EUR	120	2	H20
136	GM20766	NA20766	2018-05-09	2	TSI	EUR	121	2	DEX
136	GM20766	NA20766	2018-05-09	2	TSI	EUR	122	2	ETOH
136	GM20766	NA20766	2018-05-09	2	TSI	EUR	123	2	GARD
136	GM20766	NA20766	2018-05-09	2	TSI	EUR	124	2	IFNG
136	GM20766	NA20766	2018-05-09	2	TSI	EUR	125	2	IGF1
136	GM20766	NA20766	2018-05-09	2	TSI	EUR	126	2	TUNIC
136	GM20766	NA20766	2018-05-09	2	TSI	EUR	127	2	H20
137	GM20790	NA20790	2018-05-09	2	TSI	EUR	128	2	BAFF
137	GM20790	NA20790	2018-05-09	2	TSI	EUR	129	2	DEX
137	GM20790	NA20790	2018-05-09	2	TSI	EUR	130	2	ETOH
137	GM20790	NA20790	2018-05-09	2	TSI	EUR	131	2	GARD
137	GM20790	NA20790	2018-05-09	2	TSI	EUR	132	2	IFNG
137	GM20790	NA20790	2018-05-09	2	TSI	EUR	133	2	IGF1
137	GM20790	NA20790	2018-05-09	2	TSI	EUR	134	2	TUNIC
137	GM20790	NA20790	2018-05-09	2	TSI	EUR	135	2	H20
144	HG03341	HG03341	2018-05-09	2	ESN	AFR	136	2	DEX
144	HG03341	HG03341	2018-05-09	2	ESN	AFR	137	2	ETOH
144	HG03341	HG03341	2018-05-09	2	ESN	AFR	138	2	GARD
144	HG03341	HG03341	2018-05-09	2	ESN	AFR	139	2	IFNG
144	HG03341	HG03341	2018-05-09	2	ESN	AFR	140	2	IGF1
144	HG03341	HG03341	2018-05-09	2	ESN	AFR	141	2	H20
147	HG03446	HG03446	2018-05-09	2	MSL	AFR	142	2	BAFF
147	HG03446	HG03446	2018-05-09	2	MSL	AFR	143	2	DEX
147	HG03446	HG03446	2018-05-09	2	MSL	AFR	144	2	ETOH
147	HG03446	HG03446	2018-05-09	2	MSL	AFR	145	2	GARD
147	HG03446	HG03446	2018-05-09	2	MSL	AFR	146	2	IFNG
147	HG03446	HG03446	2018-05-09	2	MSL	AFR	147	2	IGF1
147	HG03446	HG03446	2018-05-09	2	MSL	AFR	148	2	TUNIC
147	HG03446	HG03446	2018-05-09	2	MSL	AFR	149	2	H20
149	HG03538	HG03538	2018-05-09	1	GWD	AFR	150	2	DEX
149	HG03538	HG03538	2018-05-09	1	GWD	AFR	151	2	ETOH
149	HG03538	HG03538	2018-05-09	1	GWD	AFR	152	2	GARD
149	HG03538	HG03538	2018-05-09	1	GWD	AFR	153	2	IFNG
149	HG03538	HG03538	2018-05-09	1	GWD	AFR	154	2	IGF1
149	HG03538	HG03538	2018-05-09	1	GWD	AFR	155	2	TUNIC
14	HG02642	HG02642	2018-04-10	1	GWD	AFR	156	2	DEX
14	HG02642	HG02642	2018-04-10	1	GWD	AFR	157	2	ETOH
14	HG02642	HG02642	2018-04-10	1	GWD	AFR	158	2	IFNG
14	HG02642	HG02642	2018-04-10	1	GWD	AFR	159	2	H20
151	GM07340	GM07340	2018-05-22	2	CEU	EUR	160	2	BAFF
151	GM07340	GM07340	2018-05-22	2	CEU	EUR	161	2	DEX
151	GM07340	GM07340	2018-05-22	2	CEU	EUR	162	2	IFNG
152	GM12767	GM12767	2018-05-22	2	CEU	EUR	163	2	BAFF
152	GM12767	GM12767	2018-05-22	2	CEU	EUR	164	2	DEX
152	GM12767	GM12767	2018-05-22	2	CEU	EUR	165	2	ETOH
152	GM12767	GM12767	2018-05-22	2	CEU	EUR	166	2	GARD
152	GM12767	GM12767	2018-05-22	2	CEU	EUR	167	2	IFNG
154	HG00250	HG00250	2018-05-22	2	GBR	EUR	168	2	BAFF
154	HG00250	HG00250	2018-05-22	2	GBR	EUR	169	2	DEX
154	HG00250	HG00250	2018-05-22	2	GBR	EUR	170	2	GARD
154	HG00250	HG00250	2018-05-22	2	GBR	EUR	171	2	TUNIC
155	HG00272	HG00272	2018-05-22	2	FIN	EUR	172	2	DEX
155	HG00272	HG00272	2018-05-22	2	FIN	EUR	173	2	ETOH
155	HG00272	HG00272	2018-05-22	2	FIN	EUR	174	2	GARD
155	HG00272	HG00272	2018-05-22	2	FIN	EUR	175	2	IFNG
155	HG00272	HG00272	2018-05-22	2	FIN	EUR	176	2	IGF1
156	HG00288	HG00288	2018-05-22	2	FIN	EUR	177	2	BAFF
156	HG00288	HG00288	2018-05-22	2	FIN	EUR	178	2	DEX
156	HG00288	HG00288	2018-05-22	2	FIN	EUR	179	2	IFNG
156	HG00288	HG00288	2018-05-22	2	FIN	EUR	180	2	IGF1
156	HG00288	HG00288	2018-05-22	2	FIN	EUR	181	2	H20
15	HG02771	HG02771	2018-04-10	1	GWD	AFR	182	2	ETOH
163	HG01500	HG01500	2018-05-22	1	IBS	EUR	183	2	BAFF
163	HG01500	HG01500	2018-05-22	1	IBS	EUR	184	2	DEX
163	HG01500	HG01500	2018-05-22	1	IBS	EUR	185	2	IFNG
163	HG01500	HG01500	2018-05-22	1	IBS	EUR	186	2	IGF1
163	HG01500	HG01500	2018-05-22	1	IBS	EUR	187	2	TUNIC
164	HG01620	HG01620	2018-05-22	2	IBS	EUR	188	2	ETOH
164	HG01620	HG01620	2018-05-22	2	IBS	EUR	189	2	IGF1
164	HG01620	HG01620	2018-05-22	2	IBS	EUR	190	2	H20
16	HG02852	HG02852	2018-04-10	2	GWD	AFR	191	2	DEX
16	HG02852	HG02852	2018-04-10	2	GWD	AFR	192	2	ETOH
16	HG02852	HG02852	2018-04-10	2	GWD	AFR	193	2	FSL1
16	HG02852	HG02852	2018-04-10	2	GWD	AFR	194	2	TUNIC
16	HG02852	HG02852	2018-04-10	2	GWD	AFR	195	2	H20
174	HG03120	HG03120	2018-05-22	1	ESN	AFR	196	2	BAFF
174	HG03120	HG03120	2018-05-22	1	ESN	AFR	197	2	DEX
174	HG03120	HG03120	2018-05-22	1	ESN	AFR	198	2	ETOH
174	HG03120	HG03120	2018-05-22	1	ESN	AFR	199	2	IFNG
174	HG03120	HG03120	2018-05-22	1	ESN	AFR	200	2	IGF1
174	HG03120	HG03120	2018-05-22	1	ESN	AFR	201	2	TUNIC
174	HG03120	HG03120	2018-05-22	1	ESN	AFR	202	2	H20
175	HG03203	HG03203	2018-05-22	2	ESN	AFR	203	2	BAFF
175	HG03203	HG03203	2018-05-22	2	ESN	AFR	204	2	DEX
175	HG03203	HG03203	2018-05-22	2	ESN	AFR	205	2	ETOH
175	HG03203	HG03203	2018-05-22	2	ESN	AFR	206	2	GARD
175	HG03203	HG03203	2018-05-22	2	ESN	AFR	207	2	IFNG
175	HG03203	HG03203	2018-05-22	2	ESN	AFR	208	2	IGF1
175	HG03203	HG03203	2018-05-22	2	ESN	AFR	209	2	TUNIC
175	HG03203	HG03203	2018-05-22	2	ESN	AFR	210	2	H20
176	GM12056	GM12056	2018-05-23	1	CEU	EUR	211	2	DEX
176	GM12056	GM12056	2018-05-23	1	CEU	EUR	212	2	GARD
176	GM12056	GM12056	2018-05-23	1	CEU	EUR	213	2	IFNG
177	GM18519	NA18519	2018-05-23	1	YRI	AFR	214	2	BAFF
177	GM18519	NA18519	2018-05-23	1	YRI	AFR	215	2	DEX
177	GM18519	NA18519	2018-05-23	1	YRI	AFR	216	2	ETOH
177	GM18519	NA18519	2018-05-23	1	YRI	AFR	217	2	GARD
177	GM18519	NA18519	2018-05-23	1	YRI	AFR	218	2	IFNG
177	GM18519	NA18519	2018-05-23	1	YRI	AFR	219	2	IGF1
177	GM18519	NA18519	2018-05-23	1	YRI	AFR	220	2	TUNIC
177	GM18519	NA18519	2018-05-23	1	YRI	AFR	221	2	H20
179	GM18911	NA18911	2018-05-23	1	YRI	AFR	222	2	BAFF
179	GM18911	NA18911	2018-05-23	1	YRI	AFR	223	2	DEX
179	GM18911	NA18911	2018-05-23	1	YRI	AFR	224	2	ETOH
179	GM18911	NA18911	2018-05-23	1	YRI	AFR	225	2	GARD
179	GM18911	NA18911	2018-05-23	1	YRI	AFR	226	2	IFNG
179	GM18911	NA18911	2018-05-23	1	YRI	AFR	227	2	IGF1
179	GM18911	NA18911	2018-05-23	1	YRI	AFR	228	2	TUNIC
179	GM18911	NA18911	2018-05-23	1	YRI	AFR	229	2	H20
17	HG02969	HG02969	2018-04-10	2	ESN	AFR	230	2	DEX
17	HG02969	HG02969	2018-04-10	2	ESN	AFR	231	2	ETOH
17	HG02969	HG02969	2018-04-10	2	ESN	AFR	232	2	GARD
17	HG02969	HG02969	2018-04-10	2	ESN	AFR	233	2	IFNG
180	GM18934	NA18934	2018-05-23	1	YRI	AFR	234	2	BAFF
180	GM18934	NA18934	2018-05-23	1	YRI	AFR	235	2	DEX
180	GM18934	NA18934	2018-05-23	1	YRI	AFR	236	2	ETOH
180	GM18934	NA18934	2018-05-23	1	YRI	AFR	237	2	GARD
180	GM18934	NA18934	2018-05-23	1	YRI	AFR	238	2	IFNG
180	GM18934	NA18934	2018-05-23	1	YRI	AFR	239	2	IGF1
180	GM18934	NA18934	2018-05-23	1	YRI	AFR	240	2	TUNIC
180	GM18934	NA18934	2018-05-23	1	YRI	AFR	241	2	H20
181	GM19094	NA19094	2018-05-23	2	YRI	AFR	242	2	BAFF
181	GM19094	NA19094	2018-05-23	2	YRI	AFR	243	2	DEX
181	GM19094	NA19094	2018-05-23	2	YRI	AFR	244	2	ETOH
181	GM19094	NA19094	2018-05-23	2	YRI	AFR	245	2	GARD
181	GM19094	NA19094	2018-05-23	2	YRI	AFR	246	2	IFNG
181	GM19094	NA19094	2018-05-23	2	YRI	AFR	247	2	IGF1
181	GM19094	NA19094	2018-05-23	2	YRI	AFR	248	2	TUNIC
181	GM19094	NA19094	2018-05-23	2	YRI	AFR	249	2	H20
183	GM19223	NA19223	2018-05-23	1	YRI	AFR	250	2	ETOH
183	GM19223	NA19223	2018-05-23	1	YRI	AFR	251	2	GARD
183	GM19223	NA19223	2018-05-23	1	YRI	AFR	252	2	IGF1
183	GM19223	NA19223	2018-05-23	1	YRI	AFR	253	2	TUNIC
183	GM19223	NA19223	2018-05-23	1	YRI	AFR	254	2	H20
184	GM19258	NA19258	2018-05-23	1	YRI	AFR	255	2	DEX
184	GM19258	NA19258	2018-05-23	1	YRI	AFR	256	2	GARD
184	GM19258	NA19258	2018-05-23	1	YRI	AFR	257	2	IFNG
184	GM19258	NA19258	2018-05-23	1	YRI	AFR	258	2	IGF1
185	GM19315	NA19315	2018-05-23	2	LWK	AFR	259	2	BAFF
185	GM19315	NA19315	2018-05-23	2	LWK	AFR	260	2	DEX
185	GM19315	NA19315	2018-05-23	2	LWK	AFR	261	2	ETOH
185	GM19315	NA19315	2018-05-23	2	LWK	AFR	262	2	GARD
185	GM19315	NA19315	2018-05-23	2	LWK	AFR	263	2	IFNG
185	GM19315	NA19315	2018-05-23	2	LWK	AFR	264	2	IGF1
185	GM19315	NA19315	2018-05-23	2	LWK	AFR	265	2	TUNIC
185	GM19315	NA19315	2018-05-23	2	LWK	AFR	266	2	H20
186	GM19395	NA19395	2018-05-23	2	LWK	AFR	267	2	DEX
186	GM19395	NA19395	2018-05-23	2	LWK	AFR	268	2	ETOH
186	GM19395	NA19395	2018-05-23	2	LWK	AFR	269	2	GARD
186	GM19395	NA19395	2018-05-23	2	LWK	AFR	270	2	IFNG
186	GM19395	NA19395	2018-05-23	2	LWK	AFR	271	2	IGF1
186	GM19395	NA19395	2018-05-23	2	LWK	AFR	272	2	TUNIC
186	GM19395	NA19395	2018-05-23	2	LWK	AFR	273	2	H20
190	GM20773	NA20773	2018-05-23	2	TSI	EUR	274	2	BAFF
190	GM20773	NA20773	2018-05-23	2	TSI	EUR	275	2	DEX
190	GM20773	NA20773	2018-05-23	2	TSI	EUR	276	2	ETOH
190	GM20773	NA20773	2018-05-23	2	TSI	EUR	277	2	GARD
190	GM20773	NA20773	2018-05-23	2	TSI	EUR	278	2	IFNG
190	GM20773	NA20773	2018-05-23	2	TSI	EUR	279	2	IGF1
190	GM20773	NA20773	2018-05-23	2	TSI	EUR	280	2	TUNIC
190	GM20773	NA20773	2018-05-23	2	TSI	EUR	281	2	H20
192	GM20807	NA20807	2018-05-23	2	TSI	EUR	282	2	BAFF
192	GM20807	NA20807	2018-05-23	2	TSI	EUR	283	2	DEX
192	GM20807	NA20807	2018-05-23	2	TSI	EUR	284	2	ETOH
192	GM20807	NA20807	2018-05-23	2	TSI	EUR	285	2	GARD
192	GM20807	NA20807	2018-05-23	2	TSI	EUR	286	2	IGF1
192	GM20807	NA20807	2018-05-23	2	TSI	EUR	287	2	TUNIC
192	GM20807	NA20807	2018-05-23	2	TSI	EUR	288	2	H20
193	HG03034	HG03034	2018-05-23	2	GWD	AFR	289	2	ETOH
193	HG03034	HG03034	2018-05-23	2	GWD	AFR	290	2	H20
195	HG03100	HG03100	2018-05-23	1	ESN	AFR	291	2	BAFF
195	HG03100	HG03100	2018-05-23	1	ESN	AFR	292	2	DEX
195	HG03100	HG03100	2018-05-23	1	ESN	AFR	293	2	ETOH
195	HG03100	HG03100	2018-05-23	1	ESN	AFR	294	2	GARD
195	HG03100	HG03100	2018-05-23	1	ESN	AFR	295	2	IFNG
195	HG03100	HG03100	2018-05-23	1	ESN	AFR	296	2	IGF1
195	HG03100	HG03100	2018-05-23	1	ESN	AFR	297	2	TUNIC
195	HG03100	HG03100	2018-05-23	1	ESN	AFR	298	2	H20
199	HG03499	HG03499	2018-05-23	2	ESN	AFR	299	2	BAFF
199	HG03499	HG03499	2018-05-23	2	ESN	AFR	300	2	DEX
199	HG03499	HG03499	2018-05-23	2	ESN	AFR	301	2	ETOH
199	HG03499	HG03499	2018-05-23	2	ESN	AFR	302	2	GARD
199	HG03499	HG03499	2018-05-23	2	ESN	AFR	303	2	IFNG
199	HG03499	HG03499	2018-05-23	2	ESN	AFR	304	2	IGF1
199	HG03499	HG03499	2018-05-23	2	ESN	AFR	305	2	TUNIC
199	HG03499	HG03499	2018-05-23	2	ESN	AFR	306	2	H20
1	GM07000	GM07000	2018-04-10	2	CEU	EUR	307	2	DEX
1	GM07000	GM07000	2018-04-10	2	CEU	EUR	308	2	ETOH
1	GM07000	GM07000	2018-04-10	2	CEU	EUR	309	2	FSL1
1	GM07000	GM07000	2018-04-10	2	CEU	EUR	310	2	IFNG
1	GM07000	GM07000	2018-04-10	2	CEU	EUR	311	2	TUNIC
20	HG03098	HG03098	2018-04-10	1	MSL	AFR	312	2	BAFF
20	HG03098	HG03098	2018-04-10	1	MSL	AFR	313	2	DEX
20	HG03098	HG03098	2018-04-10	1	MSL	AFR	314	2	H20
22	HG03137	HG03137	2018-04-10	1	ESN	AFR	315	2	DEX
22	HG03137	HG03137	2018-04-10	1	ESN	AFR	316	2	FSL1
22	HG03137	HG03137	2018-04-10	1	ESN	AFR	317	2	IFNG
24	HG03354	HG03354	2018-04-10	2	ESN	AFR	318	2	BAFF
24	HG03354	HG03354	2018-04-10	2	ESN	AFR	319	2	DEX
24	HG03354	HG03354	2018-04-10	2	ESN	AFR	320	2	FSL1
24	HG03354	HG03354	2018-04-10	2	ESN	AFR	321	2	GARD
24	HG03354	HG03354	2018-04-10	2	ESN	AFR	322	2	TUNIC
261	HG01519	HG01519	2018-06-19	2	IBS	EUR	323	2	DEX
261	HG01519	HG01519	2018-06-19	2	IBS	EUR	324	2	ETOH
261	HG01519	HG01519	2018-06-19	2	IBS	EUR	325	2	GARD
261	HG01519	HG01519	2018-06-19	2	IBS	EUR	326	2	IFNG
261	HG01519	HG01519	2018-06-19	2	IBS	EUR	327	2	IGF1
261	HG01519	HG01519	2018-06-19	2	IBS	EUR	328	2	H20
267	HG02612	HG02612	2018-06-19	1	GWD	AFR	329	2	BAFF
267	HG02612	HG02612	2018-06-19	1	GWD	AFR	330	2	DEX
267	HG02612	HG02612	2018-06-19	1	GWD	AFR	331	2	ETOH
267	HG02612	HG02612	2018-06-19	1	GWD	AFR	332	2	GARD
267	HG02612	HG02612	2018-06-19	1	GWD	AFR	333	2	IFNG
267	HG02612	HG02612	2018-06-19	1	GWD	AFR	334	2	IGF1
267	HG02612	HG02612	2018-06-19	1	GWD	AFR	335	2	TUNIC
267	HG02612	HG02612	2018-06-19	1	GWD	AFR	336	2	H20
269	HG02770	HG02770	2018-06-19	2	GWD	AFR	337	2	DEX
269	HG02770	HG02770	2018-06-19	2	GWD	AFR	338	2	ETOH
269	HG02770	HG02770	2018-06-19	2	GWD	AFR	339	2	IFNG
269	HG02770	HG02770	2018-06-19	2	GWD	AFR	340	2	IGF1
270	HG02800	HG02800	2018-06-19	1	GWD	AFR	341	2	BAFF
270	HG02800	HG02800	2018-06-19	1	GWD	AFR	342	2	DEX
270	HG02800	HG02800	2018-06-19	1	GWD	AFR	343	2	GARD
270	HG02800	HG02800	2018-06-19	1	GWD	AFR	344	2	IFNG
270	HG02800	HG02800	2018-06-19	1	GWD	AFR	345	2	IGF1
270	HG02800	HG02800	2018-06-19	1	GWD	AFR	346	2	TUNIC
270	HG02800	HG02800	2018-06-19	1	GWD	AFR	347	2	H20
275	GM10847	GM10847	2018-06-20	2	CEU	EUR	348	2	DEX
275	GM10847	GM10847	2018-06-20	2	CEU	EUR	349	2	ETOH
275	GM10847	GM10847	2018-06-20	2	CEU	EUR	350	2	GARD
275	GM10847	GM10847	2018-06-20	2	CEU	EUR	351	2	IGF1
275	GM10847	GM10847	2018-06-20	2	CEU	EUR	352	2	H20
277	GM10860	GM10860	2018-06-20	1	CEU	EUR	353	2	BAFF
277	GM10860	GM10860	2018-06-20	1	CEU	EUR	354	2	DEX
277	GM10860	GM10860	2018-06-20	1	CEU	EUR	355	2	IFNG
277	GM10860	GM10860	2018-06-20	1	CEU	EUR	356	2	IGF1
277	GM10860	GM10860	2018-06-20	1	CEU	EUR	357	2	TUNIC
277	GM10860	GM10860	2018-06-20	1	CEU	EUR	358	2	H20
278	GM18875	NA18875	2018-06-20	2	YRI	AFR	359	2	BAFF
278	GM18875	NA18875	2018-06-20	2	YRI	AFR	360	2	DEX
278	GM18875	NA18875	2018-06-20	2	YRI	AFR	361	2	ETOH
278	GM18875	NA18875	2018-06-20	2	YRI	AFR	362	2	GARD
278	GM18875	NA18875	2018-06-20	2	YRI	AFR	363	2	IFNG
278	GM18875	NA18875	2018-06-20	2	YRI	AFR	364	2	IGF1
278	GM18875	NA18875	2018-06-20	2	YRI	AFR	365	2	TUNIC
278	GM18875	NA18875	2018-06-20	2	YRI	AFR	366	2	H20
279	GM18876	NA18876	2018-06-20	2	YRI	AFR	367	2	BAFF
279	GM18876	NA18876	2018-06-20	2	YRI	AFR	368	2	ETOH
279	GM18876	NA18876	2018-06-20	2	YRI	AFR	369	2	IFNG
280	GM19028	NA19028	2018-06-20	1	LWK	AFR	370	2	BAFF
280	GM19028	NA19028	2018-06-20	1	LWK	AFR	371	2	DEX
280	GM19028	NA19028	2018-06-20	1	LWK	AFR	372	2	ETOH
280	GM19028	NA19028	2018-06-20	1	LWK	AFR	373	2	GARD
280	GM19028	NA19028	2018-06-20	1	LWK	AFR	374	2	IFNG
280	GM19028	NA19028	2018-06-20	1	LWK	AFR	375	2	IGF1
280	GM19028	NA19028	2018-06-20	1	LWK	AFR	376	2	TUNIC
280	GM19028	NA19028	2018-06-20	1	LWK	AFR	377	2	H20
281	GM19173	NA19173	2018-06-20	1	YRI	AFR	378	2	BAFF
281	GM19173	NA19173	2018-06-20	1	YRI	AFR	379	2	DEX
281	GM19173	NA19173	2018-06-20	1	YRI	AFR	380	2	ETOH
281	GM19173	NA19173	2018-06-20	1	YRI	AFR	381	2	IFNG
281	GM19173	NA19173	2018-06-20	1	YRI	AFR	382	2	IGF1
281	GM19173	NA19173	2018-06-20	1	YRI	AFR	383	2	H20
282	GM19318	NA19318	2018-06-20	1	LWK	AFR	384	2	BAFF
282	GM19318	NA19318	2018-06-20	1	LWK	AFR	385	2	DEX
282	GM19318	NA19318	2018-06-20	1	LWK	AFR	386	2	ETOH
282	GM19318	NA19318	2018-06-20	1	LWK	AFR	387	2	GARD
282	GM19318	NA19318	2018-06-20	1	LWK	AFR	388	2	IFNG
282	GM19318	NA19318	2018-06-20	1	LWK	AFR	389	2	IGF1
282	GM19318	NA19318	2018-06-20	1	LWK	AFR	390	2	TUNIC
282	GM19318	NA19318	2018-06-20	1	LWK	AFR	391	2	H20
283	GM19319	NA19319	2018-06-20	1	LWK	AFR	392	2	BAFF
283	GM19319	NA19319	2018-06-20	1	LWK	AFR	393	2	DEX
283	GM19319	NA19319	2018-06-20	1	LWK	AFR	394	2	ETOH
283	GM19319	NA19319	2018-06-20	1	LWK	AFR	395	2	GARD
283	GM19319	NA19319	2018-06-20	1	LWK	AFR	396	2	IFNG
283	GM19319	NA19319	2018-06-20	1	LWK	AFR	397	2	IGF1
283	GM19319	NA19319	2018-06-20	1	LWK	AFR	398	2	TUNIC
284	GM19429	NA19429	2018-06-20	1	LWK	AFR	399	2	BAFF
284	GM19429	NA19429	2018-06-20	1	LWK	AFR	400	2	DEX
284	GM19429	NA19429	2018-06-20	1	LWK	AFR	401	2	ETOH
284	GM19429	NA19429	2018-06-20	1	LWK	AFR	402	2	GARD
284	GM19429	NA19429	2018-06-20	1	LWK	AFR	403	2	IFNG
284	GM19429	NA19429	2018-06-20	1	LWK	AFR	404	2	IGF1
284	GM19429	NA19429	2018-06-20	1	LWK	AFR	405	2	TUNIC
284	GM19429	NA19429	2018-06-20	1	LWK	AFR	406	2	H20
286	GM20531	NA20531	2018-06-20	2	TSI	EUR	407	2	BAFF
286	GM20531	NA20531	2018-06-20	2	TSI	EUR	408	2	DEX
286	GM20531	NA20531	2018-06-20	2	TSI	EUR	409	2	ETOH
286	GM20531	NA20531	2018-06-20	2	TSI	EUR	410	2	GARD
286	GM20531	NA20531	2018-06-20	2	TSI	EUR	411	2	IGF1
286	GM20531	NA20531	2018-06-20	2	TSI	EUR	412	2	TUNIC
286	GM20531	NA20531	2018-06-20	2	TSI	EUR	413	2	H20
289	GM20809	NA20809	2018-06-20	1	TSI	EUR	414	2	DEX
289	GM20809	NA20809	2018-06-20	1	TSI	EUR	415	2	IFNG
289	GM20809	NA20809	2018-06-20	1	TSI	EUR	416	2	H20
28	GM19036	NA19036	2018-04-11	2	LWK	AFR	417	2	BAFF
28	GM19036	NA19036	2018-04-11	2	LWK	AFR	418	2	DEX
28	GM19036	NA19036	2018-04-11	2	LWK	AFR	419	2	ETOH
28	GM19036	NA19036	2018-04-11	2	LWK	AFR	420	2	FSL1
28	GM19036	NA19036	2018-04-11	2	LWK	AFR	421	2	GARD
28	GM19036	NA19036	2018-04-11	2	LWK	AFR	422	2	TUNIC
28	GM19036	NA19036	2018-04-11	2	LWK	AFR	423	2	H20
290	GM20819	NA20819	2018-06-20	2	TSI	EUR	424	2	BAFF
290	GM20819	NA20819	2018-06-20	2	TSI	EUR	425	2	DEX
290	GM20819	NA20819	2018-06-20	2	TSI	EUR	426	2	ETOH
290	GM20819	NA20819	2018-06-20	2	TSI	EUR	427	2	GARD
290	GM20819	NA20819	2018-06-20	2	TSI	EUR	428	2	IFNG
290	GM20819	NA20819	2018-06-20	2	TSI	EUR	429	2	IGF1
290	GM20819	NA20819	2018-06-20	2	TSI	EUR	430	2	TUNIC
291	GM20828	NA20828	2018-06-20	2	TSI	EUR	431	2	IFNG
291	GM20828	NA20828	2018-06-20	2	TSI	EUR	432	2	IGF1
291	GM20828	NA20828	2018-06-20	2	TSI	EUR	433	2	TUNIC
293	HG03374	HG03374	2018-06-20	2	ESN	AFR	434	2	DEX
293	HG03374	HG03374	2018-06-20	2	ESN	AFR	435	2	ETOH
293	HG03374	HG03374	2018-06-20	2	ESN	AFR	436	2	GARD
293	HG03374	HG03374	2018-06-20	2	ESN	AFR	437	2	IFNG
293	HG03374	HG03374	2018-06-20	2	ESN	AFR	438	2	IGF1
293	HG03374	HG03374	2018-06-20	2	ESN	AFR	439	2	TUNIC
293	HG03374	HG03374	2018-06-20	2	ESN	AFR	440	2	H20
294	HG03390	HG03390	2018-06-20	1	MSL	AFR	441	2	BAFF
294	HG03390	HG03390	2018-06-20	1	MSL	AFR	442	2	DEX
294	HG03390	HG03390	2018-06-20	1	MSL	AFR	443	2	GARD
294	HG03390	HG03390	2018-06-20	1	MSL	AFR	444	2	IFNG
294	HG03390	HG03390	2018-06-20	1	MSL	AFR	445	2	IGF1
295	HG03393	HG03393	2018-06-20	2	MSL	AFR	446	2	BAFF
295	HG03393	HG03393	2018-06-20	2	MSL	AFR	447	2	DEX
295	HG03393	HG03393	2018-06-20	2	MSL	AFR	448	2	ETOH
295	HG03393	HG03393	2018-06-20	2	MSL	AFR	449	2	GARD
295	HG03393	HG03393	2018-06-20	2	MSL	AFR	450	2	IFNG
295	HG03393	HG03393	2018-06-20	2	MSL	AFR	451	2	IGF1
295	HG03393	HG03393	2018-06-20	2	MSL	AFR	452	2	TUNIC
295	HG03393	HG03393	2018-06-20	2	MSL	AFR	453	2	H20
296	HG03439	HG03439	2018-06-20	1	MSL	AFR	454	2	BAFF
296	HG03439	HG03439	2018-06-20	1	MSL	AFR	455	2	DEX
296	HG03439	HG03439	2018-06-20	1	MSL	AFR	456	2	ETOH
296	HG03439	HG03439	2018-06-20	1	MSL	AFR	457	2	IFNG
296	HG03439	HG03439	2018-06-20	1	MSL	AFR	458	2	IGF1
296	HG03439	HG03439	2018-06-20	1	MSL	AFR	459	2	TUNIC
296	HG03439	HG03439	2018-06-20	1	MSL	AFR	460	2	H20
297	HG03458	HG03458	2018-06-20	2	MSL	AFR	461	2	BAFF
297	HG03458	HG03458	2018-06-20	2	MSL	AFR	462	2	DEX
297	HG03458	HG03458	2018-06-20	2	MSL	AFR	463	2	ETOH
297	HG03458	HG03458	2018-06-20	2	MSL	AFR	464	2	GARD
297	HG03458	HG03458	2018-06-20	2	MSL	AFR	465	2	IFNG
297	HG03458	HG03458	2018-06-20	2	MSL	AFR	466	2	IGF1
297	HG03458	HG03458	2018-06-20	2	MSL	AFR	467	2	H20
298	HG03466	HG03466	2018-06-20	1	MSL	AFR	468	2	BAFF
298	HG03466	HG03466	2018-06-20	1	MSL	AFR	469	2	DEX
298	HG03466	HG03466	2018-06-20	1	MSL	AFR	470	2	GARD
298	HG03466	HG03466	2018-06-20	1	MSL	AFR	471	2	IFNG
298	HG03466	HG03466	2018-06-20	1	MSL	AFR	472	2	IGF1
298	HG03466	HG03466	2018-06-20	1	MSL	AFR	473	2	TUNIC
298	HG03466	HG03466	2018-06-20	1	MSL	AFR	474	2	H20
299	HG03572	HG03572	2018-06-20	2	MSL	AFR	475	2	BAFF
299	HG03572	HG03572	2018-06-20	2	MSL	AFR	476	2	DEX
299	HG03572	HG03572	2018-06-20	2	MSL	AFR	477	2	ETOH
299	HG03572	HG03572	2018-06-20	2	MSL	AFR	478	2	GARD
299	HG03572	HG03572	2018-06-20	2	MSL	AFR	479	2	IGF1
299	HG03572	HG03572	2018-06-20	2	MSL	AFR	480	2	TUNIC
299	HG03572	HG03572	2018-06-20	2	MSL	AFR	481	2	H20
2	GM12003	GM12003	2018-04-10	1	CEU	EUR	482	2	FSL1
301	GM07037	GM07037	2018-07-17	2	CEU	EUR	483	2	ETOH
301	GM07037	GM07037	2018-07-17	2	CEU	EUR	484	2	GARD
301	GM07037	GM07037	2018-07-17	2	CEU	EUR	485	2	IFNG
301	GM07037	GM07037	2018-07-17	2	CEU	EUR	486	2	IGF1
301	GM07037	GM07037	2018-07-17	2	CEU	EUR	487	2	TUNIC
301	GM07037	GM07037	2018-07-17	2	CEU	EUR	488	2	H20
302	HG00142	HG00142	2018-07-17	1	GBR	EUR	489	2	DEX
302	HG00142	HG00142	2018-07-17	1	GBR	EUR	490	2	ETOH
302	HG00142	HG00142	2018-07-17	1	GBR	EUR	491	2	GARD
302	HG00142	HG00142	2018-07-17	1	GBR	EUR	492	2	IFNG
302	HG00142	HG00142	2018-07-17	1	GBR	EUR	493	2	IGF1
302	HG00142	HG00142	2018-07-17	1	GBR	EUR	494	2	H20
305	HG00185	HG00185	2018-07-17	1	FIN	EUR	495	2	BAFF
305	HG00185	HG00185	2018-07-17	1	FIN	EUR	496	2	DEX
305	HG00185	HG00185	2018-07-17	1	FIN	EUR	497	2	ETOH
306	HG00267	HG00267	2018-07-17	1	FIN	EUR	498	2	DEX
306	HG00267	HG00267	2018-07-17	1	FIN	EUR	499	2	ETOH
306	HG00267	HG00267	2018-07-17	1	FIN	EUR	500	2	GARD
306	HG00267	HG00267	2018-07-17	1	FIN	EUR	501	2	IFNG
306	HG00267	HG00267	2018-07-17	1	FIN	EUR	502	2	IGF1
306	HG00267	HG00267	2018-07-17	1	FIN	EUR	503	2	TUNIC
306	HG00267	HG00267	2018-07-17	1	FIN	EUR	504	2	H20
310	HG00382	HG00382	2018-07-17	1	FIN	EUR	505	2	BAFF
310	HG00382	HG00382	2018-07-17	1	FIN	EUR	506	2	ETOH
310	HG00382	HG00382	2018-07-17	1	FIN	EUR	507	2	GARD
310	HG00382	HG00382	2018-07-17	1	FIN	EUR	508	2	IFNG
310	HG00382	HG00382	2018-07-17	1	FIN	EUR	509	2	IGF1
310	HG00382	HG00382	2018-07-17	1	FIN	EUR	510	2	TUNIC
310	HG00382	HG00382	2018-07-17	1	FIN	EUR	511	2	H20
311	HG01511	HG01511	2018-07-17	2	IBS	EUR	512	2	BAFF
311	HG01511	HG01511	2018-07-17	2	IBS	EUR	513	2	DEX
311	HG01511	HG01511	2018-07-17	2	IBS	EUR	514	2	ETOH
311	HG01511	HG01511	2018-07-17	2	IBS	EUR	515	2	IGF1
311	HG01511	HG01511	2018-07-17	2	IBS	EUR	516	2	TUNIC
311	HG01511	HG01511	2018-07-17	2	IBS	EUR	517	2	H20
313	HG01678	HG01678	2018-07-17	1	IBS	EUR	518	2	BAFF
313	HG01678	HG01678	2018-07-17	1	IBS	EUR	519	2	ETOH
313	HG01678	HG01678	2018-07-17	1	IBS	EUR	520	2	GARD
313	HG01678	HG01678	2018-07-17	1	IBS	EUR	521	2	H20
316	HG02613	HG02613	2018-07-17	1	GWD	AFR	522	2	BAFF
316	HG02613	HG02613	2018-07-17	1	GWD	AFR	523	2	DEX
316	HG02613	HG02613	2018-07-17	1	GWD	AFR	524	2	ETOH
316	HG02613	HG02613	2018-07-17	1	GWD	AFR	525	2	GARD
316	HG02613	HG02613	2018-07-17	1	GWD	AFR	526	2	IGF1
316	HG02613	HG02613	2018-07-17	1	GWD	AFR	527	2	H20
317	HG02721	HG02721	2018-07-17	1	GWD	AFR	528	2	BAFF
317	HG02721	HG02721	2018-07-17	1	GWD	AFR	529	2	ETOH
317	HG02721	HG02721	2018-07-17	1	GWD	AFR	530	2	IFNG
317	HG02721	HG02721	2018-07-17	1	GWD	AFR	531	2	IGF1
317	HG02721	HG02721	2018-07-17	1	GWD	AFR	532	2	TUNIC
317	HG02721	HG02721	2018-07-17	1	GWD	AFR	533	2	H20
319	HG02895	HG02895	2018-07-17	1	GWD	AFR	534	2	BAFF
319	HG02895	HG02895	2018-07-17	1	GWD	AFR	535	2	GARD
319	HG02895	HG02895	2018-07-17	1	GWD	AFR	536	2	IFNG
319	HG02895	HG02895	2018-07-17	1	GWD	AFR	537	2	IGF1
319	HG02895	HG02895	2018-07-17	1	GWD	AFR	538	2	H20
31	GM19145	NA19145	2018-04-11	1	YRI	AFR	539	2	BAFF
31	GM19145	NA19145	2018-04-11	1	YRI	AFR	540	2	DEX
31	GM19145	NA19145	2018-04-11	1	YRI	AFR	541	2	ETOH
31	GM19145	NA19145	2018-04-11	1	YRI	AFR	542	2	FSL1
31	GM19145	NA19145	2018-04-11	1	YRI	AFR	543	2	GARD
31	GM19145	NA19145	2018-04-11	1	YRI	AFR	544	2	IFNG
31	GM19145	NA19145	2018-04-11	1	YRI	AFR	545	2	TUNIC
31	GM19145	NA19145	2018-04-11	1	YRI	AFR	546	2	H20
322	HG03168	HG03168	2018-07-17	2	ESN	AFR	547	2	DEX
322	HG03168	HG03168	2018-07-17	2	ESN	AFR	548	2	GARD
322	HG03168	HG03168	2018-07-17	2	ESN	AFR	549	2	IFNG
322	HG03168	HG03168	2018-07-17	2	ESN	AFR	550	2	IGF1
322	HG03168	HG03168	2018-07-17	2	ESN	AFR	551	2	H20
324	HG03212	HG03212	2018-07-17	2	MSL	AFR	552	2	BAFF
324	HG03212	HG03212	2018-07-17	2	MSL	AFR	553	2	DEX
324	HG03212	HG03212	2018-07-17	2	MSL	AFR	554	2	IGF1
324	HG03212	HG03212	2018-07-17	2	MSL	AFR	555	2	TUNIC
324	HG03212	HG03212	2018-07-17	2	MSL	AFR	556	2	H20
326	GM12413	GM12413	2018-07-18	1	CEU	EUR	557	2	BAFF
326	GM12413	GM12413	2018-07-18	1	CEU	EUR	558	2	ETOH
326	GM12413	GM12413	2018-07-18	1	CEU	EUR	559	2	GARD
326	GM12413	GM12413	2018-07-18	1	CEU	EUR	560	2	IGF1
326	GM12413	GM12413	2018-07-18	1	CEU	EUR	561	2	TUNIC
326	GM12413	GM12413	2018-07-18	1	CEU	EUR	562	2	H20
327	GM18855	NA18855	2018-07-18	2	YRI	AFR	563	2	BAFF
327	GM18855	NA18855	2018-07-18	2	YRI	AFR	564	2	DEX
327	GM18855	NA18855	2018-07-18	2	YRI	AFR	565	2	TUNIC
329	GM19154	NA19154	2018-07-18	1	YRI	AFR	566	2	BAFF
329	GM19154	NA19154	2018-07-18	1	YRI	AFR	567	2	DEX
329	GM19154	NA19154	2018-07-18	1	YRI	AFR	568	2	ETOH
329	GM19154	NA19154	2018-07-18	1	YRI	AFR	569	2	GARD
329	GM19154	NA19154	2018-07-18	1	YRI	AFR	570	2	IFNG
329	GM19154	NA19154	2018-07-18	1	YRI	AFR	571	2	IGF1
329	GM19154	NA19154	2018-07-18	1	YRI	AFR	572	2	H20
32	GM19159	NA19159	2018-04-11	2	YRI	AFR	573	2	BAFF
32	GM19159	NA19159	2018-04-11	2	YRI	AFR	574	2	DEX
32	GM19159	NA19159	2018-04-11	2	YRI	AFR	575	2	ETOH
32	GM19159	NA19159	2018-04-11	2	YRI	AFR	576	2	FSL1
32	GM19159	NA19159	2018-04-11	2	YRI	AFR	577	2	GARD
32	GM19159	NA19159	2018-04-11	2	YRI	AFR	578	2	IFNG
32	GM19159	NA19159	2018-04-11	2	YRI	AFR	579	2	TUNIC
32	GM19159	NA19159	2018-04-11	2	YRI	AFR	580	2	H20
330	GM19332	NA19332	2018-07-18	2	LWK	AFR	581	2	DEX
330	GM19332	NA19332	2018-07-18	2	LWK	AFR	582	2	ETOH
330	GM19332	NA19332	2018-07-18	2	LWK	AFR	583	2	GARD
330	GM19332	NA19332	2018-07-18	2	LWK	AFR	584	2	IFNG
330	GM19332	NA19332	2018-07-18	2	LWK	AFR	585	2	IGF1
330	GM19332	NA19332	2018-07-18	2	LWK	AFR	586	2	TUNIC
330	GM19332	NA19332	2018-07-18	2	LWK	AFR	587	2	H20
332	GM19383	NA19383	2018-07-18	1	LWK	AFR	588	2	BAFF
332	GM19383	NA19383	2018-07-18	1	LWK	AFR	589	2	DEX
332	GM19383	NA19383	2018-07-18	1	LWK	AFR	590	2	ETOH
332	GM19383	NA19383	2018-07-18	1	LWK	AFR	591	2	IFNG
332	GM19383	NA19383	2018-07-18	1	LWK	AFR	592	2	TUNIC
332	GM19383	NA19383	2018-07-18	1	LWK	AFR	593	2	H20
339	HG03059	HG03059	2018-07-18	1	MSL	AFR	594	2	BAFF
339	HG03059	HG03059	2018-07-18	1	MSL	AFR	595	2	DEX
339	HG03059	HG03059	2018-07-18	1	MSL	AFR	596	2	ETOH
339	HG03059	HG03059	2018-07-18	1	MSL	AFR	597	2	GARD
339	HG03059	HG03059	2018-07-18	1	MSL	AFR	598	2	IFNG
339	HG03059	HG03059	2018-07-18	1	MSL	AFR	599	2	IGF1
339	HG03059	HG03059	2018-07-18	1	MSL	AFR	600	2	TUNIC
339	HG03059	HG03059	2018-07-18	1	MSL	AFR	601	2	H20
33	GM19307	NA19307	2018-04-11	1	LWK	AFR	602	2	DEX
33	GM19307	NA19307	2018-04-11	1	LWK	AFR	603	2	ETOH
33	GM19307	NA19307	2018-04-11	1	LWK	AFR	604	2	FSL1
33	GM19307	NA19307	2018-04-11	1	LWK	AFR	605	2	GARD
33	GM19307	NA19307	2018-04-11	1	LWK	AFR	606	2	IFNG
33	GM19307	NA19307	2018-04-11	1	LWK	AFR	607	2	TUNIC
33	GM19307	NA19307	2018-04-11	1	LWK	AFR	608	2	H20
340	HG03311	HG03311	2018-07-18	1	ESN	AFR	609	2	BAFF
340	HG03311	HG03311	2018-07-18	1	ESN	AFR	610	2	DEX
340	HG03311	HG03311	2018-07-18	1	ESN	AFR	611	2	ETOH
340	HG03311	HG03311	2018-07-18	1	ESN	AFR	612	2	IFNG
340	HG03311	HG03311	2018-07-18	1	ESN	AFR	613	2	IGF1
340	HG03311	HG03311	2018-07-18	1	ESN	AFR	614	2	TUNIC
340	HG03311	HG03311	2018-07-18	1	ESN	AFR	615	2	H20
346	HG03470	HG03470	2018-07-18	2	MSL	AFR	616	2	BAFF
346	HG03470	HG03470	2018-07-18	2	MSL	AFR	617	2	DEX
346	HG03470	HG03470	2018-07-18	2	MSL	AFR	618	2	ETOH
346	HG03470	HG03470	2018-07-18	2	MSL	AFR	619	2	GARD
346	HG03470	HG03470	2018-07-18	2	MSL	AFR	620	2	IFNG
346	HG03470	HG03470	2018-07-18	2	MSL	AFR	621	2	IGF1
346	HG03470	HG03470	2018-07-18	2	MSL	AFR	622	2	TUNIC
346	HG03470	HG03470	2018-07-18	2	MSL	AFR	623	2	H20
347	HG03472	HG03472	2018-07-18	1	MSL	AFR	624	2	BAFF
347	HG03472	HG03472	2018-07-18	1	MSL	AFR	625	2	DEX
347	HG03472	HG03472	2018-07-18	1	MSL	AFR	626	2	IFNG
347	HG03472	HG03472	2018-07-18	1	MSL	AFR	627	2	IGF1
347	HG03472	HG03472	2018-07-18	1	MSL	AFR	628	2	H20
348	HG03486	HG03486	2018-07-18	2	MSL	AFR	629	2	BAFF
348	HG03486	HG03486	2018-07-18	2	MSL	AFR	630	2	DEX
348	HG03486	HG03486	2018-07-18	2	MSL	AFR	631	2	ETOH
348	HG03486	HG03486	2018-07-18	2	MSL	AFR	632	2	GARD
348	HG03486	HG03486	2018-07-18	2	MSL	AFR	633	2	IGF1
348	HG03486	HG03486	2018-07-18	2	MSL	AFR	634	2	TUNIC
348	HG03486	HG03486	2018-07-18	2	MSL	AFR	635	2	H20
349	HG03521	HG03521	2018-07-18	1	ESN	AFR	636	2	BAFF
349	HG03521	HG03521	2018-07-18	1	ESN	AFR	637	2	DEX
349	HG03521	HG03521	2018-07-18	1	ESN	AFR	638	2	ETOH
349	HG03521	HG03521	2018-07-18	1	ESN	AFR	639	2	GARD
349	HG03521	HG03521	2018-07-18	1	ESN	AFR	640	2	IGF1
349	HG03521	HG03521	2018-07-18	1	ESN	AFR	641	2	TUNIC
349	HG03521	HG03521	2018-07-18	1	ESN	AFR	642	2	H20
34	GM19321	NA19321	2018-04-11	2	LWK	AFR	643	2	BAFF
34	GM19321	NA19321	2018-04-11	2	LWK	AFR	644	2	DEX
34	GM19321	NA19321	2018-04-11	2	LWK	AFR	645	2	FSL1
34	GM19321	NA19321	2018-04-11	2	LWK	AFR	646	2	GARD
34	GM19321	NA19321	2018-04-11	2	LWK	AFR	647	2	IFNG
34	GM19321	NA19321	2018-04-11	2	LWK	AFR	648	2	TUNIC
34	GM19321	NA19321	2018-04-11	2	LWK	AFR	649	2	H20
350	HG03548	HG03548	2018-07-18	2	MSL	AFR	650	2	BAFF
350	HG03548	HG03548	2018-07-18	2	MSL	AFR	651	2	DEX
350	HG03548	HG03548	2018-07-18	2	MSL	AFR	652	2	ETOH
350	HG03548	HG03548	2018-07-18	2	MSL	AFR	653	2	GARD
350	HG03548	HG03548	2018-07-18	2	MSL	AFR	654	2	IFNG
350	HG03548	HG03548	2018-07-18	2	MSL	AFR	655	2	IGF1
350	HG03548	HG03548	2018-07-18	2	MSL	AFR	656	2	TUNIC
350	HG03548	HG03548	2018-07-18	2	MSL	AFR	657	2	H20
351	GM12818	GM12818	2018-07-31	2	CEU	EUR	658	2	BAFF
351	GM12818	GM12818	2018-07-31	2	CEU	EUR	659	2	DEX
351	GM12818	GM12818	2018-07-31	2	CEU	EUR	660	2	ETOH
351	GM12818	GM12818	2018-07-31	2	CEU	EUR	661	2	GARD
351	GM12818	GM12818	2018-07-31	2	CEU	EUR	662	2	IFNG
351	GM12818	GM12818	2018-07-31	2	CEU	EUR	663	2	IGF1
351	GM12818	GM12818	2018-07-31	2	CEU	EUR	664	2	TUNIC
352	HG00101	HG00101	2018-07-31	1	GBR	EUR	665	2	BAFF
352	HG00101	HG00101	2018-07-31	1	GBR	EUR	666	2	DEX
352	HG00101	HG00101	2018-07-31	1	GBR	EUR	667	2	ETOH
352	HG00101	HG00101	2018-07-31	1	GBR	EUR	668	2	GARD
352	HG00101	HG00101	2018-07-31	1	GBR	EUR	669	2	IFNG
352	HG00101	HG00101	2018-07-31	1	GBR	EUR	670	2	IGF1
352	HG00101	HG00101	2018-07-31	1	GBR	EUR	671	2	TUNIC
352	HG00101	HG00101	2018-07-31	1	GBR	EUR	672	2	H20
353	HG00103	HG00103	2018-07-31	1	GBR	EUR	673	2	BAFF
353	HG00103	HG00103	2018-07-31	1	GBR	EUR	674	2	DEX
353	HG00103	HG00103	2018-07-31	1	GBR	EUR	675	2	ETOH
353	HG00103	HG00103	2018-07-31	1	GBR	EUR	676	2	GARD
353	HG00103	HG00103	2018-07-31	1	GBR	EUR	677	2	IFNG
353	HG00103	HG00103	2018-07-31	1	GBR	EUR	678	2	IGF1
353	HG00103	HG00103	2018-07-31	1	GBR	EUR	679	2	H20
354	HG00171	HG00171	2018-07-31	2	FIN	EUR	680	2	BAFF
354	HG00171	HG00171	2018-07-31	2	FIN	EUR	681	2	ETOH
354	HG00171	HG00171	2018-07-31	2	FIN	EUR	682	2	GARD
354	HG00171	HG00171	2018-07-31	2	FIN	EUR	683	2	IFNG
354	HG00171	HG00171	2018-07-31	2	FIN	EUR	684	2	IGF1
354	HG00171	HG00171	2018-07-31	2	FIN	EUR	685	2	H20
355	HG00246	HG00246	2018-07-31	1	GBR	EUR	686	2	BAFF
355	HG00246	HG00246	2018-07-31	1	GBR	EUR	687	2	DEX
355	HG00246	HG00246	2018-07-31	1	GBR	EUR	688	2	ETOH
355	HG00246	HG00246	2018-07-31	1	GBR	EUR	689	2	GARD
355	HG00246	HG00246	2018-07-31	1	GBR	EUR	690	2	IGF1
355	HG00246	HG00246	2018-07-31	1	GBR	EUR	691	2	TUNIC
355	HG00246	HG00246	2018-07-31	1	GBR	EUR	692	2	H20
356	HG00274	HG00274	2018-07-31	2	FIN	EUR	693	2	DEX
356	HG00274	HG00274	2018-07-31	2	FIN	EUR	694	2	ETOH
356	HG00274	HG00274	2018-07-31	2	FIN	EUR	695	2	GARD
356	HG00274	HG00274	2018-07-31	2	FIN	EUR	696	2	IFNG
356	HG00274	HG00274	2018-07-31	2	FIN	EUR	697	2	IGF1
356	HG00274	HG00274	2018-07-31	2	FIN	EUR	698	2	TUNIC
356	HG00274	HG00274	2018-07-31	2	FIN	EUR	699	2	H20
358	HG00310	HG00310	2018-07-31	1	FIN	EUR	700	2	BAFF
358	HG00310	HG00310	2018-07-31	1	FIN	EUR	701	2	DEX
358	HG00310	HG00310	2018-07-31	1	FIN	EUR	702	2	ETOH
358	HG00310	HG00310	2018-07-31	1	FIN	EUR	703	2	GARD
358	HG00310	HG00310	2018-07-31	1	FIN	EUR	704	2	IFNG
358	HG00310	HG00310	2018-07-31	1	FIN	EUR	705	2	IGF1
358	HG00310	HG00310	2018-07-31	1	FIN	EUR	706	2	TUNIC
358	HG00310	HG00310	2018-07-31	1	FIN	EUR	707	2	H20
359	HG00315	HG00315	2018-07-31	2	FIN	EUR	708	2	BAFF
359	HG00315	HG00315	2018-07-31	2	FIN	EUR	709	2	DEX
359	HG00315	HG00315	2018-07-31	2	FIN	EUR	710	2	ETOH
359	HG00315	HG00315	2018-07-31	2	FIN	EUR	711	2	GARD
359	HG00315	HG00315	2018-07-31	2	FIN	EUR	712	2	IFNG
359	HG00315	HG00315	2018-07-31	2	FIN	EUR	713	2	IGF1
359	HG00315	HG00315	2018-07-31	2	FIN	EUR	714	2	TUNIC
359	HG00315	HG00315	2018-07-31	2	FIN	EUR	715	2	H20
35	GM19451	NA19451	2018-04-11	1	LWK	AFR	716	2	BAFF
35	GM19451	NA19451	2018-04-11	1	LWK	AFR	717	2	DEX
35	GM19451	NA19451	2018-04-11	1	LWK	AFR	718	2	ETOH
35	GM19451	NA19451	2018-04-11	1	LWK	AFR	719	2	FSL1
35	GM19451	NA19451	2018-04-11	1	LWK	AFR	720	2	GARD
35	GM19451	NA19451	2018-04-11	1	LWK	AFR	721	2	IFNG
35	GM19451	NA19451	2018-04-11	1	LWK	AFR	722	2	TUNIC
35	GM19451	NA19451	2018-04-11	1	LWK	AFR	723	2	H20
360	HG00325	HG00325	2018-07-31	1	FIN	EUR	724	2	BAFF
360	HG00325	HG00325	2018-07-31	1	FIN	EUR	725	2	DEX
360	HG00325	HG00325	2018-07-31	1	FIN	EUR	726	2	ETOH
360	HG00325	HG00325	2018-07-31	1	FIN	EUR	727	2	IFNG
360	HG00325	HG00325	2018-07-31	1	FIN	EUR	728	2	IGF1
360	HG00325	HG00325	2018-07-31	1	FIN	EUR	729	2	TUNIC
360	HG00325	HG00325	2018-07-31	1	FIN	EUR	730	2	H20
361	HG00350	HG00350	2018-07-31	2	FIN	EUR	731	2	BAFF
361	HG00350	HG00350	2018-07-31	2	FIN	EUR	732	2	DEX
361	HG00350	HG00350	2018-07-31	2	FIN	EUR	733	2	ETOH
361	HG00350	HG00350	2018-07-31	2	FIN	EUR	734	2	GARD
361	HG00350	HG00350	2018-07-31	2	FIN	EUR	735	2	IFNG
361	HG00350	HG00350	2018-07-31	2	FIN	EUR	736	2	IGF1
361	HG00350	HG00350	2018-07-31	2	FIN	EUR	737	2	TUNIC
361	HG00350	HG00350	2018-07-31	2	FIN	EUR	738	2	H20
362	HG00364	HG00364	2018-07-31	2	FIN	EUR	739	2	BAFF
362	HG00364	HG00364	2018-07-31	2	FIN	EUR	740	2	DEX
362	HG00364	HG00364	2018-07-31	2	FIN	EUR	741	2	ETOH
362	HG00364	HG00364	2018-07-31	2	FIN	EUR	742	2	GARD
362	HG00364	HG00364	2018-07-31	2	FIN	EUR	743	2	IFNG
362	HG00364	HG00364	2018-07-31	2	FIN	EUR	744	2	IGF1
362	HG00364	HG00364	2018-07-31	2	FIN	EUR	745	2	TUNIC
362	HG00364	HG00364	2018-07-31	2	FIN	EUR	746	2	H20
363	HG00367	HG00367	2018-07-31	2	FIN	EUR	747	2	BAFF
363	HG00367	HG00367	2018-07-31	2	FIN	EUR	748	2	ETOH
363	HG00367	HG00367	2018-07-31	2	FIN	EUR	749	2	GARD
363	HG00367	HG00367	2018-07-31	2	FIN	EUR	750	2	IFNG
363	HG00367	HG00367	2018-07-31	2	FIN	EUR	751	2	IGF1
363	HG00367	HG00367	2018-07-31	2	FIN	EUR	752	2	TUNIC
363	HG00367	HG00367	2018-07-31	2	FIN	EUR	753	2	H20
365	HG01504	HG01504	2018-07-31	2	IBS	EUR	754	2	BAFF
365	HG01504	HG01504	2018-07-31	2	IBS	EUR	755	2	DEX
365	HG01504	HG01504	2018-07-31	2	IBS	EUR	756	2	ETOH
365	HG01504	HG01504	2018-07-31	2	IBS	EUR	757	2	GARD
365	HG01504	HG01504	2018-07-31	2	IBS	EUR	758	2	IFNG
365	HG01504	HG01504	2018-07-31	2	IBS	EUR	759	2	IGF1
365	HG01504	HG01504	2018-07-31	2	IBS	EUR	760	2	TUNIC
365	HG01504	HG01504	2018-07-31	2	IBS	EUR	761	2	H20
367	HG01605	HG01605	2018-07-31	2	IBS	EUR	762	2	BAFF
367	HG01605	HG01605	2018-07-31	2	IBS	EUR	763	2	DEX
367	HG01605	HG01605	2018-07-31	2	IBS	EUR	764	2	ETOH
367	HG01605	HG01605	2018-07-31	2	IBS	EUR	765	2	GARD
367	HG01605	HG01605	2018-07-31	2	IBS	EUR	766	2	IFNG
367	HG01605	HG01605	2018-07-31	2	IBS	EUR	767	2	IGF1
367	HG01605	HG01605	2018-07-31	2	IBS	EUR	768	2	TUNIC
367	HG01605	HG01605	2018-07-31	2	IBS	EUR	769	2	H20
368	HG02622	HG02622	2018-07-31	2	GWD	AFR	770	2	BAFF
368	HG02622	HG02622	2018-07-31	2	GWD	AFR	771	2	DEX
368	HG02622	HG02622	2018-07-31	2	GWD	AFR	772	2	ETOH
368	HG02622	HG02622	2018-07-31	2	GWD	AFR	773	2	GARD
368	HG02622	HG02622	2018-07-31	2	GWD	AFR	774	2	IFNG
368	HG02622	HG02622	2018-07-31	2	GWD	AFR	775	2	IGF1
368	HG02622	HG02622	2018-07-31	2	GWD	AFR	776	2	TUNIC
368	HG02622	HG02622	2018-07-31	2	GWD	AFR	777	2	H20
369	HG02806	HG02806	2018-07-31	2	GWD	AFR	778	2	BAFF
369	HG02806	HG02806	2018-07-31	2	GWD	AFR	779	2	DEX
369	HG02806	HG02806	2018-07-31	2	GWD	AFR	780	2	ETOH
369	HG02806	HG02806	2018-07-31	2	GWD	AFR	781	2	GARD
369	HG02806	HG02806	2018-07-31	2	GWD	AFR	782	2	IFNG
369	HG02806	HG02806	2018-07-31	2	GWD	AFR	783	2	IGF1
369	HG02806	HG02806	2018-07-31	2	GWD	AFR	784	2	TUNIC
369	HG02806	HG02806	2018-07-31	2	GWD	AFR	785	2	H20
370	HG02887	HG02887	2018-07-31	1	GWD	AFR	786	2	DEX
370	HG02887	HG02887	2018-07-31	1	GWD	AFR	787	2	ETOH
370	HG02887	HG02887	2018-07-31	1	GWD	AFR	788	2	IFNG
370	HG02887	HG02887	2018-07-31	1	GWD	AFR	789	2	IGF1
370	HG02887	HG02887	2018-07-31	1	GWD	AFR	790	2	TUNIC
370	HG02887	HG02887	2018-07-31	1	GWD	AFR	791	2	H20
371	HG02973	HG02973	2018-07-31	1	ESN	AFR	792	2	DEX
371	HG02973	HG02973	2018-07-31	1	ESN	AFR	793	2	ETOH
371	HG02973	HG02973	2018-07-31	1	ESN	AFR	794	2	GARD
371	HG02973	HG02973	2018-07-31	1	ESN	AFR	795	2	IFNG
371	HG02973	HG02973	2018-07-31	1	ESN	AFR	796	2	IGF1
371	HG02973	HG02973	2018-07-31	1	ESN	AFR	797	2	TUNIC
371	HG02973	HG02973	2018-07-31	1	ESN	AFR	798	2	H20
372	HG03065	HG03065	2018-07-31	1	MSL	AFR	799	2	IFNG
373	HG03104	HG03104	2018-07-31	2	ESN	AFR	800	2	BAFF
373	HG03104	HG03104	2018-07-31	2	ESN	AFR	801	2	IFNG
377	GM12489	GM12489	2018-08-01	2	CEU	EUR	802	2	BAFF
377	GM12489	GM12489	2018-08-01	2	CEU	EUR	803	2	DEX
377	GM12489	GM12489	2018-08-01	2	CEU	EUR	804	2	GARD
377	GM12489	GM12489	2018-08-01	2	CEU	EUR	805	2	IFNG
377	GM12489	GM12489	2018-08-01	2	CEU	EUR	806	2	IGF1
377	GM12489	GM12489	2018-08-01	2	CEU	EUR	807	2	TUNIC
377	GM12489	GM12489	2018-08-01	2	CEU	EUR	808	2	H20
379	GM18854	NA18854	2018-08-01	1	YRI	AFR	809	2	DEX
379	GM18854	NA18854	2018-08-01	1	YRI	AFR	810	2	ETOH
379	GM18854	NA18854	2018-08-01	1	YRI	AFR	811	2	GARD
379	GM18854	NA18854	2018-08-01	1	YRI	AFR	812	2	IFNG
379	GM18854	NA18854	2018-08-01	1	YRI	AFR	813	2	IGF1
379	GM18854	NA18854	2018-08-01	1	YRI	AFR	814	2	TUNIC
379	GM18854	NA18854	2018-08-01	1	YRI	AFR	815	2	H20
37	GM20534	NA20534	2018-04-11	1	TSI	EUR	816	2	BAFF
37	GM20534	NA20534	2018-04-11	1	TSI	EUR	817	2	DEX
37	GM20534	NA20534	2018-04-11	1	TSI	EUR	818	2	ETOH
37	GM20534	NA20534	2018-04-11	1	TSI	EUR	819	2	FSL1
37	GM20534	NA20534	2018-04-11	1	TSI	EUR	820	2	GARD
37	GM20534	NA20534	2018-04-11	1	TSI	EUR	821	2	IFNG
37	GM20534	NA20534	2018-04-11	1	TSI	EUR	822	2	TUNIC
380	GM19041	NA19041	2018-08-01	1	LWK	AFR	823	2	BAFF
380	GM19041	NA19041	2018-08-01	1	LWK	AFR	824	2	DEX
380	GM19041	NA19041	2018-08-01	1	LWK	AFR	825	2	ETOH
380	GM19041	NA19041	2018-08-01	1	LWK	AFR	826	2	GARD
380	GM19041	NA19041	2018-08-01	1	LWK	AFR	827	2	IFNG
380	GM19041	NA19041	2018-08-01	1	LWK	AFR	828	2	IGF1
380	GM19041	NA19041	2018-08-01	1	LWK	AFR	829	2	TUNIC
380	GM19041	NA19041	2018-08-01	1	LWK	AFR	830	2	H20
381	GM19140	NA19140	2018-08-01	2	YRI	AFR	831	2	BAFF
381	GM19140	NA19140	2018-08-01	2	YRI	AFR	832	2	DEX
381	GM19140	NA19140	2018-08-01	2	YRI	AFR	833	2	ETOH
381	GM19140	NA19140	2018-08-01	2	YRI	AFR	834	2	GARD
381	GM19140	NA19140	2018-08-01	2	YRI	AFR	835	2	IFNG
381	GM19140	NA19140	2018-08-01	2	YRI	AFR	836	2	IGF1
381	GM19140	NA19140	2018-08-01	2	YRI	AFR	837	2	TUNIC
382	GM19225	NA19225	2018-08-01	2	YRI	AFR	838	2	BAFF
382	GM19225	NA19225	2018-08-01	2	YRI	AFR	839	2	DEX
382	GM19225	NA19225	2018-08-01	2	YRI	AFR	840	2	GARD
382	GM19225	NA19225	2018-08-01	2	YRI	AFR	841	2	IGF1
382	GM19225	NA19225	2018-08-01	2	YRI	AFR	842	2	TUNIC
382	GM19225	NA19225	2018-08-01	2	YRI	AFR	843	2	H20
384	GM19308	NA19308	2018-08-01	1	LWK	AFR	844	2	BAFF
384	GM19308	NA19308	2018-08-01	1	LWK	AFR	845	2	DEX
384	GM19308	NA19308	2018-08-01	1	LWK	AFR	846	2	ETOH
384	GM19308	NA19308	2018-08-01	1	LWK	AFR	847	2	GARD
384	GM19308	NA19308	2018-08-01	1	LWK	AFR	848	2	IFNG
384	GM19308	NA19308	2018-08-01	1	LWK	AFR	849	2	IGF1
384	GM19308	NA19308	2018-08-01	1	LWK	AFR	850	2	TUNIC
384	GM19308	NA19308	2018-08-01	1	LWK	AFR	851	2	H20
387	GM19432	NA19432	2018-08-01	2	LWK	AFR	852	2	DEX
387	GM19432	NA19432	2018-08-01	2	LWK	AFR	853	2	GARD
387	GM19432	NA19432	2018-08-01	2	LWK	AFR	854	2	IFNG
387	GM19432	NA19432	2018-08-01	2	LWK	AFR	855	2	IGF1
388	GM19448	NA19448	2018-08-01	1	LWK	AFR	856	2	BAFF
388	GM19448	NA19448	2018-08-01	1	LWK	AFR	857	2	DEX
388	GM19448	NA19448	2018-08-01	1	LWK	AFR	858	2	GARD
388	GM19448	NA19448	2018-08-01	1	LWK	AFR	859	2	IFNG
388	GM19448	NA19448	2018-08-01	1	LWK	AFR	860	2	IGF1
388	GM19448	NA19448	2018-08-01	1	LWK	AFR	861	2	TUNIC
388	GM19448	NA19448	2018-08-01	1	LWK	AFR	862	2	H20
38	GM20797	NA20797	2018-04-11	2	TSI	EUR	863	2	DEX
38	GM20797	NA20797	2018-04-11	2	TSI	EUR	864	2	ETOH
38	GM20797	NA20797	2018-04-11	2	TSI	EUR	865	2	FSL1
38	GM20797	NA20797	2018-04-11	2	TSI	EUR	866	2	GARD
38	GM20797	NA20797	2018-04-11	2	TSI	EUR	867	2	TUNIC
38	GM20797	NA20797	2018-04-11	2	TSI	EUR	868	2	H20
391	GM20783	NA20783	2018-08-01	1	TSI	EUR	869	2	BAFF
391	GM20783	NA20783	2018-08-01	1	TSI	EUR	870	2	DEX
391	GM20783	NA20783	2018-08-01	1	TSI	EUR	871	2	ETOH
391	GM20783	NA20783	2018-08-01	1	TSI	EUR	872	2	GARD
391	GM20783	NA20783	2018-08-01	1	TSI	EUR	873	2	IFNG
391	GM20783	NA20783	2018-08-01	1	TSI	EUR	874	2	IGF1
391	GM20783	NA20783	2018-08-01	1	TSI	EUR	875	2	TUNIC
391	GM20783	NA20783	2018-08-01	1	TSI	EUR	876	2	H20
392	GM20818	NA20818	2018-08-01	2	TSI	EUR	877	2	BAFF
392	GM20818	NA20818	2018-08-01	2	TSI	EUR	878	2	DEX
392	GM20818	NA20818	2018-08-01	2	TSI	EUR	879	2	ETOH
392	GM20818	NA20818	2018-08-01	2	TSI	EUR	880	2	GARD
392	GM20818	NA20818	2018-08-01	2	TSI	EUR	881	2	IFNG
392	GM20818	NA20818	2018-08-01	2	TSI	EUR	882	2	IGF1
392	GM20818	NA20818	2018-08-01	2	TSI	EUR	883	2	TUNIC
392	GM20818	NA20818	2018-08-01	2	TSI	EUR	884	2	H20
393	GM20821	NA20821	2018-08-01	2	TSI	EUR	885	2	BAFF
393	GM20821	NA20821	2018-08-01	2	TSI	EUR	886	2	DEX
393	GM20821	NA20821	2018-08-01	2	TSI	EUR	887	2	ETOH
393	GM20821	NA20821	2018-08-01	2	TSI	EUR	888	2	GARD
393	GM20821	NA20821	2018-08-01	2	TSI	EUR	889	2	IFNG
393	GM20821	NA20821	2018-08-01	2	TSI	EUR	890	2	IGF1
393	GM20821	NA20821	2018-08-01	2	TSI	EUR	891	2	TUNIC
393	GM20821	NA20821	2018-08-01	2	TSI	EUR	892	2	H20
394	GM20822	NA20822	2018-08-01	2	TSI	EUR	893	2	BAFF
394	GM20822	NA20822	2018-08-01	2	TSI	EUR	894	2	DEX
394	GM20822	NA20822	2018-08-01	2	TSI	EUR	895	2	ETOH
394	GM20822	NA20822	2018-08-01	2	TSI	EUR	896	2	GARD
394	GM20822	NA20822	2018-08-01	2	TSI	EUR	897	2	IFNG
394	GM20822	NA20822	2018-08-01	2	TSI	EUR	898	2	IGF1
394	GM20822	NA20822	2018-08-01	2	TSI	EUR	899	2	H20
395	HG00102	HG00102	2018-08-01	2	GBR	EUR	900	2	BAFF
395	HG00102	HG00102	2018-08-01	2	GBR	EUR	901	2	DEX
395	HG00102	HG00102	2018-08-01	2	GBR	EUR	902	2	ETOH
395	HG00102	HG00102	2018-08-01	2	GBR	EUR	903	2	GARD
395	HG00102	HG00102	2018-08-01	2	GBR	EUR	904	2	IFNG
395	HG00102	HG00102	2018-08-01	2	GBR	EUR	905	2	IGF1
395	HG00102	HG00102	2018-08-01	2	GBR	EUR	906	2	TUNIC
395	HG00102	HG00102	2018-08-01	2	GBR	EUR	907	2	H20
396	HG03056	HG03056	2018-08-01	1	MSL	AFR	908	2	DEX
396	HG03056	HG03056	2018-08-01	1	MSL	AFR	909	2	ETOH
396	HG03056	HG03056	2018-08-01	1	MSL	AFR	910	2	GARD
396	HG03056	HG03056	2018-08-01	1	MSL	AFR	911	2	IFNG
396	HG03056	HG03056	2018-08-01	1	MSL	AFR	912	2	IGF1
396	HG03056	HG03056	2018-08-01	1	MSL	AFR	913	2	TUNIC
405	HG00252	HG00252	2018-08-14	1	GBR	EUR	914	2	BAFF
405	HG00252	HG00252	2018-08-14	1	GBR	EUR	915	2	DEX
405	HG00252	HG00252	2018-08-14	1	GBR	EUR	916	2	ETOH
405	HG00252	HG00252	2018-08-14	1	GBR	EUR	917	2	GARD
405	HG00252	HG00252	2018-08-14	1	GBR	EUR	918	2	IGF1
405	HG00252	HG00252	2018-08-14	1	GBR	EUR	919	2	H20
406	HG00257	HG00257	2018-08-14	2	GBR	EUR	920	2	ETOH
406	HG00257	HG00257	2018-08-14	2	GBR	EUR	921	2	GARD
406	HG00257	HG00257	2018-08-14	2	GBR	EUR	922	2	IFNG
406	HG00257	HG00257	2018-08-14	2	GBR	EUR	923	2	IGF1
406	HG00257	HG00257	2018-08-14	2	GBR	EUR	924	2	H20
40	GM20806	NA20806	2018-04-11	1	TSI	EUR	925	2	BAFF
40	GM20806	NA20806	2018-04-11	1	TSI	EUR	926	2	DEX
40	GM20806	NA20806	2018-04-11	1	TSI	EUR	927	2	ETOH
40	GM20806	NA20806	2018-04-11	1	TSI	EUR	928	2	FSL1
40	GM20806	NA20806	2018-04-11	1	TSI	EUR	929	2	GARD
40	GM20806	NA20806	2018-04-11	1	TSI	EUR	930	2	IFNG
40	GM20806	NA20806	2018-04-11	1	TSI	EUR	931	2	TUNIC
40	GM20806	NA20806	2018-04-11	1	TSI	EUR	932	2	H20
418	HG02224	HG02224	2018-08-14	1	IBS	EUR	933	2	BAFF
418	HG02224	HG02224	2018-08-14	1	IBS	EUR	934	2	DEX
418	HG02224	HG02224	2018-08-14	1	IBS	EUR	935	2	ETOH
418	HG02224	HG02224	2018-08-14	1	IBS	EUR	936	2	GARD
418	HG02224	HG02224	2018-08-14	1	IBS	EUR	937	2	IFNG
418	HG02224	HG02224	2018-08-14	1	IBS	EUR	938	2	IGF1
418	HG02224	HG02224	2018-08-14	1	IBS	EUR	939	2	TUNIC
418	HG02224	HG02224	2018-08-14	1	IBS	EUR	940	2	H20
419	HG02646	HG02646	2018-08-14	2	GWD	AFR	941	2	BAFF
419	HG02646	HG02646	2018-08-14	2	GWD	AFR	942	2	DEX
419	HG02646	HG02646	2018-08-14	2	GWD	AFR	943	2	ETOH
419	HG02646	HG02646	2018-08-14	2	GWD	AFR	944	2	IFNG
419	HG02646	HG02646	2018-08-14	2	GWD	AFR	945	2	IGF1
419	HG02646	HG02646	2018-08-14	2	GWD	AFR	946	2	TUNIC
419	HG02646	HG02646	2018-08-14	2	GWD	AFR	947	2	H20
41	GM20810	NA20810	2018-04-11	1	TSI	EUR	948	2	BAFF
41	GM20810	NA20810	2018-04-11	1	TSI	EUR	949	2	DEX
41	GM20810	NA20810	2018-04-11	1	TSI	EUR	950	2	ETOH
41	GM20810	NA20810	2018-04-11	1	TSI	EUR	951	2	GARD
41	GM20810	NA20810	2018-04-11	1	TSI	EUR	952	2	IFNG
41	GM20810	NA20810	2018-04-11	1	TSI	EUR	953	2	TUNIC
41	GM20810	NA20810	2018-04-11	1	TSI	EUR	954	2	H20
422	HG02883	HG02883	2018-08-14	1	GWD	AFR	955	2	BAFF
422	HG02883	HG02883	2018-08-14	1	GWD	AFR	956	2	DEX
422	HG02883	HG02883	2018-08-14	1	GWD	AFR	957	2	ETOH
422	HG02883	HG02883	2018-08-14	1	GWD	AFR	958	2	H20
423	HG03091	HG03091	2018-08-14	2	MSL	AFR	959	2	BAFF
423	HG03091	HG03091	2018-08-14	2	MSL	AFR	960	2	DEX
423	HG03091	HG03091	2018-08-14	2	MSL	AFR	961	2	ETOH
423	HG03091	HG03091	2018-08-14	2	MSL	AFR	962	2	GARD
423	HG03091	HG03091	2018-08-14	2	MSL	AFR	963	2	IFNG
423	HG03091	HG03091	2018-08-14	2	MSL	AFR	964	2	IGF1
423	HG03091	HG03091	2018-08-14	2	MSL	AFR	965	2	TUNIC
423	HG03091	HG03091	2018-08-14	2	MSL	AFR	966	2	H20
424	HG03194	HG03194	2018-08-14	1	ESN	AFR	967	2	BAFF
424	HG03194	HG03194	2018-08-14	1	ESN	AFR	968	2	ETOH
424	HG03194	HG03194	2018-08-14	1	ESN	AFR	969	2	GARD
424	HG03194	HG03194	2018-08-14	1	ESN	AFR	970	2	IFNG
424	HG03194	HG03194	2018-08-14	1	ESN	AFR	971	2	H20
425	HG03209	HG03209	2018-08-14	1	MSL	AFR	972	2	BAFF
425	HG03209	HG03209	2018-08-14	1	MSL	AFR	973	2	DEX
425	HG03209	HG03209	2018-08-14	1	MSL	AFR	974	2	GARD
425	HG03209	HG03209	2018-08-14	1	MSL	AFR	975	2	IGF1
425	HG03209	HG03209	2018-08-14	1	MSL	AFR	976	2	H20
428	GM18502	NA18502	2018-08-15	2	YRI	AFR	977	2	BAFF
428	GM18502	NA18502	2018-08-15	2	YRI	AFR	978	2	DEX
428	GM18502	NA18502	2018-08-15	2	YRI	AFR	979	2	ETOH
428	GM18502	NA18502	2018-08-15	2	YRI	AFR	980	2	IFNG
428	GM18502	NA18502	2018-08-15	2	YRI	AFR	981	2	IGF1
428	GM18502	NA18502	2018-08-15	2	YRI	AFR	982	2	TUNIC
428	GM18502	NA18502	2018-08-15	2	YRI	AFR	983	2	H20
42	GM20831	NA20831	2018-04-11	1	TSI	EUR	984	2	BAFF
42	GM20831	NA20831	2018-04-11	1	TSI	EUR	985	2	DEX
42	GM20831	NA20831	2018-04-11	1	TSI	EUR	986	2	ETOH
42	GM20831	NA20831	2018-04-11	1	TSI	EUR	987	2	FSL1
42	GM20831	NA20831	2018-04-11	1	TSI	EUR	988	2	GARD
42	GM20831	NA20831	2018-04-11	1	TSI	EUR	989	2	IFNG
42	GM20831	NA20831	2018-04-11	1	TSI	EUR	990	2	TUNIC
42	GM20831	NA20831	2018-04-11	1	TSI	EUR	991	2	H20
436	GM19203	NA19203	2018-08-15	1	YRI	AFR	992	2	BAFF
436	GM19203	NA19203	2018-08-15	1	YRI	AFR	993	2	DEX
436	GM19203	NA19203	2018-08-15	1	YRI	AFR	994	2	IFNG
436	GM19203	NA19203	2018-08-15	1	YRI	AFR	995	2	IGF1
436	GM19203	NA19203	2018-08-15	1	YRI	AFR	996	2	TUNIC
436	GM19203	NA19203	2018-08-15	1	YRI	AFR	997	2	H20
43	HG00116	HG00116	2018-04-11	1	GBR	EUR	998	2	H20
441	GM19398	NA19398	2018-08-15	2	LWK	AFR	999	2	BAFF
441	GM19398	NA19398	2018-08-15	2	LWK	AFR	1000	2	DEX
441	GM19398	NA19398	2018-08-15	2	LWK	AFR	1001	2	ETOH
441	GM19398	NA19398	2018-08-15	2	LWK	AFR	1002	2	GARD
441	GM19398	NA19398	2018-08-15	2	LWK	AFR	1003	2	IFNG
441	GM19398	NA19398	2018-08-15	2	LWK	AFR	1004	2	IGF1
441	GM19398	NA19398	2018-08-15	2	LWK	AFR	1005	2	TUNIC
441	GM19398	NA19398	2018-08-15	2	LWK	AFR	1006	2	H20
446	GM20832	NA20832	2018-08-15	2	TSI	EUR	1007	2	BAFF
446	GM20832	NA20832	2018-08-15	2	TSI	EUR	1008	2	DEX
446	GM20832	NA20832	2018-08-15	2	TSI	EUR	1009	2	ETOH
446	GM20832	NA20832	2018-08-15	2	TSI	EUR	1010	2	IFNG
446	GM20832	NA20832	2018-08-15	2	TSI	EUR	1011	2	IGF1
446	GM20832	NA20832	2018-08-15	2	TSI	EUR	1012	2	TUNIC
446	GM20832	NA20832	2018-08-15	2	TSI	EUR	1013	2	H20
44	HG00238	HG00238	2018-04-11	2	GBR	EUR	1014	2	BAFF
44	HG00238	HG00238	2018-04-11	2	GBR	EUR	1015	2	DEX
44	HG00238	HG00238	2018-04-11	2	GBR	EUR	1016	2	ETOH
44	HG00238	HG00238	2018-04-11	2	GBR	EUR	1017	2	FSL1
44	HG00238	HG00238	2018-04-11	2	GBR	EUR	1018	2	GARD
44	HG00238	HG00238	2018-04-11	2	GBR	EUR	1019	2	IFNG
44	HG00238	HG00238	2018-04-11	2	GBR	EUR	1020	2	H20
45	HG00264	HG00264	2018-04-11	1	GBR	EUR	1021	2	BAFF
45	HG00264	HG00264	2018-04-11	1	GBR	EUR	1022	2	ETOH
45	HG00264	HG00264	2018-04-11	1	GBR	EUR	1023	2	FSL1
45	HG00264	HG00264	2018-04-11	1	GBR	EUR	1024	2	GARD
45	HG00264	HG00264	2018-04-11	1	GBR	EUR	1025	2	IFNG
45	HG00264	HG00264	2018-04-11	1	GBR	EUR	1026	2	TUNIC
45	HG00264	HG00264	2018-04-11	1	GBR	EUR	1027	2	H20
46	HG03493	HG03493	2018-04-11	2	ESN	AFR	1028	2	BAFF
46	HG03493	HG03493	2018-04-11	2	ESN	AFR	1029	2	DEX
46	HG03493	HG03493	2018-04-11	2	ESN	AFR	1030	2	ETOH
46	HG03493	HG03493	2018-04-11	2	ESN	AFR	1031	2	FSL1
46	HG03493	HG03493	2018-04-11	2	ESN	AFR	1032	2	GARD
46	HG03493	HG03493	2018-04-11	2	ESN	AFR	1033	2	IFNG
46	HG03493	HG03493	2018-04-11	2	ESN	AFR	1034	2	TUNIC
46	HG03493	HG03493	2018-04-11	2	ESN	AFR	1035	2	H20
47	HG03510	HG03510	2018-04-11	2	ESN	AFR	1036	2	H20
48	HG03563	HG03563	2018-04-11	2	MSL	AFR	1037	2	BAFF
48	HG03563	HG03563	2018-04-11	2	MSL	AFR	1038	2	ETOH
48	HG03563	HG03563	2018-04-11	2	MSL	AFR	1039	2	FSL1
48	HG03563	HG03563	2018-04-11	2	MSL	AFR	1040	2	GARD
48	HG03563	HG03563	2018-04-11	2	MSL	AFR	1041	2	IFNG
48	HG03563	HG03563	2018-04-11	2	MSL	AFR	1042	2	TUNIC
48	HG03563	HG03563	2018-04-11	2	MSL	AFR	1043	2	H20
49	HG03567	HG03567	2018-04-11	2	MSL	AFR	1044	2	BAFF
49	HG03567	HG03567	2018-04-11	2	MSL	AFR	1045	2	DEX
49	HG03567	HG03567	2018-04-11	2	MSL	AFR	1046	2	ETOH
49	HG03567	HG03567	2018-04-11	2	MSL	AFR	1047	2	FSL1
49	HG03567	HG03567	2018-04-11	2	MSL	AFR	1048	2	GARD
49	HG03567	HG03567	2018-04-11	2	MSL	AFR	1049	2	IFNG
49	HG03567	HG03567	2018-04-11	2	MSL	AFR	1050	2	TUNIC
49	HG03567	HG03567	2018-04-11	2	MSL	AFR	1051	2	H20
4	HG00155	HG00155	2018-04-10	1	GBR	EUR	1052	2	BAFF
4	HG00155	HG00155	2018-04-10	1	GBR	EUR	1053	2	ETOH
4	HG00155	HG00155	2018-04-10	1	GBR	EUR	1054	2	IFNG
51	GM06989	GM06989	2018-04-24	2	CEU	EUR	1055	2	BAFF
51	GM06989	GM06989	2018-04-24	2	CEU	EUR	1056	2	ETOH
51	GM06989	GM06989	2018-04-24	2	CEU	EUR	1057	2	FSL1
51	GM06989	GM06989	2018-04-24	2	CEU	EUR	1058	2	GARD
51	GM06989	GM06989	2018-04-24	2	CEU	EUR	1059	2	IFNG
51	GM06989	GM06989	2018-04-24	2	CEU	EUR	1060	2	TUNIC
51	GM06989	GM06989	2018-04-24	2	CEU	EUR	1061	2	H20
52	GM12156	GM12156	2018-04-24	2	CEU	EUR	1062	2	DEX
52	GM12156	GM12156	2018-04-24	2	CEU	EUR	1063	2	ETOH
52	GM12156	GM12156	2018-04-24	2	CEU	EUR	1064	2	FSL1
52	GM12156	GM12156	2018-04-24	2	CEU	EUR	1065	2	GARD
52	GM12156	GM12156	2018-04-24	2	CEU	EUR	1066	2	IFNG
52	GM12156	GM12156	2018-04-24	2	CEU	EUR	1067	2	TUNIC
52	GM12156	GM12156	2018-04-24	2	CEU	EUR	1068	2	H20
53	HG00111	HG00111	2018-04-24	2	GBR	EUR	1069	2	BAFF
53	HG00111	HG00111	2018-04-24	2	GBR	EUR	1070	2	ETOH
53	HG00111	HG00111	2018-04-24	2	GBR	EUR	1071	2	FSL1
53	HG00111	HG00111	2018-04-24	2	GBR	EUR	1072	2	GARD
53	HG00111	HG00111	2018-04-24	2	GBR	EUR	1073	2	H20
54	HG00135	HG00135	2018-04-24	2	GBR	EUR	1074	2	BAFF
54	HG00135	HG00135	2018-04-24	2	GBR	EUR	1075	2	DEX
54	HG00135	HG00135	2018-04-24	2	GBR	EUR	1076	2	GARD
54	HG00135	HG00135	2018-04-24	2	GBR	EUR	1077	2	IFNG
54	HG00135	HG00135	2018-04-24	2	GBR	EUR	1078	2	H20
55	HG00140	HG00140	2018-04-24	1	GBR	EUR	1079	2	BAFF
55	HG00140	HG00140	2018-04-24	1	GBR	EUR	1080	2	DEX
55	HG00140	HG00140	2018-04-24	1	GBR	EUR	1081	2	ETOH
55	HG00140	HG00140	2018-04-24	1	GBR	EUR	1082	2	FSL1
55	HG00140	HG00140	2018-04-24	1	GBR	EUR	1083	2	GARD
55	HG00140	HG00140	2018-04-24	1	GBR	EUR	1084	2	IFNG
55	HG00140	HG00140	2018-04-24	1	GBR	EUR	1085	2	TUNIC
55	HG00140	HG00140	2018-04-24	1	GBR	EUR	1086	2	H20
56	HG00154	HG00154	2018-04-24	2	GBR	EUR	1087	2	BAFF
56	HG00154	HG00154	2018-04-24	2	GBR	EUR	1088	2	DEX
56	HG00154	HG00154	2018-04-24	2	GBR	EUR	1089	2	ETOH
56	HG00154	HG00154	2018-04-24	2	GBR	EUR	1090	2	FSL1
56	HG00154	HG00154	2018-04-24	2	GBR	EUR	1091	2	GARD
56	HG00154	HG00154	2018-04-24	2	GBR	EUR	1092	2	IFNG
56	HG00154	HG00154	2018-04-24	2	GBR	EUR	1093	2	TUNIC
56	HG00154	HG00154	2018-04-24	2	GBR	EUR	1094	2	H20
59	HG00240	HG00240	2018-04-24	2	GBR	EUR	1095	2	DEX
59	HG00240	HG00240	2018-04-24	2	GBR	EUR	1096	2	ETOH
59	HG00240	HG00240	2018-04-24	2	GBR	EUR	1097	2	FSL1
59	HG00240	HG00240	2018-04-24	2	GBR	EUR	1098	2	GARD
59	HG00240	HG00240	2018-04-24	2	GBR	EUR	1099	2	IFNG
59	HG00240	HG00240	2018-04-24	2	GBR	EUR	1100	2	TUNIC
59	HG00240	HG00240	2018-04-24	2	GBR	EUR	1101	2	H20
60	HG00260	HG00260	2018-04-24	1	GBR	EUR	1102	2	BAFF
60	HG00260	HG00260	2018-04-24	1	GBR	EUR	1103	2	DEX
60	HG00260	HG00260	2018-04-24	1	GBR	EUR	1104	2	ETOH
60	HG00260	HG00260	2018-04-24	1	GBR	EUR	1105	2	FSL1
60	HG00260	HG00260	2018-04-24	1	GBR	EUR	1106	2	GARD
60	HG00260	HG00260	2018-04-24	1	GBR	EUR	1107	2	IFNG
60	HG00260	HG00260	2018-04-24	1	GBR	EUR	1108	2	H20
61	HG00281	HG00281	2018-04-24	2	FIN	EUR	1109	2	BAFF
61	HG00281	HG00281	2018-04-24	2	FIN	EUR	1110	2	DEX
61	HG00281	HG00281	2018-04-24	2	FIN	EUR	1111	2	ETOH
61	HG00281	HG00281	2018-04-24	2	FIN	EUR	1112	2	FSL1
61	HG00281	HG00281	2018-04-24	2	FIN	EUR	1113	2	GARD
61	HG00281	HG00281	2018-04-24	2	FIN	EUR	1114	2	IFNG
61	HG00281	HG00281	2018-04-24	2	FIN	EUR	1115	2	TUNIC
61	HG00281	HG00281	2018-04-24	2	FIN	EUR	1116	2	H20
62	HG00369	HG00369	2018-04-24	1	FIN	EUR	1117	2	BAFF
62	HG00369	HG00369	2018-04-24	1	FIN	EUR	1118	2	FSL1
62	HG00369	HG00369	2018-04-24	1	FIN	EUR	1119	2	GARD
62	HG00369	HG00369	2018-04-24	1	FIN	EUR	1120	2	IFNG
62	HG00369	HG00369	2018-04-24	1	FIN	EUR	1121	2	TUNIC
62	HG00369	HG00369	2018-04-24	1	FIN	EUR	1122	2	H20
65	HG01706	HG01706	2018-04-24	2	IBS	EUR	1123	2	BAFF
65	HG01706	HG01706	2018-04-24	2	IBS	EUR	1124	2	DEX
65	HG01706	HG01706	2018-04-24	2	IBS	EUR	1125	2	ETOH
65	HG01706	HG01706	2018-04-24	2	IBS	EUR	1126	2	FSL1
65	HG01706	HG01706	2018-04-24	2	IBS	EUR	1127	2	GARD
65	HG01706	HG01706	2018-04-24	2	IBS	EUR	1128	2	IFNG
65	HG01706	HG01706	2018-04-24	2	IBS	EUR	1129	2	TUNIC
65	HG01706	HG01706	2018-04-24	2	IBS	EUR	1130	2	H20
66	HG01770	HG01770	2018-04-24	2	IBS	EUR	1131	2	DEX
66	HG01770	HG01770	2018-04-24	2	IBS	EUR	1132	2	ETOH
66	HG01770	HG01770	2018-04-24	2	IBS	EUR	1133	2	GARD
66	HG01770	HG01770	2018-04-24	2	IBS	EUR	1134	2	IFNG
67	HG01781	HG01781	2018-04-24	1	IBS	EUR	1135	2	ETOH
67	HG01781	HG01781	2018-04-24	1	IBS	EUR	1136	2	FSL1
67	HG01781	HG01781	2018-04-24	1	IBS	EUR	1137	2	TUNIC
67	HG01781	HG01781	2018-04-24	1	IBS	EUR	1138	2	H20
68	HG02219	HG02219	2018-04-24	1	IBS	EUR	1139	2	BAFF
68	HG02219	HG02219	2018-04-24	1	IBS	EUR	1140	2	DEX
68	HG02219	HG02219	2018-04-24	1	IBS	EUR	1141	2	ETOH
68	HG02219	HG02219	2018-04-24	1	IBS	EUR	1142	2	TUNIC
68	HG02219	HG02219	2018-04-24	1	IBS	EUR	1143	2	H20
69	HG02563	HG02563	2018-04-24	1	GWD	AFR	1144	2	BAFF
69	HG02563	HG02563	2018-04-24	1	GWD	AFR	1145	2	DEX
69	HG02563	HG02563	2018-04-24	1	GWD	AFR	1146	2	ETOH
69	HG02563	HG02563	2018-04-24	1	GWD	AFR	1147	2	FSL1
69	HG02563	HG02563	2018-04-24	1	GWD	AFR	1148	2	GARD
69	HG02563	HG02563	2018-04-24	1	GWD	AFR	1149	2	IFNG
69	HG02563	HG02563	2018-04-24	1	GWD	AFR	1150	2	TUNIC
69	HG02563	HG02563	2018-04-24	1	GWD	AFR	1151	2	H20
6	HG00304	HG00304	2018-04-10	2	FIN	EUR	1152	2	BAFF
6	HG00304	HG00304	2018-04-10	2	FIN	EUR	1153	2	DEX
6	HG00304	HG00304	2018-04-10	2	FIN	EUR	1154	2	ETOH
6	HG00304	HG00304	2018-04-10	2	FIN	EUR	1155	2	TUNIC
6	HG00304	HG00304	2018-04-10	2	FIN	EUR	1156	2	H20
70	HG02572	HG02572	2018-04-24	1	GWD	AFR	1157	2	BAFF
70	HG02572	HG02572	2018-04-24	1	GWD	AFR	1158	2	DEX
70	HG02572	HG02572	2018-04-24	1	GWD	AFR	1159	2	ETOH
70	HG02572	HG02572	2018-04-24	1	GWD	AFR	1160	2	FSL1
70	HG02572	HG02572	2018-04-24	1	GWD	AFR	1161	2	GARD
70	HG02572	HG02572	2018-04-24	1	GWD	AFR	1162	2	IFNG
70	HG02572	HG02572	2018-04-24	1	GWD	AFR	1163	2	H20
71	HG02762	HG02762	2018-04-24	1	GWD	AFR	1164	2	BAFF
71	HG02762	HG02762	2018-04-24	1	GWD	AFR	1165	2	DEX
71	HG02762	HG02762	2018-04-24	1	GWD	AFR	1166	2	ETOH
71	HG02762	HG02762	2018-04-24	1	GWD	AFR	1167	2	FSL1
71	HG02762	HG02762	2018-04-24	1	GWD	AFR	1168	2	GARD
71	HG02762	HG02762	2018-04-24	1	GWD	AFR	1169	2	IFNG
71	HG02762	HG02762	2018-04-24	1	GWD	AFR	1170	2	H20
72	HG02809	HG02809	2018-04-24	2	GWD	AFR	1171	2	BAFF
72	HG02809	HG02809	2018-04-24	2	GWD	AFR	1172	2	ETOH
72	HG02809	HG02809	2018-04-24	2	GWD	AFR	1173	2	FSL1
72	HG02809	HG02809	2018-04-24	2	GWD	AFR	1174	2	GARD
72	HG02809	HG02809	2018-04-24	2	GWD	AFR	1175	2	IFNG
72	HG02809	HG02809	2018-04-24	2	GWD	AFR	1176	2	TUNIC
72	HG02809	HG02809	2018-04-24	2	GWD	AFR	1177	2	H20
73	HG02879	HG02879	2018-04-24	2	GWD	AFR	1178	2	BAFF
73	HG02879	HG02879	2018-04-24	2	GWD	AFR	1179	2	DEX
73	HG02879	HG02879	2018-04-24	2	GWD	AFR	1180	2	ETOH
73	HG02879	HG02879	2018-04-24	2	GWD	AFR	1181	2	FSL1
73	HG02879	HG02879	2018-04-24	2	GWD	AFR	1182	2	GARD
73	HG02879	HG02879	2018-04-24	2	GWD	AFR	1183	2	IFNG
73	HG02879	HG02879	2018-04-24	2	GWD	AFR	1184	2	TUNIC
73	HG02879	HG02879	2018-04-24	2	GWD	AFR	1185	2	H20
75	HG03173	HG03173	2018-04-24	1	ESN	AFR	1186	2	BAFF
75	HG03173	HG03173	2018-04-24	1	ESN	AFR	1187	2	DEX
75	HG03173	HG03173	2018-04-24	1	ESN	AFR	1188	2	ETOH
75	HG03173	HG03173	2018-04-24	1	ESN	AFR	1189	2	FSL1
75	HG03173	HG03173	2018-04-24	1	ESN	AFR	1190	2	GARD
75	HG03173	HG03173	2018-04-24	1	ESN	AFR	1191	2	IFNG
75	HG03173	HG03173	2018-04-24	1	ESN	AFR	1192	2	TUNIC
75	HG03173	HG03173	2018-04-24	1	ESN	AFR	1193	2	H20
76	GM12752	GM12752	2018-04-25	1	CEU	EUR	1194	2	BAFF
76	GM12752	GM12752	2018-04-25	1	CEU	EUR	1195	2	DEX
76	GM12752	GM12752	2018-04-25	1	CEU	EUR	1196	2	ETOH
76	GM12752	GM12752	2018-04-25	1	CEU	EUR	1197	2	FSL1
76	GM12752	GM12752	2018-04-25	1	CEU	EUR	1198	2	GARD
76	GM12752	GM12752	2018-04-25	1	CEU	EUR	1199	2	IFNG
76	GM12752	GM12752	2018-04-25	1	CEU	EUR	1200	2	TUNIC
76	GM12752	GM12752	2018-04-25	1	CEU	EUR	1201	2	H20
77	GM12814	GM12814	2018-04-25	1	CEU	EUR	1202	2	BAFF
77	GM12814	GM12814	2018-04-25	1	CEU	EUR	1203	2	DEX
77	GM12814	GM12814	2018-04-25	1	CEU	EUR	1204	2	ETOH
77	GM12814	GM12814	2018-04-25	1	CEU	EUR	1205	2	FSL1
77	GM12814	GM12814	2018-04-25	1	CEU	EUR	1206	2	H20
79	GM18516	NA18516	2018-04-25	1	YRI	AFR	1207	2	BAFF
79	GM18516	NA18516	2018-04-25	1	YRI	AFR	1208	2	DEX
79	GM18516	NA18516	2018-04-25	1	YRI	AFR	1209	2	ETOH
79	GM18516	NA18516	2018-04-25	1	YRI	AFR	1210	2	FSL1
79	GM18516	NA18516	2018-04-25	1	YRI	AFR	1211	2	GARD
79	GM18516	NA18516	2018-04-25	1	YRI	AFR	1212	2	IFNG
79	GM18516	NA18516	2018-04-25	1	YRI	AFR	1213	2	TUNIC
79	GM18516	NA18516	2018-04-25	1	YRI	AFR	1214	2	H20
7	HG00321	HG00321	2018-04-10	1	FIN	EUR	1215	2	DEX
7	HG00321	HG00321	2018-04-10	1	FIN	EUR	1216	2	ETOH
7	HG00321	HG00321	2018-04-10	1	FIN	EUR	1217	2	FSL1
80	GM19023	NA19023	2018-04-25	2	LWK	AFR	1218	2	BAFF
80	GM19023	NA19023	2018-04-25	2	LWK	AFR	1219	2	DEX
80	GM19023	NA19023	2018-04-25	2	LWK	AFR	1220	2	ETOH
80	GM19023	NA19023	2018-04-25	2	LWK	AFR	1221	2	FSL1
80	GM19023	NA19023	2018-04-25	2	LWK	AFR	1222	2	GARD
80	GM19023	NA19023	2018-04-25	2	LWK	AFR	1223	2	IFNG
84	GM19128	NA19128	2018-04-25	1	YRI	AFR	1224	2	BAFF
84	GM19128	NA19128	2018-04-25	1	YRI	AFR	1225	2	DEX
84	GM19128	NA19128	2018-04-25	1	YRI	AFR	1226	2	FSL1
84	GM19128	NA19128	2018-04-25	1	YRI	AFR	1227	2	IFNG
85	GM19252	NA19252	2018-04-25	1	YRI	AFR	1228	2	BAFF
85	GM19252	NA19252	2018-04-25	1	YRI	AFR	1229	2	DEX
85	GM19252	NA19252	2018-04-25	1	YRI	AFR	1230	2	ETOH
85	GM19252	NA19252	2018-04-25	1	YRI	AFR	1231	2	GARD
85	GM19252	NA19252	2018-04-25	1	YRI	AFR	1232	2	IFNG
85	GM19252	NA19252	2018-04-25	1	YRI	AFR	1233	2	TUNIC
85	GM19252	NA19252	2018-04-25	1	YRI	AFR	1234	2	H20
86	GM19351	NA19351	2018-04-25	2	LWK	AFR	1235	2	BAFF
86	GM19351	NA19351	2018-04-25	2	LWK	AFR	1236	2	DEX
86	GM19351	NA19351	2018-04-25	2	LWK	AFR	1237	2	ETOH
86	GM19351	NA19351	2018-04-25	2	LWK	AFR	1238	2	FSL1
86	GM19351	NA19351	2018-04-25	2	LWK	AFR	1239	2	GARD
86	GM19351	NA19351	2018-04-25	2	LWK	AFR	1240	2	IFNG
86	GM19351	NA19351	2018-04-25	2	LWK	AFR	1241	2	TUNIC
86	GM19351	NA19351	2018-04-25	2	LWK	AFR	1242	2	H20
87	GM19437	NA19437	2018-04-25	2	LWK	AFR	1243	2	BAFF
87	GM19437	NA19437	2018-04-25	2	LWK	AFR	1244	2	IFNG
87	GM19437	NA19437	2018-04-25	2	LWK	AFR	1245	2	TUNIC
89	GM20756	NA20756	2018-04-25	2	TSI	EUR	1246	2	DEX
89	GM20756	NA20756	2018-04-25	2	TSI	EUR	1247	2	ETOH
89	GM20756	NA20756	2018-04-25	2	TSI	EUR	1248	2	FSL1
89	GM20756	NA20756	2018-04-25	2	TSI	EUR	1249	2	IFNG
89	GM20756	NA20756	2018-04-25	2	TSI	EUR	1250	2	TUNIC
8	HG00351	HG00351	2018-04-10	1	FIN	EUR	1251	2	BAFF
8	HG00351	HG00351	2018-04-10	1	FIN	EUR	1252	2	DEX
8	HG00351	HG00351	2018-04-10	1	FIN	EUR	1253	2	ETOH
8	HG00351	HG00351	2018-04-10	1	FIN	EUR	1254	2	FSL1
8	HG00351	HG00351	2018-04-10	1	FIN	EUR	1255	2	GARD
8	HG00351	HG00351	2018-04-10	1	FIN	EUR	1256	2	IFNG
8	HG00351	HG00351	2018-04-10	1	FIN	EUR	1257	2	TUNIC
8	HG00351	HG00351	2018-04-10	1	FIN	EUR	1258	2	H20
90	GM20798	NA20798	2018-04-25	1	TSI	EUR	1259	2	ETOH
90	GM20798	NA20798	2018-04-25	1	TSI	EUR	1260	2	FSL1
90	GM20798	NA20798	2018-04-25	1	TSI	EUR	1261	2	TUNIC
90	GM20798	NA20798	2018-04-25	1	TSI	EUR	1262	2	H20
92	GM20829	NA20829	2018-04-25	1	TSI	EUR	1263	2	BAFF
92	GM20829	NA20829	2018-04-25	1	TSI	EUR	1264	2	DEX
92	GM20829	NA20829	2018-04-25	1	TSI	EUR	1265	2	ETOH
92	GM20829	NA20829	2018-04-25	1	TSI	EUR	1266	2	FSL1
92	GM20829	NA20829	2018-04-25	1	TSI	EUR	1267	2	GARD
92	GM20829	NA20829	2018-04-25	1	TSI	EUR	1268	2	IFNG
92	GM20829	NA20829	2018-04-25	1	TSI	EUR	1269	2	TUNIC
92	GM20829	NA20829	2018-04-25	1	TSI	EUR	1270	2	H20
93	HG00105	HG00105	2018-04-25	1	GBR	EUR	1271	2	BAFF
93	HG00105	HG00105	2018-04-25	1	GBR	EUR	1272	2	DEX
93	HG00105	HG00105	2018-04-25	1	GBR	EUR	1273	2	ETOH
93	HG00105	HG00105	2018-04-25	1	GBR	EUR	1274	2	FSL1
93	HG00105	HG00105	2018-04-25	1	GBR	EUR	1275	2	GARD
93	HG00105	HG00105	2018-04-25	1	GBR	EUR	1276	2	IFNG
93	HG00105	HG00105	2018-04-25	1	GBR	EUR	1277	2	TUNIC
93	HG00105	HG00105	2018-04-25	1	GBR	EUR	1278	2	H20
96	HG02938	HG02938	2018-04-25	1	ESN	AFR	1279	2	BAFF
96	HG02938	HG02938	2018-04-25	1	ESN	AFR	1280	2	DEX
96	HG02938	HG02938	2018-04-25	1	ESN	AFR	1281	2	ETOH
96	HG02938	HG02938	2018-04-25	1	ESN	AFR	1282	2	FSL1
96	HG02938	HG02938	2018-04-25	1	ESN	AFR	1283	2	GARD
96	HG02938	HG02938	2018-04-25	1	ESN	AFR	1284	2	IFNG
96	HG02938	HG02938	2018-04-25	1	ESN	AFR	1285	2	TUNIC
96	HG02938	HG02938	2018-04-25	1	ESN	AFR	1286	2	H20
98	HG03248	HG03248	2018-04-25	1	GWD	AFR	1287	2	BAFF
98	HG03248	HG03248	2018-04-25	1	GWD	AFR	1288	2	DEX
98	HG03248	HG03248	2018-04-25	1	GWD	AFR	1289	2	ETOH
98	HG03248	HG03248	2018-04-25	1	GWD	AFR	1290	2	FSL1
98	HG03248	HG03248	2018-04-25	1	GWD	AFR	1291	2	GARD
98	HG03248	HG03248	2018-04-25	1	GWD	AFR	1292	2	IFNG
98	HG03248	HG03248	2018-04-25	1	GWD	AFR	1293	2	H20
99	HG03399	HG03399	2018-04-25	1	MSL	AFR	1294	2	ETOH
99	HG03399	HG03399	2018-04-25	1	MSL	AFR	1295	2	FSL1
99	HG03399	HG03399	2018-04-25	1	MSL	AFR	1296	2	H20
NA	NA	NA	NA	NA	NA	AFR	1297	2	BAFF
NA	NA	NA	NA	NA	NA	AFR	1298	2	DEX
NA	NA	NA	NA	NA	NA	AFR	1299	2	ETOH
NA	NA	NA	NA	NA	NA	AFR	1300	2	GARD
NA	NA	NA	NA	NA	NA	AFR	1301	2	IFNG
NA	NA	NA	NA	NA	NA	AFR	1302	2	IGF1
NA	NA	NA	NA	NA	NA	AFR	1303	2	TUNIC
NA	NA	NA	NA	NA	NA	AFR	1304	2	H20
101	HG00129	HG00129	2018-05-08	1	GBR	EUR	1305	3	BAFF
101	HG00129	HG00129	2018-05-08	1	GBR	EUR	1306	3	DEX
101	HG00129	HG00129	2018-05-08	1	GBR	EUR	1307	3	ETOH
101	HG00129	HG00129	2018-05-08	1	GBR	EUR	1308	3	GARD
101	HG00129	HG00129	2018-05-08	1	GBR	EUR	1309	3	IFNG
101	HG00129	HG00129	2018-05-08	1	GBR	EUR	1310	3	IGF1
101	HG00129	HG00129	2018-05-08	1	GBR	EUR	1311	3	TUNIC
101	HG00129	HG00129	2018-05-08	1	GBR	EUR	1312	3	H20
103	HG00133	HG00133	2018-05-08	2	GBR	EUR	1313	3	BAFF
103	HG00133	HG00133	2018-05-08	2	GBR	EUR	1314	3	ETOH
103	HG00133	HG00133	2018-05-08	2	GBR	EUR	1315	3	GARD
103	HG00133	HG00133	2018-05-08	2	GBR	EUR	1316	3	IFNG
103	HG00133	HG00133	2018-05-08	2	GBR	EUR	1317	3	IGF1
103	HG00133	HG00133	2018-05-08	2	GBR	EUR	1318	3	TUNIC
103	HG00133	HG00133	2018-05-08	2	GBR	EUR	1319	3	H20
105	HG00156	HG00156	2018-05-08	1	GBR	EUR	1320	3	BAFF
105	HG00156	HG00156	2018-05-08	1	GBR	EUR	1321	3	ETOH
105	HG00156	HG00156	2018-05-08	1	GBR	EUR	1322	3	H20
106	HG00178	HG00178	2018-05-08	2	FIN	EUR	1323	3	BAFF
106	HG00178	HG00178	2018-05-08	2	FIN	EUR	1324	3	DEX
106	HG00178	HG00178	2018-05-08	2	FIN	EUR	1325	3	ETOH
106	HG00178	HG00178	2018-05-08	2	FIN	EUR	1326	3	GARD
106	HG00178	HG00178	2018-05-08	2	FIN	EUR	1327	3	IFNG
106	HG00178	HG00178	2018-05-08	2	FIN	EUR	1328	3	IGF1
106	HG00178	HG00178	2018-05-08	2	FIN	EUR	1329	3	TUNIC
106	HG00178	HG00178	2018-05-08	2	FIN	EUR	1330	3	H20
107	HG00181	HG00181	2018-05-08	1	FIN	EUR	1331	3	DEX
107	HG00181	HG00181	2018-05-08	1	FIN	EUR	1332	3	ETOH
107	HG00181	HG00181	2018-05-08	1	FIN	EUR	1333	3	GARD
107	HG00181	HG00181	2018-05-08	1	FIN	EUR	1334	3	IFNG
107	HG00181	HG00181	2018-05-08	1	FIN	EUR	1335	3	IGF1
107	HG00181	HG00181	2018-05-08	1	FIN	EUR	1336	3	TUNIC
109	HG00312	HG00312	2018-05-08	1	FIN	EUR	1337	3	BAFF
109	HG00312	HG00312	2018-05-08	1	FIN	EUR	1338	3	DEX
109	HG00312	HG00312	2018-05-08	1	FIN	EUR	1339	3	GARD
109	HG00312	HG00312	2018-05-08	1	FIN	EUR	1340	3	IFNG
109	HG00312	HG00312	2018-05-08	1	FIN	EUR	1341	3	IGF1
109	HG00312	HG00312	2018-05-08	1	FIN	EUR	1342	3	H20
112	HG00365	HG00365	2018-05-08	2	FIN	EUR	1343	3	ETOH
112	HG00365	HG00365	2018-05-08	2	FIN	EUR	1344	3	GARD
112	HG00365	HG00365	2018-05-08	2	FIN	EUR	1345	3	IFNG
112	HG00365	HG00365	2018-05-08	2	FIN	EUR	1346	3	IGF1
112	HG00365	HG00365	2018-05-08	2	FIN	EUR	1347	3	TUNIC
112	HG00365	HG00365	2018-05-08	2	FIN	EUR	1348	3	H20
113	HG01523	HG01523	2018-05-08	1	IBS	EUR	1349	3	BAFF
113	HG01523	HG01523	2018-05-08	1	IBS	EUR	1350	3	DEX
113	HG01523	HG01523	2018-05-08	1	IBS	EUR	1351	3	GARD
113	HG01523	HG01523	2018-05-08	1	IBS	EUR	1352	3	IFNG
113	HG01523	HG01523	2018-05-08	1	IBS	EUR	1353	3	IGF1
113	HG01523	HG01523	2018-05-08	1	IBS	EUR	1354	3	TUNIC
114	HG01526	HG01526	2018-05-08	1	IBS	EUR	1355	3	BAFF
114	HG01526	HG01526	2018-05-08	1	IBS	EUR	1356	3	DEX
114	HG01526	HG01526	2018-05-08	1	IBS	EUR	1357	3	ETOH
114	HG01526	HG01526	2018-05-08	1	IBS	EUR	1358	3	IFNG
114	HG01526	HG01526	2018-05-08	1	IBS	EUR	1359	3	IGF1
114	HG01526	HG01526	2018-05-08	1	IBS	EUR	1360	3	TUNIC
114	HG01526	HG01526	2018-05-08	1	IBS	EUR	1361	3	H20
115	HG01614	HG01614	2018-05-08	2	IBS	EUR	1362	3	DEX
115	HG01614	HG01614	2018-05-08	2	IBS	EUR	1363	3	ETOH
115	HG01614	HG01614	2018-05-08	2	IBS	EUR	1364	3	GARD
115	HG01614	HG01614	2018-05-08	2	IBS	EUR	1365	3	IFNG
115	HG01614	HG01614	2018-05-08	2	IBS	EUR	1366	3	IGF1
115	HG01614	HG01614	2018-05-08	2	IBS	EUR	1367	3	TUNIC
115	HG01614	HG01614	2018-05-08	2	IBS	EUR	1368	3	H20
118	HG02666	HG02666	2018-05-08	1	GWD	AFR	1369	3	BAFF
118	HG02666	HG02666	2018-05-08	1	GWD	AFR	1370	3	DEX
118	HG02666	HG02666	2018-05-08	1	GWD	AFR	1371	3	GARD
118	HG02666	HG02666	2018-05-08	1	GWD	AFR	1372	3	TUNIC
118	HG02666	HG02666	2018-05-08	1	GWD	AFR	1373	3	H20
119	HG02817	HG02817	2018-05-08	2	GWD	AFR	1374	3	BAFF
119	HG02817	HG02817	2018-05-08	2	GWD	AFR	1375	3	DEX
119	HG02817	HG02817	2018-05-08	2	GWD	AFR	1376	3	ETOH
119	HG02817	HG02817	2018-05-08	2	GWD	AFR	1377	3	GARD
119	HG02817	HG02817	2018-05-08	2	GWD	AFR	1378	3	IFNG
119	HG02817	HG02817	2018-05-08	2	GWD	AFR	1379	3	IGF1
119	HG02817	HG02817	2018-05-08	2	GWD	AFR	1380	3	TUNIC
119	HG02817	HG02817	2018-05-08	2	GWD	AFR	1381	3	H20
11	HG01776	HG01776	2018-04-10	2	IBS	EUR	1382	3	BAFF
11	HG01776	HG01776	2018-04-10	2	IBS	EUR	1383	3	DEX
11	HG01776	HG01776	2018-04-10	2	IBS	EUR	1384	3	FSL1
11	HG01776	HG01776	2018-04-10	2	IBS	EUR	1385	3	GARD
11	HG01776	HG01776	2018-04-10	2	IBS	EUR	1386	3	IFNG
11	HG01776	HG01776	2018-04-10	2	IBS	EUR	1387	3	TUNIC
11	HG01776	HG01776	2018-04-10	2	IBS	EUR	1388	3	H20
120	HG02861	HG02861	2018-05-08	2	GWD	AFR	1389	3	BAFF
120	HG02861	HG02861	2018-05-08	2	GWD	AFR	1390	3	DEX
120	HG02861	HG02861	2018-05-08	2	GWD	AFR	1391	3	GARD
120	HG02861	HG02861	2018-05-08	2	GWD	AFR	1392	3	IFNG
120	HG02861	HG02861	2018-05-08	2	GWD	AFR	1393	3	IGF1
120	HG02861	HG02861	2018-05-08	2	GWD	AFR	1394	3	TUNIC
120	HG02861	HG02861	2018-05-08	2	GWD	AFR	1395	3	H20
123	HG03105	HG03105	2018-05-08	2	ESN	AFR	1396	3	BAFF
123	HG03105	HG03105	2018-05-08	2	ESN	AFR	1397	3	DEX
123	HG03105	HG03105	2018-05-08	2	ESN	AFR	1398	3	ETOH
123	HG03105	HG03105	2018-05-08	2	ESN	AFR	1399	3	IFNG
123	HG03105	HG03105	2018-05-08	2	ESN	AFR	1400	3	IGF1
123	HG03105	HG03105	2018-05-08	2	ESN	AFR	1401	3	TUNIC
123	HG03105	HG03105	2018-05-08	2	ESN	AFR	1402	3	H20
128	GM18879	NA18879	2018-05-09	1	YRI	AFR	1403	3	DEX
128	GM18879	NA18879	2018-05-09	1	YRI	AFR	1404	3	ETOH
128	GM18879	NA18879	2018-05-09	1	YRI	AFR	1405	3	GARD
128	GM18879	NA18879	2018-05-09	1	YRI	AFR	1406	3	IFNG
128	GM18879	NA18879	2018-05-09	1	YRI	AFR	1407	3	IGF1
128	GM18879	NA18879	2018-05-09	1	YRI	AFR	1408	3	TUNIC
128	GM18879	NA18879	2018-05-09	1	YRI	AFR	1409	3	H20
131	GM19385	NA19385	2018-05-09	1	LWK	AFR	1410	3	DEX
131	GM19385	NA19385	2018-05-09	1	LWK	AFR	1411	3	ETOH
131	GM19385	NA19385	2018-05-09	1	LWK	AFR	1412	3	GARD
131	GM19385	NA19385	2018-05-09	1	LWK	AFR	1413	3	IFNG
131	GM19385	NA19385	2018-05-09	1	LWK	AFR	1414	3	IGF1
131	GM19385	NA19385	2018-05-09	1	LWK	AFR	1415	3	TUNIC
131	GM19385	NA19385	2018-05-09	1	LWK	AFR	1416	3	H20
132	GM19391	NA19391	2018-05-09	2	LWK	AFR	1417	3	BAFF
132	GM19391	NA19391	2018-05-09	2	LWK	AFR	1418	3	DEX
132	GM19391	NA19391	2018-05-09	2	LWK	AFR	1419	3	ETOH
132	GM19391	NA19391	2018-05-09	2	LWK	AFR	1420	3	GARD
132	GM19391	NA19391	2018-05-09	2	LWK	AFR	1421	3	IFNG
132	GM19391	NA19391	2018-05-09	2	LWK	AFR	1422	3	IGF1
132	GM19391	NA19391	2018-05-09	2	LWK	AFR	1423	3	TUNIC
132	GM19391	NA19391	2018-05-09	2	LWK	AFR	1424	3	H20
138	GM20813	NA20813	2018-05-09	2	TSI	EUR	1425	3	BAFF
138	GM20813	NA20813	2018-05-09	2	TSI	EUR	1426	3	ETOH
138	GM20813	NA20813	2018-05-09	2	TSI	EUR	1427	3	TUNIC
138	GM20813	NA20813	2018-05-09	2	TSI	EUR	1428	3	H20
139	HG00256	HG00256	2018-05-09	1	GBR	EUR	1429	3	DEX
139	HG00256	HG00256	2018-05-09	1	GBR	EUR	1430	3	ETOH
139	HG00256	HG00256	2018-05-09	1	GBR	EUR	1431	3	GARD
139	HG00256	HG00256	2018-05-09	1	GBR	EUR	1432	3	IFNG
139	HG00256	HG00256	2018-05-09	1	GBR	EUR	1433	3	IGF1
139	HG00256	HG00256	2018-05-09	1	GBR	EUR	1434	3	TUNIC
139	HG00256	HG00256	2018-05-09	1	GBR	EUR	1435	3	H20
13	HG02625	HG02625	2018-04-10	1	GWD	AFR	1436	3	BAFF
13	HG02625	HG02625	2018-04-10	1	GWD	AFR	1437	3	FSL1
13	HG02625	HG02625	2018-04-10	1	GWD	AFR	1438	3	IFNG
140	HG03082	HG03082	2018-05-09	2	MSL	AFR	1439	3	DEX
140	HG03082	HG03082	2018-05-09	2	MSL	AFR	1440	3	GARD
140	HG03082	HG03082	2018-05-09	2	MSL	AFR	1441	3	IFNG
140	HG03082	HG03082	2018-05-09	2	MSL	AFR	1442	3	IGF1
140	HG03082	HG03082	2018-05-09	2	MSL	AFR	1443	3	TUNIC
140	HG03082	HG03082	2018-05-09	2	MSL	AFR	1444	3	H20
141	HG03117	HG03117	2018-05-09	2	ESN	AFR	1445	3	BAFF
141	HG03117	HG03117	2018-05-09	2	ESN	AFR	1446	3	DEX
141	HG03117	HG03117	2018-05-09	2	ESN	AFR	1447	3	ETOH
141	HG03117	HG03117	2018-05-09	2	ESN	AFR	1448	3	IFNG
141	HG03117	HG03117	2018-05-09	2	ESN	AFR	1449	3	IGF1
141	HG03117	HG03117	2018-05-09	2	ESN	AFR	1450	3	H20
145	HG03361	HG03361	2018-05-09	1	ESN	AFR	1451	3	BAFF
145	HG03361	HG03361	2018-05-09	1	ESN	AFR	1452	3	DEX
145	HG03361	HG03361	2018-05-09	1	ESN	AFR	1453	3	ETOH
145	HG03361	HG03361	2018-05-09	1	ESN	AFR	1454	3	TUNIC
145	HG03361	HG03361	2018-05-09	1	ESN	AFR	1455	3	H20
146	HG03433	HG03433	2018-05-09	1	MSL	AFR	1456	3	DEX
146	HG03433	HG03433	2018-05-09	1	MSL	AFR	1457	3	ETOH
146	HG03433	HG03433	2018-05-09	1	MSL	AFR	1458	3	IFNG
146	HG03433	HG03433	2018-05-09	1	MSL	AFR	1459	3	TUNIC
157	HG00306	HG00306	2018-05-22	2	FIN	EUR	1460	3	BAFF
157	HG00306	HG00306	2018-05-22	2	FIN	EUR	1461	3	DEX
157	HG00306	HG00306	2018-05-22	2	FIN	EUR	1462	3	ETOH
157	HG00306	HG00306	2018-05-22	2	FIN	EUR	1463	3	GARD
157	HG00306	HG00306	2018-05-22	2	FIN	EUR	1464	3	IFNG
157	HG00306	HG00306	2018-05-22	2	FIN	EUR	1465	3	IGF1
158	HG00323	HG00323	2018-05-22	2	FIN	EUR	1466	3	DEX
158	HG00323	HG00323	2018-05-22	2	FIN	EUR	1467	3	ETOH
158	HG00323	HG00323	2018-05-22	2	FIN	EUR	1468	3	GARD
158	HG00323	HG00323	2018-05-22	2	FIN	EUR	1469	3	IFNG
158	HG00323	HG00323	2018-05-22	2	FIN	EUR	1470	3	IGF1
158	HG00323	HG00323	2018-05-22	2	FIN	EUR	1471	3	TUNIC
158	HG00323	HG00323	2018-05-22	2	FIN	EUR	1472	3	H20
159	HG00343	HG00343	2018-05-22	2	FIN	EUR	1473	3	GARD
159	HG00343	HG00343	2018-05-22	2	FIN	EUR	1474	3	IGF1
159	HG00343	HG00343	2018-05-22	2	FIN	EUR	1475	3	H20
160	HG00344	HG00344	2018-05-22	2	FIN	EUR	1476	3	DEX
160	HG00344	HG00344	2018-05-22	2	FIN	EUR	1477	3	ETOH
160	HG00344	HG00344	2018-05-22	2	FIN	EUR	1478	3	IFNG
160	HG00344	HG00344	2018-05-22	2	FIN	EUR	1479	3	IGF1
160	HG00344	HG00344	2018-05-22	2	FIN	EUR	1480	3	H20
161	HG00368	HG00368	2018-05-22	2	FIN	EUR	1481	3	DEX
161	HG00368	HG00368	2018-05-22	2	FIN	EUR	1482	3	ETOH
161	HG00368	HG00368	2018-05-22	2	FIN	EUR	1483	3	GARD
161	HG00368	HG00368	2018-05-22	2	FIN	EUR	1484	3	IGF1
162	HG00376	HG00376	2018-05-22	2	FIN	EUR	1485	3	IFNG
162	HG00376	HG00376	2018-05-22	2	FIN	EUR	1486	3	IGF1
165	HG01625	HG01625	2018-05-22	1	IBS	EUR	1487	3	DEX
165	HG01625	HG01625	2018-05-22	1	IBS	EUR	1488	3	GARD
165	HG01625	HG01625	2018-05-22	1	IBS	EUR	1489	3	IFNG
165	HG01625	HG01625	2018-05-22	1	IBS	EUR	1490	3	IGF1
165	HG01625	HG01625	2018-05-22	1	IBS	EUR	1491	3	H20
170	HG02704	HG02704	2018-05-22	2	GWD	AFR	1492	3	H20
172	HG03069	HG03069	2018-05-22	1	MSL	AFR	1493	3	H20
178	GM18869	NA18869	2018-05-23	1	YRI	AFR	1494	3	BAFF
178	GM18869	NA18869	2018-05-23	1	YRI	AFR	1495	3	DEX
178	GM18869	NA18869	2018-05-23	1	YRI	AFR	1496	3	ETOH
178	GM18869	NA18869	2018-05-23	1	YRI	AFR	1497	3	TUNIC
182	GM19132	NA19132	2018-05-23	2	YRI	AFR	1498	3	BAFF
182	GM19132	NA19132	2018-05-23	2	YRI	AFR	1499	3	ETOH
182	GM19132	NA19132	2018-05-23	2	YRI	AFR	1500	3	GARD
182	GM19132	NA19132	2018-05-23	2	YRI	AFR	1501	3	IFNG
182	GM19132	NA19132	2018-05-23	2	YRI	AFR	1502	3	IGF1
182	GM19132	NA19132	2018-05-23	2	YRI	AFR	1503	3	TUNIC
182	GM19132	NA19132	2018-05-23	2	YRI	AFR	1504	3	H20
187	GM19474	NA19474	2018-05-23	2	LWK	AFR	1505	3	BAFF
187	GM19474	NA19474	2018-05-23	2	LWK	AFR	1506	3	DEX
187	GM19474	NA19474	2018-05-23	2	LWK	AFR	1507	3	ETOH
187	GM19474	NA19474	2018-05-23	2	LWK	AFR	1508	3	GARD
187	GM19474	NA19474	2018-05-23	2	LWK	AFR	1509	3	IFNG
187	GM19474	NA19474	2018-05-23	2	LWK	AFR	1510	3	TUNIC
187	GM19474	NA19474	2018-05-23	2	LWK	AFR	1511	3	H20
188	GM20536	NA20536	2018-05-23	1	TSI	EUR	1512	3	BAFF
188	GM20536	NA20536	2018-05-23	1	TSI	EUR	1513	3	DEX
188	GM20536	NA20536	2018-05-23	1	TSI	EUR	1514	3	ETOH
188	GM20536	NA20536	2018-05-23	1	TSI	EUR	1515	3	GARD
188	GM20536	NA20536	2018-05-23	1	TSI	EUR	1516	3	IFNG
188	GM20536	NA20536	2018-05-23	1	TSI	EUR	1517	3	IGF1
188	GM20536	NA20536	2018-05-23	1	TSI	EUR	1518	3	TUNIC
188	GM20536	NA20536	2018-05-23	1	TSI	EUR	1519	3	H20
189	GM20771	NA20771	2018-05-23	2	TSI	EUR	1520	3	TUNIC
18	HG03050	HG03050	2018-04-10	1	GWD	AFR	1521	3	BAFF
18	HG03050	HG03050	2018-04-10	1	GWD	AFR	1522	3	ETOH
18	HG03050	HG03050	2018-04-10	1	GWD	AFR	1523	3	FSL1
18	HG03050	HG03050	2018-04-10	1	GWD	AFR	1524	3	GARD
18	HG03050	HG03050	2018-04-10	1	GWD	AFR	1525	3	IFNG
18	HG03050	HG03050	2018-04-10	1	GWD	AFR	1526	3	H20
194	HG03095	HG03095	2018-05-23	2	MSL	AFR	1527	3	BAFF
194	HG03095	HG03095	2018-05-23	2	MSL	AFR	1528	3	ETOH
194	HG03095	HG03095	2018-05-23	2	MSL	AFR	1529	3	IGF1
194	HG03095	HG03095	2018-05-23	2	MSL	AFR	1530	3	TUNIC
194	HG03095	HG03095	2018-05-23	2	MSL	AFR	1531	3	H20
196	HG03294	HG03294	2018-05-23	2	ESN	AFR	1532	3	BAFF
196	HG03294	HG03294	2018-05-23	2	ESN	AFR	1533	3	ETOH
197	HG03363	HG03363	2018-05-23	2	ESN	AFR	1534	3	BAFF
197	HG03363	HG03363	2018-05-23	2	ESN	AFR	1535	3	DEX
197	HG03363	HG03363	2018-05-23	2	ESN	AFR	1536	3	ETOH
197	HG03363	HG03363	2018-05-23	2	ESN	AFR	1537	3	IFNG
197	HG03363	HG03363	2018-05-23	2	ESN	AFR	1538	3	TUNIC
197	HG03363	HG03363	2018-05-23	2	ESN	AFR	1539	3	H20
198	HG03381	HG03381	2018-05-23	2	MSL	AFR	1540	3	BAFF
198	HG03381	HG03381	2018-05-23	2	MSL	AFR	1541	3	DEX
198	HG03381	HG03381	2018-05-23	2	MSL	AFR	1542	3	ETOH
198	HG03381	HG03381	2018-05-23	2	MSL	AFR	1543	3	GARD
198	HG03381	HG03381	2018-05-23	2	MSL	AFR	1544	3	IFNG
198	HG03381	HG03381	2018-05-23	2	MSL	AFR	1545	3	IGF1
198	HG03381	HG03381	2018-05-23	2	MSL	AFR	1546	3	TUNIC
198	HG03381	HG03381	2018-05-23	2	MSL	AFR	1547	3	H20
19	HG03078	HG03078	2018-04-10	1	MSL	AFR	1548	3	DEX
19	HG03078	HG03078	2018-04-10	1	MSL	AFR	1549	3	ETOH
19	HG03078	HG03078	2018-04-10	1	MSL	AFR	1550	3	IFNG
19	HG03078	HG03078	2018-04-10	1	MSL	AFR	1551	3	TUNIC
19	HG03078	HG03078	2018-04-10	1	MSL	AFR	1552	3	H20
21	HG03111	HG03111	2018-04-10	2	ESN	AFR	1553	3	ETOH
21	HG03111	HG03111	2018-04-10	2	ESN	AFR	1554	3	FSL1
21	HG03111	HG03111	2018-04-10	2	ESN	AFR	1555	3	GARD
21	HG03111	HG03111	2018-04-10	2	ESN	AFR	1556	3	H20
251	GM10837	GM10837	2018-06-19	1	CEU	EUR	1557	3	BAFF
251	GM10837	GM10837	2018-06-19	1	CEU	EUR	1558	3	DEX
251	GM10837	GM10837	2018-06-19	1	CEU	EUR	1559	3	ETOH
251	GM10837	GM10837	2018-06-19	1	CEU	EUR	1560	3	IFNG
251	GM10837	GM10837	2018-06-19	1	CEU	EUR	1561	3	IGF1
251	GM10837	GM10837	2018-06-19	1	CEU	EUR	1562	3	TUNIC
251	GM10837	GM10837	2018-06-19	1	CEU	EUR	1563	3	H20
252	GM11933	GM11933	2018-06-19	2	CEU	EUR	1564	3	ETOH
252	GM11933	GM11933	2018-06-19	2	CEU	EUR	1565	3	GARD
252	GM11933	GM11933	2018-06-19	2	CEU	EUR	1566	3	TUNIC
252	GM11933	GM11933	2018-06-19	2	CEU	EUR	1567	3	H20
253	HG00104	HG00104	2018-06-19	2	GBR	EUR	1568	3	BAFF
253	HG00104	HG00104	2018-06-19	2	GBR	EUR	1569	3	ETOH
253	HG00104	HG00104	2018-06-19	2	GBR	EUR	1570	3	IFNG
254	HG00121	HG00121	2018-06-19	2	GBR	EUR	1571	3	DEX
254	HG00121	HG00121	2018-06-19	2	GBR	EUR	1572	3	ETOH
254	HG00121	HG00121	2018-06-19	2	GBR	EUR	1573	3	IFNG
254	HG00121	HG00121	2018-06-19	2	GBR	EUR	1574	3	TUNIC
255	HG00152	HG00152	2018-06-19	1	GBR	EUR	1575	3	BAFF
255	HG00152	HG00152	2018-06-19	1	GBR	EUR	1576	3	DEX
255	HG00152	HG00152	2018-06-19	1	GBR	EUR	1577	3	ETOH
255	HG00152	HG00152	2018-06-19	1	GBR	EUR	1578	3	GARD
255	HG00152	HG00152	2018-06-19	1	GBR	EUR	1579	3	IFNG
255	HG00152	HG00152	2018-06-19	1	GBR	EUR	1580	3	IGF1
255	HG00152	HG00152	2018-06-19	1	GBR	EUR	1581	3	TUNIC
255	HG00152	HG00152	2018-06-19	1	GBR	EUR	1582	3	H20
256	HG00234	HG00234	2018-06-19	1	GBR	EUR	1583	3	BAFF
256	HG00234	HG00234	2018-06-19	1	GBR	EUR	1584	3	DEX
256	HG00234	HG00234	2018-06-19	1	GBR	EUR	1585	3	ETOH
256	HG00234	HG00234	2018-06-19	1	GBR	EUR	1586	3	GARD
256	HG00234	HG00234	2018-06-19	1	GBR	EUR	1587	3	IFNG
256	HG00234	HG00234	2018-06-19	1	GBR	EUR	1588	3	IGF1
256	HG00234	HG00234	2018-06-19	1	GBR	EUR	1589	3	TUNIC
256	HG00234	HG00234	2018-06-19	1	GBR	EUR	1590	3	H20
257	HG00251	HG00251	2018-06-19	1	GBR	EUR	1591	3	BAFF
257	HG00251	HG00251	2018-06-19	1	GBR	EUR	1592	3	ETOH
257	HG00251	HG00251	2018-06-19	1	GBR	EUR	1593	3	GARD
257	HG00251	HG00251	2018-06-19	1	GBR	EUR	1594	3	IFNG
257	HG00251	HG00251	2018-06-19	1	GBR	EUR	1595	3	IGF1
257	HG00251	HG00251	2018-06-19	1	GBR	EUR	1596	3	TUNIC
257	HG00251	HG00251	2018-06-19	1	GBR	EUR	1597	3	H20
258	HG00360	HG00360	2018-06-19	1	FIN	EUR	1598	3	H20
259	HG00366	HG00366	2018-06-19	1	FIN	EUR	1599	3	BAFF
259	HG00366	HG00366	2018-06-19	1	FIN	EUR	1600	3	DEX
259	HG00366	HG00366	2018-06-19	1	FIN	EUR	1601	3	ETOH
259	HG00366	HG00366	2018-06-19	1	FIN	EUR	1602	3	GARD
259	HG00366	HG00366	2018-06-19	1	FIN	EUR	1603	3	IFNG
259	HG00366	HG00366	2018-06-19	1	FIN	EUR	1604	3	IGF1
259	HG00366	HG00366	2018-06-19	1	FIN	EUR	1605	3	TUNIC
259	HG00366	HG00366	2018-06-19	1	FIN	EUR	1606	3	H20
260	HG00373	HG00373	2018-06-19	2	FIN	EUR	1607	3	DEX
262	HG01674	HG01674	2018-06-19	1	IBS	EUR	1608	3	BAFF
262	HG01674	HG01674	2018-06-19	1	IBS	EUR	1609	3	DEX
262	HG01674	HG01674	2018-06-19	1	IBS	EUR	1610	3	ETOH
262	HG01674	HG01674	2018-06-19	1	IBS	EUR	1611	3	GARD
262	HG01674	HG01674	2018-06-19	1	IBS	EUR	1612	3	IFNG
262	HG01674	HG01674	2018-06-19	1	IBS	EUR	1613	3	IGF1
262	HG01674	HG01674	2018-06-19	1	IBS	EUR	1614	3	TUNIC
262	HG01674	HG01674	2018-06-19	1	IBS	EUR	1615	3	H20
264	HG01700	HG01700	2018-06-19	1	IBS	EUR	1616	3	BAFF
264	HG01700	HG01700	2018-06-19	1	IBS	EUR	1617	3	DEX
264	HG01700	HG01700	2018-06-19	1	IBS	EUR	1618	3	ETOH
264	HG01700	HG01700	2018-06-19	1	IBS	EUR	1619	3	GARD
264	HG01700	HG01700	2018-06-19	1	IBS	EUR	1620	3	IFNG
264	HG01700	HG01700	2018-06-19	1	IBS	EUR	1621	3	IGF1
264	HG01700	HG01700	2018-06-19	1	IBS	EUR	1622	3	H20
265	HG01761	HG01761	2018-06-19	1	IBS	EUR	1623	3	IGF1
266	HG02240	HG02240	2018-06-19	2	IBS	EUR	1624	3	BAFF
266	HG02240	HG02240	2018-06-19	2	IBS	EUR	1625	3	DEX
266	HG02240	HG02240	2018-06-19	2	IBS	EUR	1626	3	ETOH
266	HG02240	HG02240	2018-06-19	2	IBS	EUR	1627	3	TUNIC
268	HG02680	HG02680	2018-06-19	2	GWD	AFR	1628	3	DEX
26	GM12400	GM12400	2018-04-11	2	CEU	EUR	1629	3	BAFF
26	GM12400	GM12400	2018-04-11	2	CEU	EUR	1630	3	ETOH
26	GM12400	GM12400	2018-04-11	2	CEU	EUR	1631	3	FSL1
26	GM12400	GM12400	2018-04-11	2	CEU	EUR	1632	3	GARD
26	GM12400	GM12400	2018-04-11	2	CEU	EUR	1633	3	IFNG
26	GM12400	GM12400	2018-04-11	2	CEU	EUR	1634	3	TUNIC
26	GM12400	GM12400	2018-04-11	2	CEU	EUR	1635	3	H20
272	HG02952	HG02952	2018-06-19	2	ESN	AFR	1636	3	DEX
272	HG02952	HG02952	2018-06-19	2	ESN	AFR	1637	3	GARD
272	HG02952	HG02952	2018-06-19	2	ESN	AFR	1638	3	IFNG
273	HG02971	HG02971	2018-06-19	1	ESN	AFR	1639	3	DEX
274	HG03066	HG03066	2018-06-19	1	MSL	AFR	1640	3	GARD
274	HG03066	HG03066	2018-06-19	1	MSL	AFR	1641	3	H20
276	GM10856	GM10856	2018-06-20	1	CEU	EUR	1642	3	BAFF
276	GM10856	GM10856	2018-06-20	1	CEU	EUR	1643	3	DEX
276	GM10856	GM10856	2018-06-20	1	CEU	EUR	1644	3	ETOH
276	GM10856	GM10856	2018-06-20	1	CEU	EUR	1645	3	GARD
276	GM10856	GM10856	2018-06-20	1	CEU	EUR	1646	3	IGF1
276	GM10856	GM10856	2018-06-20	1	CEU	EUR	1647	3	TUNIC
276	GM10856	GM10856	2018-06-20	1	CEU	EUR	1648	3	H20
27	GM18881	NA18881	2018-04-11	2	YRI	AFR	1649	3	BAFF
27	GM18881	NA18881	2018-04-11	2	YRI	AFR	1650	3	DEX
27	GM18881	NA18881	2018-04-11	2	YRI	AFR	1651	3	TUNIC
285	GM20522	NA20522	2018-06-20	2	TSI	EUR	1652	3	BAFF
285	GM20522	NA20522	2018-06-20	2	TSI	EUR	1653	3	DEX
285	GM20522	NA20522	2018-06-20	2	TSI	EUR	1654	3	ETOH
285	GM20522	NA20522	2018-06-20	2	TSI	EUR	1655	3	GARD
285	GM20522	NA20522	2018-06-20	2	TSI	EUR	1656	3	IFNG
285	GM20522	NA20522	2018-06-20	2	TSI	EUR	1657	3	IGF1
285	GM20522	NA20522	2018-06-20	2	TSI	EUR	1658	3	TUNIC
285	GM20522	NA20522	2018-06-20	2	TSI	EUR	1659	3	H20
287	GM20758	NA20758	2018-06-20	1	TSI	EUR	1660	3	BAFF
287	GM20758	NA20758	2018-06-20	1	TSI	EUR	1661	3	DEX
287	GM20758	NA20758	2018-06-20	1	TSI	EUR	1662	3	ETOH
287	GM20758	NA20758	2018-06-20	1	TSI	EUR	1663	3	GARD
287	GM20758	NA20758	2018-06-20	1	TSI	EUR	1664	3	IFNG
287	GM20758	NA20758	2018-06-20	1	TSI	EUR	1665	3	IGF1
287	GM20758	NA20758	2018-06-20	1	TSI	EUR	1666	3	TUNIC
287	GM20758	NA20758	2018-06-20	1	TSI	EUR	1667	3	H20
288	GM20800	NA20800	2018-06-20	2	TSI	EUR	1668	3	BAFF
288	GM20800	NA20800	2018-06-20	2	TSI	EUR	1669	3	ETOH
288	GM20800	NA20800	2018-06-20	2	TSI	EUR	1670	3	GARD
288	GM20800	NA20800	2018-06-20	2	TSI	EUR	1671	3	IGF1
288	GM20800	NA20800	2018-06-20	2	TSI	EUR	1672	3	TUNIC
288	GM20800	NA20800	2018-06-20	2	TSI	EUR	1673	3	H20
292	HG00263	HG00263	2018-06-20	2	GBR	EUR	1674	3	BAFF
292	HG00263	HG00263	2018-06-20	2	GBR	EUR	1675	3	DEX
292	HG00263	HG00263	2018-06-20	2	GBR	EUR	1676	3	ETOH
292	HG00263	HG00263	2018-06-20	2	GBR	EUR	1677	3	GARD
292	HG00263	HG00263	2018-06-20	2	GBR	EUR	1678	3	IFNG
292	HG00263	HG00263	2018-06-20	2	GBR	EUR	1679	3	IGF1
292	HG00263	HG00263	2018-06-20	2	GBR	EUR	1680	3	TUNIC
29	GM19097	NA19097	2018-04-11	2	YRI	AFR	1681	3	DEX
29	GM19097	NA19097	2018-04-11	2	YRI	AFR	1682	3	FSL1
29	GM19097	NA19097	2018-04-11	2	YRI	AFR	1683	3	H20
303	HG00143	HG00143	2018-07-17	1	GBR	EUR	1684	3	BAFF
303	HG00143	HG00143	2018-07-17	1	GBR	EUR	1685	3	ETOH
303	HG00143	HG00143	2018-07-17	1	GBR	EUR	1686	3	GARD
303	HG00143	HG00143	2018-07-17	1	GBR	EUR	1687	3	IFNG
303	HG00143	HG00143	2018-07-17	1	GBR	EUR	1688	3	IGF1
303	HG00143	HG00143	2018-07-17	1	GBR	EUR	1689	3	TUNIC
303	HG00143	HG00143	2018-07-17	1	GBR	EUR	1690	3	H20
304	HG00150	HG00150	2018-07-17	2	GBR	EUR	1691	3	BAFF
304	HG00150	HG00150	2018-07-17	2	GBR	EUR	1692	3	DEX
304	HG00150	HG00150	2018-07-17	2	GBR	EUR	1693	3	IFNG
304	HG00150	HG00150	2018-07-17	2	GBR	EUR	1694	3	IGF1
304	HG00150	HG00150	2018-07-17	2	GBR	EUR	1695	3	TUNIC
304	HG00150	HG00150	2018-07-17	2	GBR	EUR	1696	3	H20
307	HG00327	HG00327	2018-07-17	2	FIN	EUR	1697	3	BAFF
307	HG00327	HG00327	2018-07-17	2	FIN	EUR	1698	3	DEX
307	HG00327	HG00327	2018-07-17	2	FIN	EUR	1699	3	ETOH
307	HG00327	HG00327	2018-07-17	2	FIN	EUR	1700	3	GARD
307	HG00327	HG00327	2018-07-17	2	FIN	EUR	1701	3	IFNG
307	HG00327	HG00327	2018-07-17	2	FIN	EUR	1702	3	H20
308	HG00329	HG00329	2018-07-17	1	FIN	EUR	1703	3	BAFF
308	HG00329	HG00329	2018-07-17	1	FIN	EUR	1704	3	DEX
308	HG00329	HG00329	2018-07-17	1	FIN	EUR	1705	3	ETOH
308	HG00329	HG00329	2018-07-17	1	FIN	EUR	1706	3	GARD
308	HG00329	HG00329	2018-07-17	1	FIN	EUR	1707	3	IFNG
308	HG00329	HG00329	2018-07-17	1	FIN	EUR	1708	3	IGF1
308	HG00329	HG00329	2018-07-17	1	FIN	EUR	1709	3	TUNIC
308	HG00329	HG00329	2018-07-17	1	FIN	EUR	1710	3	H20
309	HG00336	HG00336	2018-07-17	1	FIN	EUR	1711	3	BAFF
309	HG00336	HG00336	2018-07-17	1	FIN	EUR	1712	3	DEX
309	HG00336	HG00336	2018-07-17	1	FIN	EUR	1713	3	ETOH
309	HG00336	HG00336	2018-07-17	1	FIN	EUR	1714	3	GARD
309	HG00336	HG00336	2018-07-17	1	FIN	EUR	1715	3	IGF1
309	HG00336	HG00336	2018-07-17	1	FIN	EUR	1716	3	TUNIC
309	HG00336	HG00336	2018-07-17	1	FIN	EUR	1717	3	H20
30	GM19118	NA19118	2018-04-11	2	YRI	AFR	1718	3	BAFF
30	GM19118	NA19118	2018-04-11	2	YRI	AFR	1719	3	ETOH
30	GM19118	NA19118	2018-04-11	2	YRI	AFR	1720	3	GARD
30	GM19118	NA19118	2018-04-11	2	YRI	AFR	1721	3	TUNIC
30	GM19118	NA19118	2018-04-11	2	YRI	AFR	1722	3	H20
312	HG01611	HG01611	2018-07-17	1	IBS	EUR	1723	3	BAFF
312	HG01611	HG01611	2018-07-17	1	IBS	EUR	1724	3	DEX
312	HG01611	HG01611	2018-07-17	1	IBS	EUR	1725	3	ETOH
312	HG01611	HG01611	2018-07-17	1	IBS	EUR	1726	3	GARD
312	HG01611	HG01611	2018-07-17	1	IBS	EUR	1727	3	IFNG
312	HG01611	HG01611	2018-07-17	1	IBS	EUR	1728	3	IGF1
312	HG01611	HG01611	2018-07-17	1	IBS	EUR	1729	3	TUNIC
312	HG01611	HG01611	2018-07-17	1	IBS	EUR	1730	3	H20
314	HG02221	HG02221	2018-07-17	1	IBS	EUR	1731	3	BAFF
314	HG02221	HG02221	2018-07-17	1	IBS	EUR	1732	3	DEX
314	HG02221	HG02221	2018-07-17	1	IBS	EUR	1733	3	ETOH
314	HG02221	HG02221	2018-07-17	1	IBS	EUR	1734	3	GARD
314	HG02221	HG02221	2018-07-17	1	IBS	EUR	1735	3	IFNG
314	HG02221	HG02221	2018-07-17	1	IBS	EUR	1736	3	IGF1
314	HG02221	HG02221	2018-07-17	1	IBS	EUR	1737	3	TUNIC
314	HG02221	HG02221	2018-07-17	1	IBS	EUR	1738	3	H20
315	HG02587	HG02587	2018-07-17	2	GWD	AFR	1739	3	BAFF
315	HG02587	HG02587	2018-07-17	2	GWD	AFR	1740	3	DEX
315	HG02587	HG02587	2018-07-17	2	GWD	AFR	1741	3	ETOH
315	HG02587	HG02587	2018-07-17	2	GWD	AFR	1742	3	GARD
315	HG02587	HG02587	2018-07-17	2	GWD	AFR	1743	3	IFNG
315	HG02587	HG02587	2018-07-17	2	GWD	AFR	1744	3	IGF1
315	HG02587	HG02587	2018-07-17	2	GWD	AFR	1745	3	TUNIC
315	HG02587	HG02587	2018-07-17	2	GWD	AFR	1746	3	H20
318	HG02813	HG02813	2018-07-17	1	GWD	AFR	1747	3	DEX
318	HG02813	HG02813	2018-07-17	1	GWD	AFR	1748	3	ETOH
318	HG02813	HG02813	2018-07-17	1	GWD	AFR	1749	3	IFNG
318	HG02813	HG02813	2018-07-17	1	GWD	AFR	1750	3	IGF1
318	HG02813	HG02813	2018-07-17	1	GWD	AFR	1751	3	TUNIC
318	HG02813	HG02813	2018-07-17	1	GWD	AFR	1752	3	H20
320	HG03026	HG03026	2018-07-17	2	GWD	AFR	1753	3	BAFF
320	HG03026	HG03026	2018-07-17	2	GWD	AFR	1754	3	DEX
320	HG03026	HG03026	2018-07-17	2	GWD	AFR	1755	3	ETOH
320	HG03026	HG03026	2018-07-17	2	GWD	AFR	1756	3	IGF1
320	HG03026	HG03026	2018-07-17	2	GWD	AFR	1757	3	TUNIC
320	HG03026	HG03026	2018-07-17	2	GWD	AFR	1758	3	H20
321	HG03053	HG03053	2018-07-17	2	MSL	AFR	1759	3	BAFF
321	HG03053	HG03053	2018-07-17	2	MSL	AFR	1760	3	DEX
321	HG03053	HG03053	2018-07-17	2	MSL	AFR	1761	3	ETOH
321	HG03053	HG03053	2018-07-17	2	MSL	AFR	1762	3	GARD
321	HG03053	HG03053	2018-07-17	2	MSL	AFR	1763	3	IGF1
321	HG03053	HG03053	2018-07-17	2	MSL	AFR	1764	3	TUNIC
321	HG03053	HG03053	2018-07-17	2	MSL	AFR	1765	3	H20
323	HG03199	HG03199	2018-07-17	1	ESN	AFR	1766	3	BAFF
323	HG03199	HG03199	2018-07-17	1	ESN	AFR	1767	3	DEX
323	HG03199	HG03199	2018-07-17	1	ESN	AFR	1768	3	GARD
323	HG03199	HG03199	2018-07-17	1	ESN	AFR	1769	3	IFNG
323	HG03199	HG03199	2018-07-17	1	ESN	AFR	1770	3	IGF1
323	HG03199	HG03199	2018-07-17	1	ESN	AFR	1771	3	TUNIC
323	HG03199	HG03199	2018-07-17	1	ESN	AFR	1772	3	H20
328	GM19146	NA19146	2018-07-18	1	YRI	AFR	1773	3	BAFF
328	GM19146	NA19146	2018-07-18	1	YRI	AFR	1774	3	DEX
328	GM19146	NA19146	2018-07-18	1	YRI	AFR	1775	3	GARD
328	GM19146	NA19146	2018-07-18	1	YRI	AFR	1776	3	IFNG
328	GM19146	NA19146	2018-07-18	1	YRI	AFR	1777	3	IGF1
331	GM19360	NA19360	2018-07-18	1	LWK	AFR	1778	3	BAFF
331	GM19360	NA19360	2018-07-18	1	LWK	AFR	1779	3	DEX
331	GM19360	NA19360	2018-07-18	1	LWK	AFR	1780	3	ETOH
331	GM19360	NA19360	2018-07-18	1	LWK	AFR	1781	3	GARD
331	GM19360	NA19360	2018-07-18	1	LWK	AFR	1782	3	IFNG
331	GM19360	NA19360	2018-07-18	1	LWK	AFR	1783	3	IGF1
331	GM19360	NA19360	2018-07-18	1	LWK	AFR	1784	3	TUNIC
333	GM20510	NA20510	2018-07-18	1	TSI	EUR	1785	3	BAFF
333	GM20510	NA20510	2018-07-18	1	TSI	EUR	1786	3	DEX
333	GM20510	NA20510	2018-07-18	1	TSI	EUR	1787	3	ETOH
333	GM20510	NA20510	2018-07-18	1	TSI	EUR	1788	3	GARD
333	GM20510	NA20510	2018-07-18	1	TSI	EUR	1789	3	IFNG
333	GM20510	NA20510	2018-07-18	1	TSI	EUR	1790	3	IGF1
333	GM20510	NA20510	2018-07-18	1	TSI	EUR	1791	3	TUNIC
333	GM20510	NA20510	2018-07-18	1	TSI	EUR	1792	3	H20
334	GM20517	NA20517	2018-07-18	2	TSI	EUR	1793	3	BAFF
334	GM20517	NA20517	2018-07-18	2	TSI	EUR	1794	3	DEX
334	GM20517	NA20517	2018-07-18	2	TSI	EUR	1795	3	ETOH
334	GM20517	NA20517	2018-07-18	2	TSI	EUR	1796	3	GARD
334	GM20517	NA20517	2018-07-18	2	TSI	EUR	1797	3	IFNG
334	GM20517	NA20517	2018-07-18	2	TSI	EUR	1798	3	IGF1
334	GM20517	NA20517	2018-07-18	2	TSI	EUR	1799	3	TUNIC
334	GM20517	NA20517	2018-07-18	2	TSI	EUR	1800	3	H20
335	GM20542	NA20542	2018-07-18	2	TSI	EUR	1801	3	BAFF
335	GM20542	NA20542	2018-07-18	2	TSI	EUR	1802	3	DEX
335	GM20542	NA20542	2018-07-18	2	TSI	EUR	1803	3	ETOH
335	GM20542	NA20542	2018-07-18	2	TSI	EUR	1804	3	GARD
335	GM20542	NA20542	2018-07-18	2	TSI	EUR	1805	3	IFNG
335	GM20542	NA20542	2018-07-18	2	TSI	EUR	1806	3	IGF1
335	GM20542	NA20542	2018-07-18	2	TSI	EUR	1807	3	TUNIC
335	GM20542	NA20542	2018-07-18	2	TSI	EUR	1808	3	H20
336	GM20774	NA20774	2018-07-18	2	TSI	EUR	1809	3	BAFF
336	GM20774	NA20774	2018-07-18	2	TSI	EUR	1810	3	DEX
336	GM20774	NA20774	2018-07-18	2	TSI	EUR	1811	3	ETOH
336	GM20774	NA20774	2018-07-18	2	TSI	EUR	1812	3	GARD
336	GM20774	NA20774	2018-07-18	2	TSI	EUR	1813	3	IFNG
336	GM20774	NA20774	2018-07-18	2	TSI	EUR	1814	3	IGF1
336	GM20774	NA20774	2018-07-18	2	TSI	EUR	1815	3	TUNIC
336	GM20774	NA20774	2018-07-18	2	TSI	EUR	1816	3	H20
338	GM20804	NA20804	2018-07-18	2	TSI	EUR	1817	3	BAFF
338	GM20804	NA20804	2018-07-18	2	TSI	EUR	1818	3	DEX
338	GM20804	NA20804	2018-07-18	2	TSI	EUR	1819	3	ETOH
338	GM20804	NA20804	2018-07-18	2	TSI	EUR	1820	3	GARD
338	GM20804	NA20804	2018-07-18	2	TSI	EUR	1821	3	IFNG
338	GM20804	NA20804	2018-07-18	2	TSI	EUR	1822	3	IGF1
338	GM20804	NA20804	2018-07-18	2	TSI	EUR	1823	3	TUNIC
338	GM20804	NA20804	2018-07-18	2	TSI	EUR	1824	3	H20
341	HG03380	HG03380	2018-07-18	2	MSL	AFR	1825	3	BAFF
341	HG03380	HG03380	2018-07-18	2	MSL	AFR	1826	3	DEX
341	HG03380	HG03380	2018-07-18	2	MSL	AFR	1827	3	ETOH
341	HG03380	HG03380	2018-07-18	2	MSL	AFR	1828	3	GARD
341	HG03380	HG03380	2018-07-18	2	MSL	AFR	1829	3	IFNG
341	HG03380	HG03380	2018-07-18	2	MSL	AFR	1830	3	IGF1
341	HG03380	HG03380	2018-07-18	2	MSL	AFR	1831	3	TUNIC
341	HG03380	HG03380	2018-07-18	2	MSL	AFR	1832	3	H20
342	HG03428	HG03428	2018-07-18	2	MSL	AFR	1833	3	BAFF
342	HG03428	HG03428	2018-07-18	2	MSL	AFR	1834	3	ETOH
342	HG03428	HG03428	2018-07-18	2	MSL	AFR	1835	3	IFNG
342	HG03428	HG03428	2018-07-18	2	MSL	AFR	1836	3	IGF1
342	HG03428	HG03428	2018-07-18	2	MSL	AFR	1837	3	TUNIC
342	HG03428	HG03428	2018-07-18	2	MSL	AFR	1838	3	H20
343	HG03432	HG03432	2018-07-18	1	MSL	AFR	1839	3	BAFF
343	HG03432	HG03432	2018-07-18	1	MSL	AFR	1840	3	DEX
343	HG03432	HG03432	2018-07-18	1	MSL	AFR	1841	3	ETOH
343	HG03432	HG03432	2018-07-18	1	MSL	AFR	1842	3	GARD
343	HG03432	HG03432	2018-07-18	1	MSL	AFR	1843	3	IFNG
343	HG03432	HG03432	2018-07-18	1	MSL	AFR	1844	3	IGF1
343	HG03432	HG03432	2018-07-18	1	MSL	AFR	1845	3	TUNIC
343	HG03432	HG03432	2018-07-18	1	MSL	AFR	1846	3	H20
344	HG03461	HG03461	2018-07-18	2	MSL	AFR	1847	3	BAFF
344	HG03461	HG03461	2018-07-18	2	MSL	AFR	1848	3	DEX
344	HG03461	HG03461	2018-07-18	2	MSL	AFR	1849	3	ETOH
344	HG03461	HG03461	2018-07-18	2	MSL	AFR	1850	3	GARD
344	HG03461	HG03461	2018-07-18	2	MSL	AFR	1851	3	IFNG
344	HG03461	HG03461	2018-07-18	2	MSL	AFR	1852	3	IGF1
344	HG03461	HG03461	2018-07-18	2	MSL	AFR	1853	3	TUNIC
344	HG03461	HG03461	2018-07-18	2	MSL	AFR	1854	3	H20
345	HG03469	HG03469	2018-07-18	1	MSL	AFR	1855	3	BAFF
345	HG03469	HG03469	2018-07-18	1	MSL	AFR	1856	3	DEX
345	HG03469	HG03469	2018-07-18	1	MSL	AFR	1857	3	ETOH
345	HG03469	HG03469	2018-07-18	1	MSL	AFR	1858	3	GARD
345	HG03469	HG03469	2018-07-18	1	MSL	AFR	1859	3	IFNG
345	HG03469	HG03469	2018-07-18	1	MSL	AFR	1860	3	IGF1
345	HG03469	HG03469	2018-07-18	1	MSL	AFR	1861	3	TUNIC
345	HG03469	HG03469	2018-07-18	1	MSL	AFR	1862	3	H20
357	HG00278	HG00278	2018-07-31	1	FIN	EUR	1863	3	BAFF
357	HG00278	HG00278	2018-07-31	1	FIN	EUR	1864	3	DEX
357	HG00278	HG00278	2018-07-31	1	FIN	EUR	1865	3	ETOH
357	HG00278	HG00278	2018-07-31	1	FIN	EUR	1866	3	GARD
357	HG00278	HG00278	2018-07-31	1	FIN	EUR	1867	3	IFNG
357	HG00278	HG00278	2018-07-31	1	FIN	EUR	1868	3	IGF1
357	HG00278	HG00278	2018-07-31	1	FIN	EUR	1869	3	TUNIC
357	HG00278	HG00278	2018-07-31	1	FIN	EUR	1870	3	H20
364	HG00372	HG00372	2018-07-31	1	FIN	EUR	1871	3	BAFF
364	HG00372	HG00372	2018-07-31	1	FIN	EUR	1872	3	GARD
364	HG00372	HG00372	2018-07-31	1	FIN	EUR	1873	3	IFNG
364	HG00372	HG00372	2018-07-31	1	FIN	EUR	1874	3	H20
366	HG01529	HG01529	2018-07-31	1	IBS	EUR	1875	3	BAFF
366	HG01529	HG01529	2018-07-31	1	IBS	EUR	1876	3	DEX
366	HG01529	HG01529	2018-07-31	1	IBS	EUR	1877	3	ETOH
366	HG01529	HG01529	2018-07-31	1	IBS	EUR	1878	3	GARD
366	HG01529	HG01529	2018-07-31	1	IBS	EUR	1879	3	IFNG
366	HG01529	HG01529	2018-07-31	1	IBS	EUR	1880	3	IGF1
376	GM11881	GM11881	2018-08-01	1	CEU	EUR	1881	3	BAFF
376	GM11881	GM11881	2018-08-01	1	CEU	EUR	1882	3	DEX
376	GM11881	GM11881	2018-08-01	1	CEU	EUR	1883	3	ETOH
376	GM11881	GM11881	2018-08-01	1	CEU	EUR	1884	3	GARD
376	GM11881	GM11881	2018-08-01	1	CEU	EUR	1885	3	IFNG
376	GM11881	GM11881	2018-08-01	1	CEU	EUR	1886	3	IGF1
376	GM11881	GM11881	2018-08-01	1	CEU	EUR	1887	3	TUNIC
376	GM11881	GM11881	2018-08-01	1	CEU	EUR	1888	3	H20
378	GM18511	NA18511	2018-08-01	2	YRI	AFR	1889	3	BAFF
378	GM18511	NA18511	2018-08-01	2	YRI	AFR	1890	3	DEX
378	GM18511	NA18511	2018-08-01	2	YRI	AFR	1891	3	ETOH
378	GM18511	NA18511	2018-08-01	2	YRI	AFR	1892	3	GARD
378	GM18511	NA18511	2018-08-01	2	YRI	AFR	1893	3	IGF1
378	GM18511	NA18511	2018-08-01	2	YRI	AFR	1894	3	H20
383	GM19235	NA19235	2018-08-01	2	YRI	AFR	1895	3	BAFF
383	GM19235	NA19235	2018-08-01	2	YRI	AFR	1896	3	ETOH
383	GM19235	NA19235	2018-08-01	2	YRI	AFR	1897	3	GARD
383	GM19235	NA19235	2018-08-01	2	YRI	AFR	1898	3	IGF1
383	GM19235	NA19235	2018-08-01	2	YRI	AFR	1899	3	TUNIC
383	GM19235	NA19235	2018-08-01	2	YRI	AFR	1900	3	H20
385	GM19371	NA19371	2018-08-01	1	LWK	AFR	1901	3	DEX
385	GM19371	NA19371	2018-08-01	1	LWK	AFR	1902	3	ETOH
385	GM19371	NA19371	2018-08-01	1	LWK	AFR	1903	3	GARD
385	GM19371	NA19371	2018-08-01	1	LWK	AFR	1904	3	IFNG
385	GM19371	NA19371	2018-08-01	1	LWK	AFR	1905	3	TUNIC
385	GM19371	NA19371	2018-08-01	1	LWK	AFR	1906	3	H20
386	GM19372	NA19372	2018-08-01	1	LWK	AFR	1907	3	BAFF
386	GM19372	NA19372	2018-08-01	1	LWK	AFR	1908	3	DEX
386	GM19372	NA19372	2018-08-01	1	LWK	AFR	1909	3	ETOH
386	GM19372	NA19372	2018-08-01	1	LWK	AFR	1910	3	GARD
386	GM19372	NA19372	2018-08-01	1	LWK	AFR	1911	3	IFNG
386	GM19372	NA19372	2018-08-01	1	LWK	AFR	1912	3	IGF1
386	GM19372	NA19372	2018-08-01	1	LWK	AFR	1913	3	TUNIC
386	GM19372	NA19372	2018-08-01	1	LWK	AFR	1914	3	H20
389	GM20585	NA20585	2018-08-01	2	TSI	EUR	1915	3	BAFF
389	GM20585	NA20585	2018-08-01	2	TSI	EUR	1916	3	DEX
389	GM20585	NA20585	2018-08-01	2	TSI	EUR	1917	3	ETOH
389	GM20585	NA20585	2018-08-01	2	TSI	EUR	1918	3	GARD
389	GM20585	NA20585	2018-08-01	2	TSI	EUR	1919	3	IFNG
389	GM20585	NA20585	2018-08-01	2	TSI	EUR	1920	3	IGF1
389	GM20585	NA20585	2018-08-01	2	TSI	EUR	1921	3	TUNIC
389	GM20585	NA20585	2018-08-01	2	TSI	EUR	1922	3	H20
397	HG03351	HG03351	2018-08-01	2	ESN	AFR	1923	3	BAFF
397	HG03351	HG03351	2018-08-01	2	ESN	AFR	1924	3	DEX
397	HG03351	HG03351	2018-08-01	2	ESN	AFR	1925	3	ETOH
397	HG03351	HG03351	2018-08-01	2	ESN	AFR	1926	3	GARD
397	HG03351	HG03351	2018-08-01	2	ESN	AFR	1927	3	IFNG
397	HG03351	HG03351	2018-08-01	2	ESN	AFR	1928	3	IGF1
397	HG03351	HG03351	2018-08-01	2	ESN	AFR	1929	3	TUNIC
397	HG03351	HG03351	2018-08-01	2	ESN	AFR	1930	3	H20
398	HG03376	HG03376	2018-08-01	1	MSL	AFR	1931	3	BAFF
398	HG03376	HG03376	2018-08-01	1	MSL	AFR	1932	3	DEX
398	HG03376	HG03376	2018-08-01	1	MSL	AFR	1933	3	ETOH
398	HG03376	HG03376	2018-08-01	1	MSL	AFR	1934	3	GARD
398	HG03376	HG03376	2018-08-01	1	MSL	AFR	1935	3	IFNG
398	HG03376	HG03376	2018-08-01	1	MSL	AFR	1936	3	IGF1
398	HG03376	HG03376	2018-08-01	1	MSL	AFR	1937	3	TUNIC
398	HG03376	HG03376	2018-08-01	1	MSL	AFR	1938	3	H20
399	HG03398	HG03398	2018-08-01	2	MSL	AFR	1939	3	BAFF
399	HG03398	HG03398	2018-08-01	2	MSL	AFR	1940	3	DEX
399	HG03398	HG03398	2018-08-01	2	MSL	AFR	1941	3	ETOH
399	HG03398	HG03398	2018-08-01	2	MSL	AFR	1942	3	GARD
399	HG03398	HG03398	2018-08-01	2	MSL	AFR	1943	3	IGF1
399	HG03398	HG03398	2018-08-01	2	MSL	AFR	1944	3	TUNIC
399	HG03398	HG03398	2018-08-01	2	MSL	AFR	1945	3	H20
39	GM20799	NA20799	2018-04-11	2	TSI	EUR	1946	3	ETOH
39	GM20799	NA20799	2018-04-11	2	TSI	EUR	1947	3	GARD
39	GM20799	NA20799	2018-04-11	2	TSI	EUR	1948	3	H20
402	HG00138	HG00138	2018-08-14	1	GBR	EUR	1949	3	ACRYL
402	HG00138	HG00138	2018-08-14	1	GBR	EUR	1950	3	BAFF
402	HG00138	HG00138	2018-08-14	1	GBR	EUR	1951	3	BPA
402	HG00138	HG00138	2018-08-14	1	GBR	EUR	1952	3	DEX
402	HG00138	HG00138	2018-08-14	1	GBR	EUR	1953	3	ETOH
402	HG00138	HG00138	2018-08-14	1	GBR	EUR	1954	3	FSL1
402	HG00138	HG00138	2018-08-14	1	GBR	EUR	1955	3	IGF1
402	HG00138	HG00138	2018-08-14	1	GBR	EUR	1956	3	PFOA
402	HG00138	HG00138	2018-08-14	1	GBR	EUR	1957	3	TUNIC
402	HG00138	HG00138	2018-08-14	1	GBR	EUR	1958	3	H20
403	HG00146	HG00146	2018-08-14	2	GBR	EUR	1959	3	ACRYL
403	HG00146	HG00146	2018-08-14	2	GBR	EUR	1960	3	IFNG
403	HG00146	HG00146	2018-08-14	2	GBR	EUR	1961	3	PFOA
407	HG00277	HG00277	2018-08-14	1	FIN	EUR	1962	3	ACRYL
407	HG00277	HG00277	2018-08-14	1	FIN	EUR	1963	3	DEX
407	HG00277	HG00277	2018-08-14	1	FIN	EUR	1964	3	IFNG
407	HG00277	HG00277	2018-08-14	1	FIN	EUR	1965	3	PFOA
407	HG00277	HG00277	2018-08-14	1	FIN	EUR	1966	3	TUNIC
408	HG00280	HG00280	2018-08-14	1	FIN	EUR	1967	3	DEX
408	HG00280	HG00280	2018-08-14	1	FIN	EUR	1968	3	GARD
408	HG00280	HG00280	2018-08-14	1	FIN	EUR	1969	3	IGF1
410	HG00338	HG00338	2018-08-14	1	FIN	EUR	1970	3	PFOA
410	HG00338	HG00338	2018-08-14	1	FIN	EUR	1971	3	TUNIC
412	HG00378	HG00378	2018-08-14	2	FIN	EUR	1972	3	BAFF
412	HG00378	HG00378	2018-08-14	2	FIN	EUR	1973	3	DEX
412	HG00378	HG00378	2018-08-14	2	FIN	EUR	1974	3	ETOH
412	HG00378	HG00378	2018-08-14	2	FIN	EUR	1975	3	TUNIC
412	HG00378	HG00378	2018-08-14	2	FIN	EUR	1976	3	H20
414	HG01681	HG01681	2018-08-14	2	IBS	EUR	1977	3	ACRYL
414	HG01681	HG01681	2018-08-14	2	IBS	EUR	1978	3	ETOH
414	HG01681	HG01681	2018-08-14	2	IBS	EUR	1979	3	PFOA
414	HG01681	HG01681	2018-08-14	2	IBS	EUR	1980	3	TUNIC
414	HG01681	HG01681	2018-08-14	2	IBS	EUR	1981	3	H20
416	HG01785	HG01785	2018-08-14	1	IBS	EUR	1982	3	BAFF
416	HG01785	HG01785	2018-08-14	1	IBS	EUR	1983	3	IFNG
427	GM12249	GM12249	2018-08-15	2	CEU	EUR	1984	3	ACRYL
427	GM12249	GM12249	2018-08-15	2	CEU	EUR	1985	3	ETOH
427	GM12249	GM12249	2018-08-15	2	CEU	EUR	1986	3	FSL1
427	GM12249	GM12249	2018-08-15	2	CEU	EUR	1987	3	GARD
427	GM12249	GM12249	2018-08-15	2	CEU	EUR	1988	3	IFNG
427	GM12249	GM12249	2018-08-15	2	CEU	EUR	1989	3	IGF1
427	GM12249	GM12249	2018-08-15	2	CEU	EUR	1990	3	PFOA
427	GM12249	GM12249	2018-08-15	2	CEU	EUR	1991	3	TUNIC
427	GM12249	GM12249	2018-08-15	2	CEU	EUR	1992	3	H20
429	GM18521	NA18521	2018-08-15	1	YRI	AFR	1993	3	ACRYL
429	GM18521	NA18521	2018-08-15	1	YRI	AFR	1994	3	BAFF
429	GM18521	NA18521	2018-08-15	1	YRI	AFR	1995	3	BPA
429	GM18521	NA18521	2018-08-15	1	YRI	AFR	1996	3	DEX
429	GM18521	NA18521	2018-08-15	1	YRI	AFR	1997	3	ETOH
429	GM18521	NA18521	2018-08-15	1	YRI	AFR	1998	3	FSL1
[truncated: 1,888 more rows]
