# Supplementary material for: Diverse environmental perturbations reveal the evolution and context-dependency of genetic effects on gene expression levels
Source: HighWire-hosted journal article supplement (doi:10.1101/gr.276430.121), 2022-10-13
Supplement: Supplemental_Table_S4.xlsx [file Supplemental_Table_S4.xlsx]

## Sheet: Sheet1
Table S4. List of individuals in our dataset for whom whole genome sequencing data was available
NYGC_sample_ID
HG00101
HG00102
HG00103
HG00105
HG00108
HG00110
HG00111
HG00116
HG00117
HG00121
HG00129
HG00131
HG00133
HG00138
HG00140
HG00142
HG00143
HG00145
HG00146
HG00149
HG00150
HG00154
HG00155
HG00157
HG00158
HG00171
HG00177
HG00178
HG00179
HG00181
HG00183
HG00185
HG00187
HG00189
HG00190
HG00232
HG00234
HG00238
HG00240
HG00242
HG00246
HG00250
HG00251
HG00252
HG00253
HG00254
HG00256
HG00257
HG00259
HG00260
HG00262
HG00263
HG00264
HG00267
HG00268
HG00269
HG00272
HG00273
HG00274
HG00277
HG00278
HG00280
HG00281
HG00282
HG00285
HG00288
HG00290
HG00304
HG00306
HG00308
HG00309
HG00310
HG00311
HG00313
HG00315
HG00319
HG00320
HG00321
HG00323
HG00325
HG00327
HG00329
HG00332
HG00335
HG00336
HG00337
HG00338
HG00339
HG00341
HG00343
HG00344
HG00350
HG00351
HG00357
HG00358
HG00360
HG00361
HG00364
HG00365
HG00366
HG00367
HG00368
HG00369
HG00372
HG00373
HG00376
HG00378
HG00380
HG00381
HG00382
HG00383
HG00384
HG01500
HG01504
HG01511
HG01512
HG01519
HG01523
HG01526
HG01529
HG01536
HG01605
HG01608
HG01611
HG01614
HG01616
HG01620
HG01622
HG01625
HG01633
HG01669
HG01674
HG01678
HG01681
HG01683
HG01695
HG01697
HG01700
HG01703
HG01706
HG01761
HG01765
HG01770
HG01774
HG01776
HG01781
HG01785
HG01789
HG02219
HG02221
HG02224
HG02229
HG02232
HG02236
HG02240
HG02466
HG02563
HG02568
HG02572
HG02582
HG02587
HG02589
HG02595
HG02612
HG02613
HG02622
HG02625
HG02642
HG02646
HG02666
HG02680
HG02704
HG02721
HG02759
HG02762
HG02770
HG02771
HG02800
HG02806
HG02809
HG02811
HG02813
HG02817
HG02819
HG02836
HG02841
HG02852
HG02854
HG02861
HG02869
HG02879
HG02883
HG02884
HG02887
HG02895
HG02938
HG02947
HG02952
HG02965
HG02971
HG02973
HG02977
HG02984
HG03026
HG03034
HG03040
HG03050
HG03056
HG03061
HG03065
HG03066
HG03069
HG03072
HG03074
HG03078
HG03079
HG03082
HG03086
HG03088
HG03091
HG03095
HG03098
HG03100
HG03105
HG03111
HG03116
HG03117
HG03120
HG03128
HG03134
HG03137
HG03159
HG03168
HG03189
HG03199
HG03209
HG03212
HG03248
HG03265
HG03270
HG03294
HG03302
HG03305
HG03311
HG03343
HG03351
HG03354
HG03363
HG03368
HG03371
HG03374
HG03376
HG03380
HG03401
HG03410
HG03419
HG03428
HG03432
HG03433
HG03437
HG03439
HG03445
HG03446
HG03458
HG03461
HG03469
HG03470
HG03472
HG03486
HG03499
HG03515
HG03517
HG03521
HG03538
HG03548
HG03559
HG03563
HG03565
HG03567
HG03572
HG03577
HG03584
NA06989
NA07000
NA07037
NA07048
NA07349
NA10837
NA10847
NA10856
NA10860
NA11881
NA11933
NA12003
NA12056
NA12156
NA12234
NA12249
NA12335
NA12400
NA12413
NA12489
NA12740
NA12752
NA12767
NA12814
NA12818
NA12832
NA12873
NA12877
NA18484
NA18485
NA18498
NA18502
NA18503
NA18506
NA18510
NA18511
NA18516
NA18519
NA18521
NA18854
NA18855
NA18859
NA18864
NA18869
NA18875
NA18876
NA18879
NA18881
NA18911
NA18913
NA18915
NA18917
NA18923
NA18934
NA19017
NA19023
NA19026
NA19028
NA19031
NA19036
NA19038
NA19041
NA19042
NA19043
NA19094
NA19097
NA19102
NA19109
NA19115
NA19118
NA19123
NA19128
NA19132
NA19139
NA19140
NA19145
NA19146
NA19150
NA19154
NA19159
NA19173
NA19189
NA19202
NA19203
NA19223
NA19225
NA19235
NA19248
NA19258
NA19307
NA19308
NA19315
NA19317
NA19318
NA19319
NA19320
NA19321
NA19323
NA19327
NA19328
NA19332
NA19350
NA19351
NA19355
NA19360
NA19372
NA19377
NA19378
NA19380
NA19383
NA19384
NA19385
NA19391
NA19393
NA19395
NA19429
NA19437
NA19440
NA19448
NA19451
NA19452
NA19474
NA19475
NA20510
NA20511
NA20517
NA20521
NA20522
NA20528
NA20531
NA20532
NA20534
NA20535
NA20536
NA20542
NA20585
NA20756
NA20758
NA20759
NA20760
NA20766
NA20769
NA20771
NA20772
NA20773
NA20774
NA20778
NA20783
NA20790
NA20795
NA20796
NA20797
NA20798
NA20799
NA20800
NA20801
NA20803
NA20804
NA20806
NA20807
NA20809
NA20810
NA20811
NA20813
NA20818
NA20819
NA20821
NA20822
NA20826
NA20827
NA20828
NA20832
