# Supplementary material for: Diverse environmental perturbations reveal the evolution and context-dependency of genetic effects on gene expression levels
Source: HighWire-hosted journal article supplement (doi:10.1101/gr.276430.121), 2022-10-13
Supplement: Supplemental_Table_S5.xlsx [file Supplemental_Table_S5.xlsx]

## Sheet: Sheet1
Table S5. Results summarized by treatment-control pair
						Full sample size						All environments subsampled to n=100
Treatment	Control	Treatment-associated genes (limma FDR<10%)	Treatment-associated genes (mashR LFSR<10%)	Response eQTL (mashR LFSR<10%)	Genes with response eQTL (mashR LFSR<10%)	Mean of h2 in control condition	SD of h2 in control condition	Mean of h2 in treatment condition	SD of h2 in treatment condition	P-value comparing h2 in treatment vs control	Q-value comparing h2 in treatment vs control	Mean of h2 in control condition	SD of h2 in control condition	Mean of h2 in treatment condition	SD of h2 in treatment condition	P-value comparing h2 in treatment vs control	Q-value comparing h2 in treatment vs control
ACRYL	Water	797	4418	1831	1326	0.111105	0.249953	0.241893	0.396273	7.87413e-170	2.86332e-170	0.15545	0.319369	0.242774	0.396958	2.35338e-66	4.31453e-66
BAFF	Water	195	5035	1324	966	0.111105	0.249953	0.0793398	0.206578	9.79547e-23	6.23348e-23	0.15545	0.319369	0.170202	0.332119	0.00125474	0.00153357
BPA	Water	717	4400	1741	1289	0.111105	0.249953	0.337069	0.441207	0	0	0.15545	0.319369	0.327855	0.440604	8.49485e-218	3.11478e-217
ETOH	Water	14	4050	1341	962	0.111105	0.249953	0.121487	0.257148	0.0043147	0.00353021	0.15545	0.319369	0.146245	0.311673	0.037644	0.037644
FSL-1	Water	102	3513	2385	1660	0.111105	0.249953	0.269154	0.403448	1.46402e-238	3.99279e-239	0.15545	0.319369	0.336228	0.442831	4.20878e-237	2.31483e-236
GARD	Water	700	4848	1373	1004	0.111105	0.249953	0.155916	0.299341	1.19991e-30	6.54498e-31	0.15545	0.319369	0.300465	0.424165	1.51138e-163	4.15629e-163
IFNG	Water	532	4823	1422	1005	0.111105	0.249953	0.114146	0.250241	0.38615	0.38615	0.15545	0.319369	0.18158	0.344605	2.11454e-08	2.90749e-08
IGF1	Water	0	5082	1334	954	0.111105	0.249953	0.115093	0.255695	0.287035	0.260941	0.15545	0.319369	0.112151	0.268566	1.58499e-25	2.49069e-25
PFOA	Water	801	4400	1730	1274	0.111105	0.249953	0.397981	0.464277	0	0	0.15545	0.319369	0.36007	0.45466	1.03621e-290	1.13983e-289
DEX	Ethanol	3214	3990	2240	1522	0.121487	0.257148	0.102224	0.238846	4.42328e-08	3.21693e-08	0.146245	0.311673	0.231833	0.385595	2.83029e-67	6.22664e-67
TUNIC	Ethanol	60	1172	805	639	0.121487	0.257148	0.214588	0.346339	2.86786e-103	1.30357e-103	0.146245	0.311673	0.157741	0.318044	0.0092806	0.0102087
