# Supplementary material for: Diverse environmental perturbations reveal the evolution and context-dependency of genetic effects on gene expression levels
Source: HighWire-hosted journal article supplement (doi:10.1101/gr.276430.121), 2022-10-13
Supplement: Supplemental_Table_S6.xlsx [file Supplemental_Table_S6.xlsx]

## Sheet: Sheet1
Table S6. Results from GSEA for treatment effects; all categories passing a 20% FDR are reported, for treatments where no categories passed this threshold, the top 20 categories are reported
ID	Description	Set size	Enrichment score	NES	Enrichment p-value	Enrichment q-value	Treatment
GO:0006749	glutathione metabolic process	31	0.622083	1.5971	0.000999001	0.189224	Tunicamycin
GO:0006984	ER-nucleus signaling pathway	40	0.618057	1.62751	0.000999001	0.189224	Tunicamycin
GO:0006986	response to unfolded protein	141	0.580831	1.65335	0.000999001	0.189224	Tunicamycin
GO:0030968	endoplasmic reticulum unfolded protein response	101	0.537674	1.50081	0.000999001	0.189224	Tunicamycin
GO:0032637	interleukin-8 production	37	0.622505	1.62628	0.000999001	0.189224	Tunicamycin
GO:0032677	regulation of interleukin-8 production	35	0.653296	1.69661	0.000999001	0.189224	Tunicamycin
GO:0034620	cellular response to unfolded protein	112	0.551059	1.54862	0.000999001	0.189224	Tunicamycin
GO:0034976	response to endoplasmic reticulum stress	237	0.489814	1.42154	0.000999001	0.189224	Tunicamycin
GO:0035966	response to topologically incorrect protein	162	0.558091	1.5978	0.000999001	0.189224	Tunicamycin
GO:0035967	cellular response to topologically incorrect protein	132	0.520138	1.47492	0.000999001	0.189224	Tunicamycin
GO:0043525	positive regulation of neuron apoptotic process	40	0.608633	1.60269	0.000999001	0.189224	Tunicamycin
GO:0048568	embryonic organ development	182	0.479752	1.38079	0.000999001	0.189224	Tunicamycin
GO:0070059	intrinsic apoptotic signaling pathway in response to endoplasmic reticulum stress	51	0.670429	1.79631	0.000999001	0.189224	Tunicamycin
GO:0120163	negative regulation of cold-induced thermogenesis	28	0.636888	1.61805	0.001	0.189224	Tunicamycin
GO:1902235	regulation of endoplasmic reticulum stress-induced intrinsic apoptotic signaling pathway	26	0.64178	1.61659	0.00100301	0.189224	Tunicamycin
GO:0032757	positive regulation of interleukin-8 production	23	0.778867	1.93449	0.00100402	0.189224	Tunicamycin
GO:0045661	regulation of myoblast differentiation	23	0.678136	1.68431	0.00100402	0.189224	Tunicamycin
GO:0036003	positive regulation of transcription from RNA polymerase II promoter in response to stress	21	0.783226	1.92858	0.00100503	0.189224	Tunicamycin
GO:0044273	sulfur compound catabolic process	24	0.733033	1.82642	0.00100503	0.189224	Tunicamycin
GO:0010955	negative regulation of protein processing	19	0.700573	1.70129	0.00100604	0.189224	Tunicamycin
GO:1903318	negative regulation of protein maturation	19	0.700573	1.70129	0.00100604	0.189224	Tunicamycin
GO:0045746	negative regulation of Notch signaling pathway	17	0.731227	1.75315	0.00100705	0.189224	Tunicamycin
GO:0036499	PERK-mediated unfolded protein response	16	0.812237	1.93162	0.0010101	0.189224	Tunicamycin
GO:0070841	inclusion body assembly	16	0.752001	1.78837	0.0010101	0.189224	Tunicamycin
GO:0006983	ER overload response	12	0.844247	1.93547	0.00102249	0.189224	Tunicamycin
GO:0015813	L-glutamate transmembrane transport	12	0.797915	1.82925	0.00102249	0.189224	Tunicamycin
GO:0010823	negative regulation of mitochondrion organization	42	0.615174	1.62776	0.000999001	0.444966	Acrylamide
GO:0030029	actin filament-based process	400	0.432328	1.26554	0.000999001	0.444966	Acrylamide
GO:0030036	actin cytoskeleton organization	371	0.432539	1.26362	0.000999001	0.444966	Acrylamide
GO:0031532	actin cytoskeleton reorganization	63	0.567179	1.54574	0.000999001	0.444966	Acrylamide
GO:0035050	embryonic heart tube development	34	0.601468	1.55858	0.000999001	0.444966	Acrylamide
GO:0042267	natural killer cell mediated cytotoxicity	31	0.617613	1.58677	0.000999001	0.444966	Acrylamide
GO:0045596	negative regulation of cell differentiation	332	0.432741	1.26183	0.000999001	0.444966	Acrylamide
GO:0050900	leukocyte migration	206	0.454762	1.31073	0.000999001	0.444966	Acrylamide
GO:0072523	purine-containing compound catabolic process	31	0.624412	1.60424	0.000999001	0.444966	Acrylamide
GO:0010226	response to lithium ion	13	0.759093	1.75247	0.00102669	0.444966	Acrylamide
GO:0002088	lens development in camera-type eye	34	0.581992	1.50811	0.001998	0.528768	Acrylamide
GO:0043551	regulation of phosphatidylinositol 3-kinase activity	34	0.58921	1.52682	0.001998	0.528768	Acrylamide
GO:0048598	embryonic morphogenesis	253	0.421821	1.22108	0.001998	0.528768	Acrylamide
GO:0002228	natural killer cell mediated immunity	32	0.5981	1.543	0.002997	0.528768	Acrylamide
GO:0021987	cerebral cortex development	65	0.525616	1.43458	0.002997	0.528768	Acrylamide
GO:0035023	regulation of Rho protein signal transduction	70	0.519025	1.4234	0.002997	0.528768	Acrylamide
GO:0051093	negative regulation of developmental process	440	0.410301	1.20427	0.002997	0.528768	Acrylamide
GO:0051897	positive regulation of protein kinase B signaling	70	0.505859	1.38729	0.002997	0.528768	Acrylamide
GO:0006195	purine nucleotide catabolic process	26	0.639205	1.618	0.003	0.528768	Acrylamide
GO:0002695	negative regulation of leukocyte activation	103	0.494317	1.39142	0.000999001	0.21233	BAFF
GO:0006937	regulation of muscle contraction	63	0.546026	1.49118	0.000999001	0.21233	BAFF
GO:0006954	inflammatory response	334	0.440148	1.29173	0.000999001	0.21233	BAFF
GO:0007162	negative regulation of cell adhesion	150	0.46105	1.3206	0.000999001	0.21233	BAFF
GO:0022408	negative regulation of cell-cell adhesion	102	0.519416	1.46109	0.000999001	0.21233	BAFF
GO:0030217	T cell differentiation	153	0.463708	1.32897	0.000999001	0.21233	BAFF
GO:0030595	leukocyte chemotaxis	93	0.512895	1.43567	0.000999001	0.21233	BAFF
GO:0045581	negative regulation of T cell differentiation	29	0.645904	1.65585	0.000999001	0.21233	BAFF
GO:0050866	negative regulation of cell activation	110	0.510403	1.44375	0.000999001	0.21233	BAFF
GO:0050868	negative regulation of T cell activation	69	0.541384	1.48725	0.000999001	0.21233	BAFF
GO:0072676	lymphocyte migration	54	0.591486	1.59591	0.000999001	0.21233	BAFF
GO:1903038	negative regulation of leukocyte cell-cell adhesion	74	0.535139	1.4783	0.000999001	0.21233	BAFF
GO:1903707	negative regulation of hemopoiesis	84	0.511203	1.4221	0.000999001	0.21233	BAFF
GO:0002548	monocyte chemotaxis	24	0.634117	1.60018	0.001001	0.21233	BAFF
GO:0006026	aminoglycan catabolic process	24	0.650804	1.64229	0.001001	0.21233	BAFF
GO:0048247	lymphocyte chemotaxis	23	0.73555	1.84219	0.00100402	0.21233	BAFF
GO:0030212	hyaluronan metabolic process	19	0.691849	1.69023	0.00100705	0.21233	BAFF
GO:1903524	positive regulation of blood circulation	20	0.695867	1.71342	0.00100705	0.21233	BAFF
GO:0071715	icosanoid transport	17	0.730126	1.75929	0.00101112	0.21233	BAFF
GO:1901571	fatty acid derivative transport	17	0.730126	1.75929	0.00101112	0.21233	BAFF
GO:0044070	regulation of anion transport	45	0.582584	1.52902	0.000999001	0.492339	BPA
GO:0006939	smooth muscle contraction	39	0.567451	1.47828	0.001	0.492339	BPA
GO:0032008	positive regulation of TOR signaling	33	0.62473	1.60759	0.001	0.492339	BPA
GO:0043551	regulation of phosphatidylinositol 3-kinase activity	34	0.614155	1.58185	0.001	0.492339	BPA
GO:0097756	negative regulation of blood vessel diameter	24	0.665056	1.65651	0.001001	0.492339	BPA
GO:1903793	positive regulation of anion transport	24	0.701607	1.74756	0.001001	0.492339	BPA
GO:0006940	regulation of smooth muscle contraction	22	0.672355	1.65039	0.00100402	0.492339	BPA
GO:0042310	vasoconstriction	22	0.700848	1.72033	0.00100402	0.492339	BPA
GO:0019229	regulation of vasoconstriction	16	0.728322	1.71935	0.0010142	0.492339	BPA
GO:0032892	positive regulation of organic acid transport	14	0.722598	1.67326	0.00102145	0.492339	BPA
GO:0006333	chromatin assembly or disassembly	122	0.46139	1.28514	0.001998	0.561968	BPA
GO:0043270	positive regulation of ion transport	106	0.487757	1.34756	0.001998	0.561968	BPA
GO:0043550	regulation of lipid kinase activity	41	0.562982	1.47274	0.001998	0.561968	BPA
GO:0061448	connective tissue development	106	0.490164	1.35421	0.001998	0.561968	BPA
GO:0002228	natural killer cell mediated immunity	32	0.618364	1.58398	0.002	0.561968	BPA
GO:0042267	natural killer cell mediated cytotoxicity	31	0.607942	1.55049	0.002	0.561968	BPA
GO:0090183	regulation of kidney development	21	0.662687	1.61969	0.00201207	0.561968	BPA
GO:0045987	positive regulation of smooth muscle contraction	11	0.747709	1.66483	0.00209864	0.561968	BPA
GO:0031497	chromatin assembly	101	0.490567	1.35241	0.002997	0.621775	BPA
GO:0038034	signal transduction in absence of ligand	43	0.54698	1.43209	0.002997	0.621775	BPA
GO:0001654	eye development	144	0.4625	1.3132	0.000999001	0.205492	Ethanol
GO:0003205	cardiac chamber development	66	0.529509	1.45277	0.000999001	0.205492	Ethanol
GO:0003279	cardiac septum development	52	0.563891	1.52629	0.000999001	0.205492	Ethanol
GO:0003281	ventricular septum development	35	0.591042	1.55238	0.000999001	0.205492	Ethanol
GO:0006720	isoprenoid metabolic process	45	0.570734	1.52991	0.000999001	0.205492	Ethanol
GO:0007186	G protein-coupled receptor signaling pathway	260	0.446487	1.29732	0.000999001	0.205492	Ethanol
GO:0007423	sensory organ development	208	0.469172	1.35166	0.000999001	0.205492	Ethanol
GO:0032675	regulation of interleukin-6 production	72	0.513888	1.41508	0.000999001	0.205492	Ethanol
GO:0042471	ear morphogenesis	36	0.598809	1.57906	0.000999001	0.205492	Ethanol
GO:0042632	cholesterol homeostasis	40	0.579723	1.5436	0.000999001	0.205492	Ethanol
GO:0043583	ear development	77	0.506121	1.39741	0.000999001	0.205492	Ethanol
GO:0045165	cell fate commitment	77	0.508797	1.4048	0.000999001	0.205492	Ethanol
GO:0046717	acid secretion	40	0.573645	1.52742	0.000999001	0.205492	Ethanol
GO:0048598	embryonic morphogenesis	253	0.44588	1.29425	0.000999001	0.205492	Ethanol
GO:0048646	anatomical structure formation involved in morphogenesis	472	0.401495	1.18515	0.000999001	0.205492	Ethanol
GO:0048880	sensory system development	145	0.466065	1.32376	0.000999001	0.205492	Ethanol
GO:0055092	sterol homeostasis	40	0.579723	1.5436	0.000999001	0.205492	Ethanol
GO:0090596	sensory organ morphogenesis	88	0.541085	1.50434	0.000999001	0.205492	Ethanol
GO:0150063	visual system development	145	0.466065	1.32376	0.000999001	0.205492	Ethanol
GO:0002088	lens development in camera-type eye	34	0.592598	1.54797	0.001	0.205492	Ethanol
GO:0001505	regulation of neurotransmitter levels	155	0.459664	1.32644	0.000999001	0.399847	FSL-1
GO:0001655	urogenital system development	145	0.482925	1.39137	0.000999001	0.399847	FSL-1
GO:0003014	renal system process	45	0.583256	1.5683	0.000999001	0.399847	FSL-1
GO:0015711	organic anion transport	216	0.461563	1.34668	0.000999001	0.399847	FSL-1
GO:0032635	interleukin-6 production	77	0.509149	1.4212	0.000999001	0.399847	FSL-1
GO:0032675	regulation of interleukin-6 production	72	0.523812	1.45697	0.000999001	0.399847	FSL-1
GO:0032720	negative regulation of tumor necrosis factor production	33	0.606217	1.59414	0.000999001	0.399847	FSL-1
GO:0061050	regulation of cell growth involved in cardiac muscle cell development	13	0.782164	1.83229	0.00103306	0.399847	FSL-1
GO:0001990	regulation of systemic arterial blood pressure by hormone	10	0.815414	1.83719	0.00105932	0.399847	FSL-1
GO:0007218	neuropeptide signaling pathway	10	0.794563	1.79021	0.00105932	0.399847	FSL-1
GO:0010878	cholesterol storage	10	0.816564	1.83978	0.00105932	0.399847	FSL-1
GO:1902894	negative regulation of pri-miRNA transcription by RNA polymerase II	10	0.803537	1.81043	0.00105932	0.399847	FSL-1
GO:0001822	kidney development	124	0.48603	1.38852	0.001998	0.399847	FSL-1
GO:0006820	anion transport	279	0.421415	1.23901	0.001998	0.399847	FSL-1
GO:0007600	sensory perception	155	0.455651	1.31486	0.001998	0.399847	FSL-1
GO:0015748	organophosphate ester transport	61	0.51058	1.40333	0.001998	0.399847	FSL-1
GO:0032102	negative regulation of response to external stimulus	149	0.45558	1.31408	0.001998	0.399847	FSL-1
GO:0072001	renal system development	126	0.4772	1.36332	0.001998	0.399847	FSL-1
GO:0032715	negative regulation of interleukin-6 production	25	0.627521	1.60454	0.002	0.399847	FSL-1
GO:0050886	endocrine process	23	0.637677	1.61127	0.00200803	0.399847	FSL-1
GO:0000165	MAPK cascade	495	0.473618	1.33664	0.000999001	0.0103478	Gardiquimod
GO:0001101	response to acid chemical	174	0.489824	1.34117	0.000999001	0.0103478	Gardiquimod
GO:0001525	angiogenesis	220	0.478631	1.32086	0.000999001	0.0103478	Gardiquimod
GO:0001568	blood vessel development	304	0.448189	1.24854	0.000999001	0.0103478	Gardiquimod
GO:0001816	cytokine production	454	0.535674	1.50888	0.000999001	0.0103478	Gardiquimod
GO:0001817	regulation of cytokine production	413	0.541873	1.52333	0.000999001	0.0103478	Gardiquimod
GO:0001818	negative regulation of cytokine production	159	0.596851	1.62871	0.000999001	0.0103478	Gardiquimod
GO:0001819	positive regulation of cytokine production	271	0.55448	1.5406	0.000999001	0.0103478	Gardiquimod
GO:0001944	vasculature development	323	0.435218	1.21609	0.000999001	0.0103478	Gardiquimod
GO:0001959	regulation of cytokine-mediated signaling pathway	116	0.524304	1.41059	0.000999001	0.0103478	Gardiquimod
GO:0002221	pattern recognition receptor signaling pathway	130	0.515776	1.39967	0.000999001	0.0103478	Gardiquimod
GO:0002224	toll-like receptor signaling pathway	94	0.506574	1.34355	0.000999001	0.0103478	Gardiquimod
GO:0002237	response to molecule of bacterial origin	182	0.569645	1.56189	0.000999001	0.0103478	Gardiquimod
GO:0002250	adaptive immune response	238	0.507633	1.40457	0.000999001	0.0103478	Gardiquimod
GO:0002253	activation of immune response	386	0.456674	1.28263	0.000999001	0.0103478	Gardiquimod
GO:0002285	lymphocyte activation involved in immune response	116	0.547385	1.47269	0.000999001	0.0103478	Gardiquimod
GO:0002286	T cell activation involved in immune response	61	0.644432	1.67261	0.000999001	0.0103478	Gardiquimod
GO:0002367	cytokine production involved in immune response	60	0.65541	1.70158	0.000999001	0.0103478	Gardiquimod
GO:0002440	production of molecular mediator of immune response	129	0.514775	1.39607	0.000999001	0.0103478	Gardiquimod
GO:0002449	lymphocyte mediated immunity	141	0.515295	1.3999	0.000999001	0.0103478	Gardiquimod
GO:0002460	adaptive immune response based on somatic recombination of immune receptors built from immunoglobulin superfamily domains	155	0.561147	1.53054	0.000999001	0.0103478	Gardiquimod
GO:0002521	leukocyte differentiation	313	0.531224	1.48249	0.000999001	0.0103478	Gardiquimod
GO:0002683	negative regulation of immune system process	257	0.486396	1.34941	0.000999001	0.0103478	Gardiquimod
GO:0002685	regulation of leukocyte migration	97	0.590148	1.56845	0.000999001	0.0103478	Gardiquimod
GO:0002687	positive regulation of leukocyte migration	63	0.637418	1.65897	0.000999001	0.0103478	Gardiquimod
GO:0002688	regulation of leukocyte chemotaxis	53	0.591524	1.53113	0.000999001	0.0103478	Gardiquimod
GO:0002694	regulation of leukocyte activation	306	0.523391	1.45885	0.000999001	0.0103478	Gardiquimod
GO:0002695	negative regulation of leukocyte activation	103	0.535241	1.42709	0.000999001	0.0103478	Gardiquimod
GO:0002696	positive regulation of leukocyte activation	192	0.558586	1.53412	0.000999001	0.0103478	Gardiquimod
GO:0002697	regulation of immune effector process	234	0.54424	1.50546	0.000999001	0.0103478	Gardiquimod
GO:0002698	negative regulation of immune effector process	76	0.570747	1.49836	0.000999001	0.0103478	Gardiquimod
GO:0002699	positive regulation of immune effector process	132	0.561104	1.52358	0.000999001	0.0103478	Gardiquimod
GO:0002700	regulation of production of molecular mediator of immune response	85	0.574001	1.51288	0.000999001	0.0103478	Gardiquimod
GO:0002703	regulation of leukocyte mediated immunity	121	0.521853	1.40718	0.000999001	0.0103478	Gardiquimod
GO:0002706	regulation of lymphocyte mediated immunity	86	0.546237	1.44208	0.000999001	0.0103478	Gardiquimod
GO:0002720	positive regulation of cytokine production involved in immune response	35	0.655847	1.64451	0.000999001	0.0103478	Gardiquimod
GO:0002753	cytoplasmic pattern recognition receptor signaling pathway	55	0.586598	1.51954	0.000999001	0.0103478	Gardiquimod
GO:0002757	immune response-activating signal transduction	361	0.459078	1.28796	0.000999001	0.0103478	Gardiquimod
GO:0002761	regulation of myeloid leukocyte differentiation	65	0.55865	1.45516	0.000999001	0.0103478	Gardiquimod
GO:0002764	immune response-regulating signaling pathway	383	0.460687	1.29387	0.000999001	0.0103478	Gardiquimod
GO:0002790	peptide secretion	304	0.459754	1.28075	0.000999001	0.0103478	Gardiquimod
GO:0002791	regulation of peptide secretion	238	0.475036	1.31438	0.000999001	0.0103478	Gardiquimod
GO:0002792	negative regulation of peptide secretion	65	0.642081	1.67248	0.000999001	0.0103478	Gardiquimod
GO:0002793	positive regulation of peptide secretion	134	0.501258	1.36099	0.000999001	0.0103478	Gardiquimod
GO:0002819	regulation of adaptive immune response	104	0.586351	1.5648	0.000999001	0.0103478	Gardiquimod
GO:0002821	positive regulation of adaptive immune response	68	0.568636	1.48293	0.000999001	0.0103478	Gardiquimod
GO:0002822	regulation of adaptive immune response based on somatic recombination of immune receptors built from immunoglobulin superfamily domains	91	0.612008	1.62017	0.000999001	0.0103478	Gardiquimod
GO:0002824	positive regulation of adaptive immune response based on somatic recombination of immune receptors built from immunoglobulin superfamily domains	63	0.588331	1.53121	0.000999001	0.0103478	Gardiquimod
GO:0002831	regulation of response to biotic stimulus	100	0.563748	1.50005	0.000999001	0.0103478	Gardiquimod
GO:0006935	chemotaxis	252	0.47551	1.31857	0.000999001	0.0103478	Gardiquimod
GO:0006954	inflammatory response	334	0.552722	1.54645	0.000999001	0.0103478	Gardiquimod
GO:0006959	humoral immune response	71	0.614161	1.60549	0.000999001	0.0103478	Gardiquimod
GO:0007159	leukocyte cell-cell adhesion	208	0.592968	1.63257	0.000999001	0.0103478	Gardiquimod
GO:0007162	negative regulation of cell adhesion	150	0.548962	1.49597	0.000999001	0.0103478	Gardiquimod
GO:0007186	G protein-coupled receptor signaling pathway	260	0.453003	1.25769	0.000999001	0.0103478	Gardiquimod
GO:0007249	I-kappaB kinase/NF-kappaB signaling	194	0.530169	1.45613	0.000999001	0.0103478	Gardiquimod
GO:0007259	JAK-STAT cascade	75	0.637928	1.67283	0.000999001	0.0103478	Gardiquimod
GO:0008285	negative regulation of cell proliferation	358	0.469877	1.31809	0.000999001	0.0103478	Gardiquimod
GO:0008625	extrinsic apoptotic signaling pathway via death domain receptors	61	0.593436	1.54026	0.000999001	0.0103478	Gardiquimod
GO:0008630	intrinsic apoptotic signaling pathway in response to DNA damage	91	0.522824	1.38407	0.000999001	0.0103478	Gardiquimod
GO:0009306	protein secretion	293	0.465152	1.29489	0.000999001	0.0103478	Gardiquimod
GO:0009615	response to virus	239	0.615944	1.70448	0.000999001	0.0103478	Gardiquimod
GO:0009617	response to bacterium	281	0.544725	1.51521	0.000999001	0.0103478	Gardiquimod
GO:0009636	response to toxic substance	281	0.444633	1.2368	0.000999001	0.0103478	Gardiquimod
GO:0010942	positive regulation of cell death	460	0.43637	1.22942	0.000999001	0.0103478	Gardiquimod
GO:0010950	positive regulation of endopeptidase activity	117	0.510603	1.37413	0.000999001	0.0103478	Gardiquimod
GO:0010952	positive regulation of peptidase activity	130	0.50457	1.36926	0.000999001	0.0103478	Gardiquimod
GO:0014070	response to organic cyclic compound	487	0.431758	1.21803	0.000999001	0.0103478	Gardiquimod
GO:0018212	peptidyl-tyrosine modification	179	0.476776	1.30606	0.000999001	0.0103478	Gardiquimod
GO:0019058	viral life cycle	243	0.462279	1.28008	0.000999001	0.0103478	Gardiquimod
GO:0019079	viral genome replication	97	0.64469	1.71341	0.000999001	0.0103478	Gardiquimod
GO:0019221	cytokine-mediated signaling pathway	478	0.54318	1.53136	0.000999001	0.0103478	Gardiquimod
GO:0022407	regulation of cell-cell adhesion	234	0.595169	1.64634	0.000999001	0.0103478	Gardiquimod
GO:0022408	negative regulation of cell-cell adhesion	102	0.586562	1.56286	0.000999001	0.0103478	Gardiquimod
GO:0022409	positive regulation of cell-cell adhesion	157	0.62664	1.70957	0.000999001	0.0103478	Gardiquimod
GO:0030098	lymphocyte differentiation	220	0.574071	1.58424	0.000999001	0.0103478	Gardiquimod
GO:0030155	regulation of cell adhesion	373	0.532871	1.49577	0.000999001	0.0103478	Gardiquimod
GO:0030217	T cell differentiation	153	0.650086	1.77165	0.000999001	0.0103478	Gardiquimod
GO:0030334	regulation of cell migration	437	0.440224	1.23892	0.000999001	0.0103478	Gardiquimod
GO:0030335	positive regulation of cell migration	268	0.472136	1.3116	0.000999001	0.0103478	Gardiquimod
GO:0030593	neutrophil chemotaxis	36	0.698289	1.7539	0.000999001	0.0103478	Gardiquimod
GO:0030595	leukocyte chemotaxis	93	0.594189	1.57543	0.000999001	0.0103478	Gardiquimod
GO:0031098	stress-activated protein kinase signaling cascade	200	0.477947	1.31423	0.000999001	0.0103478	Gardiquimod
GO:0031347	regulation of defense response	456	0.492647	1.3877	0.000999001	0.0103478	Gardiquimod
GO:0031348	negative regulation of defense response	117	0.528878	1.42332	0.000999001	0.0103478	Gardiquimod
GO:0031349	positive regulation of defense response	301	0.498834	1.38982	0.000999001	0.0103478	Gardiquimod
GO:0032101	regulation of response to external stimulus	382	0.519782	1.45965	0.000999001	0.0103478	Gardiquimod
GO:0032102	negative regulation of response to external stimulus	149	0.520698	1.41792	0.000999001	0.0103478	Gardiquimod
GO:0032103	positive regulation of response to external stimulus	140	0.571863	1.55423	0.000999001	0.0103478	Gardiquimod
GO:0032479	regulation of type I interferon production	110	0.612275	1.64014	0.000999001	0.0103478	Gardiquimod
GO:0032481	positive regulation of type I interferon production	67	0.599246	1.56116	0.000999001	0.0103478	Gardiquimod
GO:0032496	response to lipopolysaccharide	173	0.571116	1.56329	0.000999001	0.0103478	Gardiquimod
GO:0032606	type I interferon production	112	0.598634	1.60709	0.000999001	0.0103478	Gardiquimod
GO:0032609	interferon-gamma production	56	0.69919	1.81173	0.000999001	0.0103478	Gardiquimod
GO:0032615	interleukin-12 production	35	0.722599	1.81189	0.000999001	0.0103478	Gardiquimod
GO:0032635	interleukin-6 production	77	0.655335	1.72195	0.000999001	0.0103478	Gardiquimod
GO:0032640	tumor necrosis factor production	88	0.605344	1.59998	0.000999001	0.0103478	Gardiquimod
GO:0032642	regulation of chemokine production	36	0.695365	1.74656	0.000999001	0.0103478	Gardiquimod
GO:0032675	regulation of interleukin-6 production	72	0.672855	1.75928	0.000999001	0.0103478	Gardiquimod
GO:0032677	regulation of interleukin-8 production	35	0.704661	1.76691	0.000999001	0.0103478	Gardiquimod
GO:0032680	regulation of tumor necrosis factor production	85	0.611443	1.61156	0.000999001	0.0103478	Gardiquimod
GO:0032872	regulation of stress-activated MAPK cascade	142	0.519358	1.41151	0.000999001	0.0103478	Gardiquimod
GO:0032874	positive regulation of stress-activated MAPK cascade	96	0.533425	1.4168	0.000999001	0.0103478	Gardiquimod
GO:0032943	mononuclear cell proliferation	159	0.486418	1.32736	0.000999001	0.0103478	Gardiquimod
GO:0032944	regulation of mononuclear cell proliferation	121	0.535364	1.44361	0.000999001	0.0103478	Gardiquimod
GO:0033002	muscle cell proliferation	96	0.526765	1.39911	0.000999001	0.0103478	Gardiquimod
GO:0033993	response to lipid	480	0.456614	1.28762	0.000999001	0.0103478	Gardiquimod
GO:0034340	response to type I interferon	74	0.672022	1.76117	0.000999001	0.0103478	Gardiquimod
GO:0034341	response to interferon-gamma	130	0.578477	1.56982	0.000999001	0.0103478	Gardiquimod
GO:0034612	response to tumor necrosis factor	194	0.523669	1.43828	0.000999001	0.0103478	Gardiquimod
GO:0035239	tube morphogenesis	386	0.459365	1.29019	0.000999001	0.0103478	Gardiquimod
GO:0035295	tube development	470	0.446681	1.25936	0.000999001	0.0103478	Gardiquimod
GO:0035710	CD4-positive, alpha-beta T cell activation	61	0.730364	1.89565	0.000999001	0.0103478	Gardiquimod
GO:0038061	NIK/NF-kappaB signaling	120	0.605527	1.63185	0.000999001	0.0103478	Gardiquimod
GO:0040017	positive regulation of locomotion	286	0.455063	1.26586	0.000999001	0.0103478	Gardiquimod
GO:0042035	regulation of cytokine biosynthetic process	57	0.590278	1.52972	0.000999001	0.0103478	Gardiquimod
GO:0042089	cytokine biosynthetic process	61	0.601475	1.56112	0.000999001	0.0103478	Gardiquimod
GO:0042107	cytokine metabolic process	61	0.601475	1.56112	0.000999001	0.0103478	Gardiquimod
GO:0042110	T cell activation	287	0.572644	1.59292	0.000999001	0.0103478	Gardiquimod
GO:0042133	neurotransmitter metabolic process	69	0.583635	1.52322	0.000999001	0.0103478	Gardiquimod
GO:0042330	taxis	254	0.476572	1.32142	0.000999001	0.0103478	Gardiquimod
GO:0042509	regulation of tyrosine phosphorylation of STAT protein	36	0.709118	1.7811	0.000999001	0.0103478	Gardiquimod
GO:0042742	defense response to bacterium	78	0.627733	1.64981	0.000999001	0.0103478	Gardiquimod
GO:0043065	positive regulation of apoptotic process	431	0.442079	1.24386	0.000999001	0.0103478	Gardiquimod
GO:0043066	negative regulation of apoptotic process	500	0.469943	1.32586	0.000999001	0.0103478	Gardiquimod
GO:0043068	positive regulation of programmed cell death	435	0.437223	1.23043	0.000999001	0.0103478	Gardiquimod
GO:0043087	regulation of GTPase activity	291	0.441244	1.22819	0.000999001	0.0103478	Gardiquimod
GO:0043122	regulation of I-kappaB kinase/NF-kappaB signaling	168	0.532411	1.45477	0.000999001	0.0103478	Gardiquimod
GO:0043124	negative regulation of I-kappaB kinase/NF-kappaB signaling	35	0.677759	1.69945	0.000999001	0.0103478	Gardiquimod
GO:0043367	CD4-positive, alpha-beta T cell differentiation	52	0.747238	1.93189	0.000999001	0.0103478	Gardiquimod
GO:0043408	regulation of MAPK cascade	380	0.49282	1.38396	0.000999001	0.0103478	Gardiquimod
GO:0043410	positive regulation of MAPK cascade	259	0.524772	1.45653	0.000999001	0.0103478	Gardiquimod
GO:0043900	regulation of multi-organism process	279	0.543507	1.51169	0.000999001	0.0103478	Gardiquimod
GO:0043901	negative regulation of multi-organism process	115	0.622841	1.67531	0.000999001	0.0103478	Gardiquimod
GO:0043903	regulation of symbiosis, encompassing mutualism through parasitism	171	0.56826	1.55389	0.000999001	0.0103478	Gardiquimod
GO:0045069	regulation of viral genome replication	77	0.688131	1.80812	0.000999001	0.0103478	Gardiquimod
GO:0045088	regulation of innate immune response	297	0.464742	1.29447	0.000999001	0.0103478	Gardiquimod
GO:0045089	positive regulation of innate immune response	250	0.461584	1.27986	0.000999001	0.0103478	Gardiquimod
GO:0045580	regulation of T cell differentiation	95	0.684442	1.81628	0.000999001	0.0103478	Gardiquimod
GO:0045582	positive regulation of T cell differentiation	56	0.711231	1.84293	0.000999001	0.0103478	Gardiquimod
GO:0045596	negative regulation of cell differentiation	332	0.4659	1.30327	0.000999001	0.0103478	Gardiquimod
GO:0045597	positive regulation of cell differentiation	480	0.435378	1.22774	0.000999001	0.0103478	Gardiquimod
GO:0045619	regulation of lymphocyte differentiation	109	0.650708	1.74246	0.000999001	0.0103478	Gardiquimod
GO:0045621	positive regulation of lymphocyte differentiation	63	0.693905	1.80598	0.000999001	0.0103478	Gardiquimod
GO:0045785	positive regulation of cell adhesion	228	0.579428	1.6028	0.000999001	0.0103478	Gardiquimod
GO:0045862	positive regulation of proteolysis	242	0.460991	1.27635	0.000999001	0.0103478	Gardiquimod
GO:0046328	regulation of JNK cascade	112	0.536734	1.44092	0.000999001	0.0103478	Gardiquimod
GO:0046425	regulation of JAK-STAT cascade	61	0.682073	1.77031	0.000999001	0.0103478	Gardiquimod
GO:0046631	alpha-beta T cell activation	90	0.682861	1.80786	0.000999001	0.0103478	Gardiquimod
GO:0046632	alpha-beta T cell differentiation	67	0.729882	1.9015	0.000999001	0.0103478	Gardiquimod
GO:0046634	regulation of alpha-beta T cell activation	61	0.70069	1.81863	0.000999001	0.0103478	Gardiquimod
GO:0046649	lymphocyte activation	423	0.492102	1.38394	0.000999001	0.0103478	Gardiquimod
GO:0048015	phosphatidylinositol-mediated signaling	97	0.509885	1.35514	0.000999001	0.0103478	Gardiquimod
GO:0048017	inositol lipid-mediated signaling	99	0.514469	1.3685	0.000999001	0.0103478	Gardiquimod
GO:0048525	negative regulation of viral process	73	0.694201	1.81656	0.000999001	0.0103478	Gardiquimod
GO:0048568	embryonic organ development	182	0.483588	1.32593	0.000999001	0.0103478	Gardiquimod
GO:0048646	anatomical structure formation involved in morphogenesis	472	0.443237	1.24947	0.000999001	0.0103478	Gardiquimod
GO:0050663	cytokine secretion	116	0.56982	1.53305	0.000999001	0.0103478	Gardiquimod
GO:0050670	regulation of lymphocyte proliferation	120	0.532512	1.43508	0.000999001	0.0103478	Gardiquimod
GO:0050688	regulation of defense response to virus	62	0.623189	1.6206	0.000999001	0.0103478	Gardiquimod
GO:0050707	regulation of cytokine secretion	98	0.58214	1.54797	0.000999001	0.0103478	Gardiquimod
GO:0050708	regulation of protein secretion	228	0.485008	1.34161	0.000999001	0.0103478	Gardiquimod
GO:0050709	negative regulation of protein secretion	64	0.644337	1.67731	0.000999001	0.0103478	Gardiquimod
GO:0050714	positive regulation of protein secretion	127	0.516828	1.39941	0.000999001	0.0103478	Gardiquimod
GO:0050715	positive regulation of cytokine secretion	63	0.597902	1.55612	0.000999001	0.0103478	Gardiquimod
GO:0050727	regulation of inflammatory response	175	0.563388	1.54264	0.000999001	0.0103478	Gardiquimod
GO:0050728	negative regulation of inflammatory response	68	0.573859	1.49655	0.000999001	0.0103478	Gardiquimod
GO:0050729	positive regulation of inflammatory response	61	0.697554	1.81049	0.000999001	0.0103478	Gardiquimod
GO:0050731	positive regulation of peptidyl-tyrosine phosphorylation	78	0.559454	1.47036	0.000999001	0.0103478	Gardiquimod
GO:0050777	negative regulation of immune response	86	0.561514	1.48241	0.000999001	0.0103478	Gardiquimod
GO:0050778	positive regulation of immune response	491	0.455573	1.28556	0.000999001	0.0103478	Gardiquimod
GO:0050792	regulation of viral process	163	0.571775	1.56083	0.000999001	0.0103478	Gardiquimod
GO:0050863	regulation of T cell activation	201	0.590179	1.62361	0.000999001	0.0103478	Gardiquimod
GO:0050865	regulation of cell activation	318	0.527801	1.4736	0.000999001	0.0103478	Gardiquimod
GO:0050866	negative regulation of cell activation	110	0.538315	1.44202	0.000999001	0.0103478	Gardiquimod
GO:0050867	positive regulation of cell activation	195	0.558165	1.53348	0.000999001	0.0103478	Gardiquimod
GO:0050868	negative regulation of T cell activation	69	0.594538	1.55168	0.000999001	0.0103478	Gardiquimod
GO:0050870	positive regulation of T cell activation	132	0.596404	1.61943	0.000999001	0.0103478	Gardiquimod
GO:0050900	leukocyte migration	206	0.524007	1.44219	0.000999001	0.0103478	Gardiquimod
GO:0051047	positive regulation of secretion	195	0.464147	1.27518	0.000999001	0.0103478	Gardiquimod
GO:0051048	negative regulation of secretion	99	0.57973	1.5421	0.000999001	0.0103478	Gardiquimod
GO:0051090	regulation of DNA-binding transcription factor activity	273	0.480486	1.3352	0.000999001	0.0103478	Gardiquimod
GO:0051091	positive regulation of DNA-binding transcription factor activity	168	0.488187	1.33393	0.000999001	0.0103478	Gardiquimod
GO:0051093	negative regulation of developmental process	440	0.475772	1.33928	0.000999001	0.0103478	Gardiquimod
GO:0051222	positive regulation of protein transport	243	0.458864	1.27062	0.000999001	0.0103478	Gardiquimod
GO:0051224	negative regulation of protein transport	101	0.558838	1.48787	0.000999001	0.0103478	Gardiquimod
GO:0051249	regulation of lymphocyte activation	267	0.540939	1.5028	0.000999001	0.0103478	Gardiquimod
GO:0051250	negative regulation of lymphocyte activation	90	0.56441	1.49426	0.000999001	0.0103478	Gardiquimod
GO:0051251	positive regulation of lymphocyte activation	174	0.558839	1.53014	0.000999001	0.0103478	Gardiquimod
GO:0051270	regulation of cellular component movement	499	0.424682	1.19808	0.000999001	0.0103478	Gardiquimod
GO:0051272	positive regulation of cellular component movement	277	0.468836	1.30396	0.000999001	0.0103478	Gardiquimod
GO:0051345	positive regulation of hydrolase activity	475	0.445526	1.25588	0.000999001	0.0103478	Gardiquimod
GO:0051384	response to glucocorticoid	64	0.594785	1.54832	0.000999001	0.0103478	Gardiquimod
GO:0051403	stress-activated MAPK cascade	180	0.488082	1.33735	0.000999001	0.0103478	Gardiquimod
GO:0051607	defense response to virus	176	0.636951	1.74433	0.000999001	0.0103478	Gardiquimod
GO:0060326	cell chemotaxis	121	0.55686	1.50157	0.000999001	0.0103478	Gardiquimod
GO:0060333	interferon-gamma-mediated signaling pathway	71	0.608545	1.59081	0.000999001	0.0103478	Gardiquimod
GO:0060337	type I interferon signaling pathway	70	0.686082	1.79094	0.000999001	0.0103478	Gardiquimod
GO:0060759	regulation of response to cytokine stimulus	123	0.538114	1.45208	0.000999001	0.0103478	Gardiquimod
GO:0070302	regulation of stress-activated protein kinase signaling cascade	144	0.520062	1.41459	0.000999001	0.0103478	Gardiquimod
GO:0070304	positive regulation of stress-activated protein kinase signaling cascade	97	0.536284	1.4253	0.000999001	0.0103478	Gardiquimod
GO:0070371	ERK1 and ERK2 cascade	145	0.582669	1.58497	0.000999001	0.0103478	Gardiquimod
GO:0070372	regulation of ERK1 and ERK2 cascade	133	0.588784	1.59886	0.000999001	0.0103478	Gardiquimod
GO:0070374	positive regulation of ERK1 and ERK2 cascade	90	0.621663	1.64584	0.000999001	0.0103478	Gardiquimod
GO:0070555	response to interleukin-1	135	0.529356	1.43774	0.000999001	0.0103478	Gardiquimod
GO:0070663	regulation of leukocyte proliferation	124	0.533642	1.44139	0.000999001	0.0103478	Gardiquimod
GO:0070997	neuron death	206	0.474033	1.30465	0.000999001	0.0103478	Gardiquimod
GO:0071216	cellular response to biotic stimulus	139	0.551574	1.4989	0.000999001	0.0103478	Gardiquimod
GO:0071219	cellular response to molecule of bacterial origin	117	0.581127	1.56393	0.000999001	0.0103478	Gardiquimod
GO:0071222	cellular response to lipopolysaccharide	112	0.583767	1.56718	0.000999001	0.0103478	Gardiquimod
GO:0071229	cellular response to acid chemical	103	0.528762	1.40982	0.000999001	0.0103478	Gardiquimod
GO:0071346	cellular response to interferon-gamma	119	0.592677	1.59737	0.000999001	0.0103478	Gardiquimod
GO:0071347	cellular response to interleukin-1	119	0.570878	1.53862	0.000999001	0.0103478	Gardiquimod
GO:0071356	cellular response to tumor necrosis factor	182	0.546608	1.49873	0.000999001	0.0103478	Gardiquimod
GO:0071357	cellular response to type I interferon	70	0.686082	1.79094	0.000999001	0.0103478	Gardiquimod
GO:0071396	cellular response to lipid	332	0.457559	1.27994	0.000999001	0.0103478	Gardiquimod
GO:0071706	tumor necrosis factor superfamily cytokine production	92	0.611903	1.62137	0.000999001	0.0103478	Gardiquimod
GO:0071887	leukocyte apoptotic process	66	0.629815	1.64129	0.000999001	0.0103478	Gardiquimod
GO:0072006	nephron development	55	0.554356	1.43602	0.000999001	0.0103478	Gardiquimod
GO:0072358	cardiovascular system development	327	0.435989	1.21888	0.000999001	0.0103478	Gardiquimod
GO:0072676	lymphocyte migration	54	0.692824	1.79482	0.000999001	0.0103478	Gardiquimod
GO:0097191	extrinsic apoptotic signaling pathway	148	0.515211	1.40284	0.000999001	0.0103478	Gardiquimod
GO:0097529	myeloid leukocyte migration	85	0.556224	1.46602	0.000999001	0.0103478	Gardiquimod
GO:0097530	granulocyte migration	53	0.628064	1.62571	0.000999001	0.0103478	Gardiquimod
GO:0097696	STAT cascade	76	0.629165	1.65172	0.000999001	0.0103478	Gardiquimod
GO:0098542	defense response to other organism	260	0.621282	1.72489	0.000999001	0.0103478	Gardiquimod
GO:0098609	cell-cell adhesion	352	0.532882	1.49435	0.000999001	0.0103478	Gardiquimod
GO:1901214	regulation of neuron death	184	0.501882	1.3762	0.000999001	0.0103478	Gardiquimod
GO:1901222	regulation of NIK/NF-kappaB signaling	65	0.662973	1.72689	0.000999001	0.0103478	Gardiquimod
GO:1902105	regulation of leukocyte differentiation	166	0.61901	1.69136	0.000999001	0.0103478	Gardiquimod
GO:1902106	negative regulation of leukocyte differentiation	57	0.613651	1.59029	0.000999001	0.0103478	Gardiquimod
GO:1902107	positive regulation of leukocyte differentiation	94	0.63702	1.68953	0.000999001	0.0103478	Gardiquimod
GO:1903037	regulation of leukocyte cell-cell adhesion	191	0.606605	1.66606	0.000999001	0.0103478	Gardiquimod
GO:1903038	negative regulation of leukocyte cell-cell adhesion	74	0.595468	1.56055	0.000999001	0.0103478	Gardiquimod
GO:1903039	positive regulation of leukocyte cell-cell adhesion	144	0.619645	1.68546	0.000999001	0.0103478	Gardiquimod
GO:1903409	reactive oxygen species biosynthetic process	57	0.626982	1.62484	0.000999001	0.0103478	Gardiquimod
GO:1903530	regulation of secretion by cell	347	0.439963	1.2328	0.000999001	0.0103478	Gardiquimod
GO:1903531	negative regulation of secretion by cell	93	0.584878	1.55074	0.000999001	0.0103478	Gardiquimod
GO:1903532	positive regulation of secretion by cell	186	0.471069	1.29209	0.000999001	0.0103478	Gardiquimod
GO:1903555	regulation of tumor necrosis factor superfamily cytokine production	88	0.620924	1.64116	0.000999001	0.0103478	Gardiquimod
GO:1903706	regulation of hemopoiesis	308	0.518569	1.44591	0.000999001	0.0103478	Gardiquimod
GO:1903707	negative regulation of hemopoiesis	84	0.554415	1.46069	0.000999001	0.0103478	Gardiquimod
GO:1903708	positive regulation of hemopoiesis	119	0.61961	1.66996	0.000999001	0.0103478	Gardiquimod
GO:1903725	regulation of phospholipid metabolic process	54	0.560385	1.45173	0.000999001	0.0103478	Gardiquimod
GO:1903900	regulation of viral life cycle	111	0.599702	1.60838	0.000999001	0.0103478	Gardiquimod
GO:1903901	negative regulation of viral life cycle	61	0.696146	1.80684	0.000999001	0.0103478	Gardiquimod
GO:1904019	epithelial cell apoptotic process	55	0.594794	1.54078	0.000999001	0.0103478	Gardiquimod
GO:1904892	regulation of STAT cascade	62	0.672119	1.74785	0.000999001	0.0103478	Gardiquimod
GO:1904950	negative regulation of establishment of protein localization	103	0.550286	1.46721	0.000999001	0.0103478	Gardiquimod
GO:1904951	positive regulation of establishment of protein localization	279	0.442251	1.23006	0.000999001	0.0103478	Gardiquimod
GO:1905952	regulation of lipid localization	64	0.561268	1.46107	0.000999001	0.0103478	Gardiquimod
GO:2000145	regulation of cell motility	463	0.441685	1.24467	0.000999001	0.0103478	Gardiquimod
GO:2000147	positive regulation of cell motility	270	0.474066	1.3173	0.000999001	0.0103478	Gardiquimod
GO:2000401	regulation of lymphocyte migration	36	0.646611	1.6241	0.000999001	0.0103478	Gardiquimod
GO:2001236	regulation of extrinsic apoptotic signaling pathway	98	0.575192	1.52949	0.000999001	0.0103478	Gardiquimod
GO:2001237	negative regulation of extrinsic apoptotic signaling pathway	61	0.576796	1.49707	0.000999001	0.0103478	Gardiquimod
GO:0002287	alpha-beta T cell activation involved in immune response	42	0.719338	1.8321	0.001	0.0103478	Gardiquimod
GO:0002292	T cell differentiation involved in immune response	45	0.688329	1.76112	0.001	0.0103478	Gardiquimod
GO:0002293	alpha-beta T cell differentiation involved in immune response	42	0.719338	1.8321	0.001	0.0103478	Gardiquimod
GO:0002294	CD4-positive, alpha-beta T cell differentiation involved in immune response	42	0.719338	1.8321	0.001	0.0103478	Gardiquimod
GO:0002526	acute inflammatory response	49	0.591301	1.52218	0.001	0.0103478	Gardiquimod
GO:0002690	positive regulation of leukocyte chemotaxis	43	0.621593	1.58642	0.001	0.0103478	Gardiquimod
GO:0002718	regulation of cytokine production involved in immune response	50	0.681842	1.75726	0.001	0.0103478	Gardiquimod
GO:0006809	nitric oxide biosynthetic process	38	0.716571	1.81018	0.001	0.0103478	Gardiquimod
GO:0007260	tyrosine phosphorylation of STAT protein	38	0.703158	1.7763	0.001	0.0103478	Gardiquimod
GO:0032480	negative regulation of type I interferon production	42	0.687328	1.75057	0.001	0.0103478	Gardiquimod
GO:0032602	chemokine production	39	0.695718	1.76161	0.001	0.0103478	Gardiquimod
GO:0032608	interferon-beta production	44	0.623279	1.59217	0.001	0.0103478	Gardiquimod
GO:0032611	interleukin-1 beta production	46	0.623126	1.59628	0.001	0.0103478	Gardiquimod
GO:0032612	interleukin-1 production	51	0.619887	1.59978	0.001	0.0103478	Gardiquimod
GO:0032637	interleukin-8 production	37	0.706307	1.78079	0.001	0.0103478	Gardiquimod
GO:0032648	regulation of interferon-beta production	42	0.637081	1.62259	0.001	0.0103478	Gardiquimod
GO:0032649	regulation of interferon-gamma production	50	0.740547	1.90856	0.001	0.0103478	Gardiquimod
GO:0032651	regulation of interleukin-1 beta production	42	0.636855	1.62202	0.001	0.0103478	Gardiquimod
GO:0032652	regulation of interleukin-1 production	46	0.635968	1.62918	0.001	0.0103478	Gardiquimod
GO:0032655	regulation of interleukin-12 production	34	0.738569	1.85053	0.001	0.0103478	Gardiquimod
GO:0032720	negative regulation of tumor necrosis factor production	33	0.681318	1.69989	0.001	0.0103478	Gardiquimod
GO:0032729	positive regulation of interferon-gamma production	34	0.649109	1.62638	0.001	0.0103478	Gardiquimod
GO:0032755	positive regulation of interleukin-6 production	44	0.679507	1.73581	0.001	0.0103478	Gardiquimod
GO:0033077	T cell differentiation in thymus	42	0.662011	1.68609	0.001	0.0103478	Gardiquimod
GO:0038034	signal transduction in absence of ligand	43	0.64227	1.63919	0.001	0.0103478	Gardiquimod
GO:0042093	T-helper cell differentiation	41	0.718488	1.82673	0.001	0.0103478	Gardiquimod
GO:0042116	macrophage activation	47	0.649974	1.66575	0.001	0.0103478	Gardiquimod
GO:0042136	neurotransmitter biosynthetic process	46	0.700825	1.79533	0.001	0.0103478	Gardiquimod
GO:0043331	response to dsRNA	33	0.659924	1.64651	0.001	0.0103478	Gardiquimod
GO:0043370	regulation of CD4-positive, alpha-beta T cell differentiation	33	0.767966	1.91607	0.001	0.0103478	Gardiquimod
GO:0043550	regulation of lipid kinase activity	41	0.606752	1.54264	0.001	0.0103478	Gardiquimod
GO:0043551	regulation of phosphatidylinositol 3-kinase activity	34	0.647928	1.62343	0.001	0.0103478	Gardiquimod
GO:0044764	multi-organism cellular process	32	0.639911	1.59284	0.001	0.0103478	Gardiquimod
GO:0045071	negative regulation of viral genome replication	46	0.76549	1.96098	0.001	0.0103478	Gardiquimod
GO:0045123	cellular extravasation	33	0.649789	1.62122	0.001	0.0103478	Gardiquimod
GO:0045428	regulation of nitric oxide biosynthetic process	33	0.744642	1.85788	0.001	0.0103478	Gardiquimod
GO:0045620	negative regulation of lymphocyte differentiation	32	0.670038	1.66783	0.001	0.0103478	Gardiquimod
GO:0046209	nitric oxide metabolic process	41	0.698036	1.77473	0.001	0.0103478	Gardiquimod
GO:0046427	positive regulation of JAK-STAT cascade	38	0.716881	1.81097	0.001	0.0103478	Gardiquimod
GO:0046635	positive regulation of alpha-beta T cell activation	40	0.67931	1.72361	0.001	0.0103478	Gardiquimod
GO:0046637	regulation of alpha-beta T cell differentiation	42	0.7542	1.92089	0.001	0.0103478	Gardiquimod
GO:0048661	positive regulation of smooth muscle cell proliferation	49	0.584123	1.5037	0.001	0.0103478	Gardiquimod
GO:0050710	negative regulation of cytokine secretion	33	0.699224	1.74456	0.001	0.0103478	Gardiquimod
GO:0050830	defense response to Gram-positive bacterium	34	0.660279	1.65437	0.001	0.0103478	Gardiquimod
GO:0060760	positive regulation of response to cytokine stimulus	40	0.650473	1.65044	0.001	0.0103478	Gardiquimod
GO:0070227	lymphocyte apoptotic process	45	0.659751	1.688	0.001	0.0103478	Gardiquimod
GO:0070228	regulation of lymphocyte apoptotic process	33	0.726817	1.81341	0.001	0.0103478	Gardiquimod
GO:0070664	negative regulation of leukocyte proliferation	43	0.594106	1.51627	0.001	0.0103478	Gardiquimod
GO:0071621	granulocyte chemotaxis	44	0.638499	1.63105	0.001	0.0103478	Gardiquimod
GO:0071674	mononuclear cell migration	38	0.676952	1.7101	0.001	0.0103478	Gardiquimod
GO:0072678	T cell migration	37	0.646192	1.62922	0.001	0.0103478	Gardiquimod
GO:0097192	extrinsic apoptotic signaling pathway in absence of ligand	43	0.64227	1.63919	0.001	0.0103478	Gardiquimod
GO:0097194	execution phase of apoptosis	51	0.572879	1.47846	0.001	0.0103478	Gardiquimod
GO:0098586	cellular response to virus	44	0.699122	1.78591	0.001	0.0103478	Gardiquimod
GO:1901224	positive regulation of NIK/NF-kappaB signaling	46	0.651065	1.66786	0.001	0.0103478	Gardiquimod
GO:1902041	regulation of extrinsic apoptotic signaling pathway via death domain receptors	38	0.631447	1.59515	0.001	0.0103478	Gardiquimod
GO:1903426	regulation of reactive oxygen species biosynthetic process	48	0.660877	1.69723	0.001	0.0103478	Gardiquimod
GO:1903556	negative regulation of tumor necrosis factor superfamily cytokine production	34	0.688983	1.72629	0.001	0.0103478	Gardiquimod
GO:1903557	positive regulation of tumor necrosis factor superfamily cytokine production	51	0.565996	1.4607	0.001	0.0103478	Gardiquimod
GO:1904894	positive regulation of STAT cascade	39	0.702887	1.77977	0.001	0.0103478	Gardiquimod
GO:1990266	neutrophil migration	44	0.679268	1.7352	0.001	0.0103478	Gardiquimod
GO:1990868	response to chemokine	32	0.762184	1.89719	0.001	0.0103478	Gardiquimod
GO:1990869	cellular response to chemokine	32	0.762184	1.89719	0.001	0.0103478	Gardiquimod
GO:2000106	regulation of leukocyte apoptotic process	51	0.69522	1.79419	0.001	0.0103478	Gardiquimod
GO:2000514	regulation of CD4-positive, alpha-beta T cell activation	39	0.745672	1.8881	0.001	0.0103478	Gardiquimod
GO:2001057	reactive nitrogen species metabolic process	43	0.683068	1.74332	0.001	0.0103478	Gardiquimod
GO:0046638	positive regulation of alpha-beta T cell differentiation	30	0.734669	1.81793	0.001001	0.0103478	Gardiquimod
GO:0050691	regulation of defense response to virus by host	30	0.700974	1.73455	0.001001	0.0103478	Gardiquimod
GO:0070231	T cell apoptotic process	30	0.715885	1.77145	0.001001	0.0103478	Gardiquimod
GO:0002437	inflammatory response to antigenic stimulus	27	0.785815	1.92558	0.001002	0.0103478	Gardiquimod
GO:0002823	negative regulation of adaptive immune response based on somatic recombination of immune receptors built from immunoglobulin superfamily domains	23	0.687389	1.65537	0.001002	0.0103478	Gardiquimod
GO:0006509	membrane protein ectodomain proteolysis	25	0.700663	1.70359	0.001002	0.0103478	Gardiquimod
GO:0010883	regulation of lipid storage	25	0.69023	1.67822	0.001002	0.0103478	Gardiquimod
GO:0032613	interleukin-10 production	26	0.728438	1.77524	0.001002	0.0103478	Gardiquimod
GO:0032715	negative regulation of interleukin-6 production	25	0.746743	1.81563	0.001002	0.0103478	Gardiquimod
GO:0032722	positive regulation of chemokine production	27	0.675523	1.65532	0.001002	0.0103478	Gardiquimod
GO:0032757	positive regulation of interleukin-8 production	23	0.724819	1.74551	0.001002	0.0103478	Gardiquimod
GO:0042531	positive regulation of tyrosine phosphorylation of STAT protein	26	0.725744	1.76868	0.001002	0.0103478	Gardiquimod
GO:0043030	regulation of macrophage activation	26	0.659783	1.60793	0.001002	0.0103478	Gardiquimod
GO:0045581	negative regulation of T cell differentiation	29	0.7039	1.73654	0.001002	0.0103478	Gardiquimod
GO:0046636	negative regulation of alpha-beta T cell activation	25	0.746014	1.81386	0.001002	0.0103478	Gardiquimod
GO:0048247	lymphocyte chemotaxis	23	0.769735	1.85368	0.001002	0.0103478	Gardiquimod
GO:0070098	chemokine-mediated signaling pathway	25	0.761098	1.85053	0.001002	0.0103478	Gardiquimod
GO:0072604	interleukin-6 secretion	23	0.746715	1.79825	0.001002	0.0103478	Gardiquimod
GO:0097366	response to bronchodilator	29	0.691423	1.70576	0.001002	0.0103478	Gardiquimod
GO:1901031	regulation of response to reactive oxygen species	23	0.712268	1.71529	0.001002	0.0103478	Gardiquimod
GO:1903428	positive regulation of reactive oxygen species biosynthetic process	27	0.662366	1.62308	0.001002	0.0103478	Gardiquimod
GO:2000108	positive regulation of leukocyte apoptotic process	23	0.708327	1.7058	0.001002	0.0103478	Gardiquimod
GO:2001239	regulation of extrinsic apoptotic signaling pathway in absence of ligand	26	0.660898	1.61064	0.001002	0.0103478	Gardiquimod
GO:0002548	monocyte chemotaxis	24	0.712019	1.72199	0.00100301	0.0103478	Gardiquimod
GO:0019730	antimicrobial humoral response	24	0.681433	1.64802	0.00100301	0.0103478	Gardiquimod
GO:0032653	regulation of interleukin-10 production	24	0.744377	1.80025	0.00100301	0.0103478	Gardiquimod
GO:0039528	cytoplasmic pattern recognition receptor signaling pathway in response to virus	24	0.676624	1.63639	0.00100301	0.0103478	Gardiquimod
GO:0045066	regulatory T cell differentiation	24	0.678964	1.64205	0.00100301	0.0103478	Gardiquimod
GO:0072577	endothelial cell apoptotic process	24	0.725579	1.75479	0.00100301	0.0103478	Gardiquimod
GO:0002230	positive regulation of defense response to virus by host	22	0.740866	1.77448	0.00100402	0.0103478	Gardiquimod
GO:0002701	negative regulation of production of molecular mediator of immune response	20	0.709278	1.68171	0.00100402	0.0103478	Gardiquimod
GO:0032069	regulation of nuclease activity	21	0.762959	1.81907	0.00100402	0.0103478	Gardiquimod
GO:0032607	interferon-alpha production	21	0.712201	1.69805	0.00100402	0.0103478	Gardiquimod
GO:0032647	regulation of interferon-alpha production	20	0.738136	1.75013	0.00100402	0.0103478	Gardiquimod
GO:0032897	negative regulation of viral transcription	20	0.70209	1.66466	0.00100402	0.0103478	Gardiquimod
GO:0035456	response to interferon-beta	20	0.729346	1.72929	0.00100402	0.0103478	Gardiquimod
GO:0045429	positive regulation of nitric oxide biosynthetic process	21	0.703354	1.67696	0.00100402	0.0103478	Gardiquimod
GO:0045622	regulation of T-helper cell differentiation	22	0.76003	1.82038	0.00100402	0.0103478	Gardiquimod
GO:1904707	positive regulation of vascular smooth muscle cell proliferation	22	0.709662	1.69975	0.00100402	0.0103478	Gardiquimod
GO:2000107	negative regulation of leukocyte apoptotic process	22	0.797697	1.9106	0.00100402	0.0103478	Gardiquimod
GO:2000403	positive regulation of lymphocyte migration	20	0.776275	1.84056	0.00100402	0.0103478	Gardiquimod
GO:2000515	negative regulation of CD4-positive, alpha-beta T cell activation	20	0.76624	1.81676	0.00100402	0.0103478	Gardiquimod
GO:2000516	positive regulation of CD4-positive, alpha-beta T cell activation	21	0.735523	1.75365	0.00100402	0.0103478	Gardiquimod
GO:0032495	response to muramyl dipeptide	19	0.720117	1.69839	0.00100705	0.0103478	Gardiquimod
GO:0032633	interleukin-4 production	18	0.769525	1.79743	0.00100705	0.0103478	Gardiquimod
GO:0032733	positive regulation of interleukin-10 production	18	0.761857	1.77952	0.00100705	0.0103478	Gardiquimod
GO:0032735	positive regulation of interleukin-12 production	19	0.780176	1.84004	0.00100705	0.0103478	Gardiquimod
GO:0042092	type 2 immune response	18	0.778555	1.81852	0.00100705	0.0103478	Gardiquimod
GO:0043372	positive regulation of CD4-positive, alpha-beta T cell differentiation	19	0.755662	1.78222	0.00100705	0.0103478	Gardiquimod
GO:0046426	negative regulation of JAK-STAT cascade	18	0.784684	1.83284	0.00100705	0.0103478	Gardiquimod
GO:0050857	positive regulation of antigen receptor-mediated signaling pathway	19	0.723746	1.70695	0.00100705	0.0103478	Gardiquimod
GO:0070232	regulation of T cell apoptotic process	19	0.783236	1.84725	0.00100705	0.0103478	Gardiquimod
GO:0071359	cellular response to dsRNA	19	0.741123	1.74793	0.00100705	0.0103478	Gardiquimod
GO:0072538	T-helper 17 type immune response	18	0.807654	1.88649	0.00100705	0.0103478	Gardiquimod
GO:1903427	negative regulation of reactive oxygen species biosynthetic process	18	0.733064	1.71226	0.00100705	0.0103478	Gardiquimod
GO:1904893	negative regulation of STAT cascade	18	0.784684	1.83284	0.00100705	0.0103478	Gardiquimod
GO:2000351	regulation of endothelial cell apoptotic process	19	0.719341	1.69656	0.00100705	0.0103478	Gardiquimod
GO:0035455	response to interferon-alpha	17	0.754259	1.74438	0.00101112	0.0103478	Gardiquimod
GO:0046639	negative regulation of alpha-beta T cell differentiation	17	0.762628	1.76374	0.00101112	0.0103478	Gardiquimod
GO:0072539	T-helper 17 cell differentiation	17	0.828219	1.91543	0.00101112	0.0103478	Gardiquimod
GO:0002861	regulation of inflammatory response to antigenic stimulus	15	0.857116	1.96344	0.00101317	0.0103478	Gardiquimod
GO:0032673	regulation of interleukin-4 production	15	0.779635	1.78595	0.00101317	0.0103478	Gardiquimod
GO:0033081	regulation of T cell differentiation in thymus	15	0.829312	1.89975	0.00101317	0.0103478	Gardiquimod
GO:0032689	negative regulation of interferon-gamma production	14	0.839873	1.8948	0.00102041	0.0103478	Gardiquimod
GO:0001562	response to protozoan	13	0.871843	1.94433	0.00102145	0.0103478	Gardiquimod
GO:0042832	defense response to protozoan	13	0.871843	1.94433	0.00102145	0.0103478	Gardiquimod
GO:0002675	positive regulation of acute inflammatory response	12	0.791449	1.74072	0.00103093	0.0103478	Gardiquimod
GO:0010818	T cell chemotaxis	12	0.825754	1.81617	0.00103093	0.0103478	Gardiquimod
GO:0042532	negative regulation of tyrosine phosphorylation of STAT protein	12	0.804161	1.76868	0.00103093	0.0103478	Gardiquimod
GO:0045662	negative regulation of myoblast differentiation	12	0.793028	1.7442	0.00103093	0.0103478	Gardiquimod
GO:0051023	regulation of immunoglobulin secretion	12	0.798493	1.75621	0.00103093	0.0103478	Gardiquimod
GO:2000316	regulation of T-helper 17 type immune response	12	0.866655	1.90613	0.00103093	0.0103478	Gardiquimod
GO:0007252	I-kappaB phosphorylation	11	0.874565	1.90411	0.00104275	0.0103874	Gardiquimod
GO:0051043	regulation of membrane protein ectodomain proteolysis	11	0.876492	1.9083	0.00104275	0.0103874	Gardiquimod
GO:2000319	regulation of T-helper 17 cell differentiation	11	0.89249	1.94313	0.00104275	0.0103874	Gardiquimod
GO:0001961	positive regulation of cytokine-mediated signaling pathway	36	0.615285	1.54542	0.001998	0.0180338	Gardiquimod
GO:0002218	activation of innate immune response	215	0.460138	1.26811	0.001998	0.0180338	Gardiquimod
GO:0002573	myeloid leukocyte differentiation	120	0.501256	1.35085	0.001998	0.0180338	Gardiquimod
GO:0002705	positive regulation of leukocyte mediated immunity	79	0.543662	1.42923	0.001998	0.0180338	Gardiquimod
GO:0007254	JNK cascade	132	0.495159	1.34452	0.001998	0.0180338	Gardiquimod
GO:0009887	animal organ morphogenesis	433	0.421004	1.18442	0.001998	0.0180338	Gardiquimod
GO:0018108	peptidyl-tyrosine phosphorylation	176	0.474252	1.29877	0.001998	0.0180338	Gardiquimod
GO:0030278	regulation of ossification	88	0.509569	1.34684	0.001998	0.0180338	Gardiquimod
GO:0031960	response to corticosteroid	72	0.556082	1.45396	0.001998	0.0180338	Gardiquimod
GO:0033209	tumor necrosis factor-mediated signaling pathway	125	0.508532	1.37455	0.001998	0.0180338	Gardiquimod
GO:0035821	modification of morphology or physiology of other organism	86	0.52694	1.39114	0.001998	0.0180338	Gardiquimod
GO:0043123	positive regulation of I-kappaB kinase/NF-kappaB signaling	131	0.497223	1.3496	0.001998	0.0180338	Gardiquimod
GO:0043280	positive regulation of cysteine-type endopeptidase activity involved in apoptotic process	92	0.506165	1.34119	0.001998	0.0180338	Gardiquimod
GO:0043433	negative regulation of DNA-binding transcription factor activity	109	0.500623	1.34056	0.001998	0.0180338	Gardiquimod
GO:0043491	protein kinase B signaling	120	0.495659	1.33577	0.001998	0.0180338	Gardiquimod
GO:0043547	positive regulation of GTPase activity	245	0.451866	1.2513	0.001998	0.0180338	Gardiquimod
GO:0045444	fat cell differentiation	115	0.506666	1.36282	0.001998	0.0180338	Gardiquimod
GO:0045598	regulation of fat cell differentiation	63	0.552529	1.43803	0.001998	0.0180338	Gardiquimod
GO:0046330	positive regulation of JNK cascade	82	0.549909	1.44822	0.001998	0.0180338	Gardiquimod
GO:0046651	lymphocyte proliferation	158	0.48346	1.31909	0.001998	0.0180338	Gardiquimod
GO:0048514	blood vessel morphogenesis	260	0.446653	1.24006	0.001998	0.0180338	Gardiquimod
GO:0050730	regulation of peptidyl-tyrosine phosphorylation	118	0.503697	1.35726	0.001998	0.0180338	Gardiquimod
GO:0050920	regulation of chemotaxis	92	0.500136	1.32522	0.001998	0.0180338	Gardiquimod
GO:0051046	regulation of secretion	366	0.43026	1.20761	0.001998	0.0180338	Gardiquimod
GO:0051092	positive regulation of NF-kappaB transcription factor activity	103	0.507932	1.35428	0.001998	0.0180338	Gardiquimod
GO:0070661	leukocyte proliferation	164	0.479604	1.30978	0.001998	0.0180338	Gardiquimod
GO:1901342	regulation of vasculature development	143	0.48082	1.30733	0.001998	0.0180338	Gardiquimod
GO:2000116	regulation of cysteine-type endopeptidase activity	161	0.467848	1.2765	0.001998	0.0180338	Gardiquimod
GO:0031663	lipopolysaccharide-mediated signaling pathway	39	0.613011	1.55219	0.002	0.0180338	Gardiquimod
GO:0042108	positive regulation of cytokine biosynthetic process	39	0.617099	1.56255	0.002	0.0180338	Gardiquimod
GO:0050856	regulation of T cell receptor signaling pathway	31	0.618212	1.53361	0.002	0.0180338	Gardiquimod
GO:0072073	kidney epithelium development	50	0.562693	1.45019	0.002	0.0180338	Gardiquimod
GO:0097300	programmed necrotic cell death	31	0.619597	1.53705	0.002	0.0180338	Gardiquimod
GO:1901343	negative regulation of vasculature development	43	0.588243	1.5013	0.002	0.0180338	Gardiquimod
GO:0002820	negative regulation of adaptive immune response	26	0.635421	1.54855	0.00200401	0.0180338	Gardiquimod
GO:0043330	response to exogenous dsRNA	26	0.644772	1.57134	0.00200401	0.0180338	Gardiquimod
GO:0045599	negative regulation of fat cell differentiation	26	0.647674	1.57842	0.00200401	0.0180338	Gardiquimod
GO:0061028	establishment of endothelial barrier	26	0.637873	1.55453	0.00200401	0.0180338	Gardiquimod
GO:0061157	mRNA destabilization	27	0.629797	1.54327	0.00200401	0.0180338	Gardiquimod
GO:0070266	necroptotic process	26	0.631943	1.54008	0.00200401	0.0180338	Gardiquimod
GO:1904407	positive regulation of nitric oxide metabolic process	22	0.686499	1.64427	0.00200803	0.0180338	Gardiquimod
GO:0046006	regulation of activated T cell proliferation	18	0.714388	1.66864	0.0020141	0.0180338	Gardiquimod
GO:0071243	cellular response to arsenic-containing substance	18	0.710121	1.65867	0.0020141	0.0180338	Gardiquimod
GO:0043371	negative regulation of CD4-positive, alpha-beta T cell differentiation	16	0.752039	1.73137	0.0020202	0.0180338	Gardiquimod
GO:2000406	positive regulation of T cell migration	17	0.731183	1.69102	0.00202224	0.0180338	Gardiquimod
GO:0070168	negative regulation of biomineral tissue development	14	0.759527	1.71354	0.00204082	0.0180338	Gardiquimod
GO:0070229	negative regulation of lymphocyte apoptotic process	14	0.790264	1.78288	0.00204082	0.0180338	Gardiquimod
GO:0070230	positive regulation of lymphocyte apoptotic process	14	0.765421	1.72683	0.00204082	0.0180338	Gardiquimod
GO:2000778	positive regulation of interleukin-6 secretion	14	0.789554	1.78128	0.00204082	0.0180338	Gardiquimod
GO:0061081	positive regulation of myeloid leukocyte cytokine production involved in immune response	13	0.781586	1.74305	0.0020429	0.0180338	Gardiquimod
GO:0071677	positive regulation of mononuclear cell migration	13	0.793118	1.76876	0.0020429	0.0180338	Gardiquimod
GO:0045623	negative regulation of T-helper cell differentiation	12	0.777994	1.71113	0.00206186	0.0181606	Gardiquimod
GO:0002739	regulation of cytokine secretion involved in immune response	11	0.810223	1.76402	0.00208551	0.0183281	Gardiquimod
GO:0043922	negative regulation by host of viral transcription	10	0.853699	1.82526	0.00210526	0.0184198	Gardiquimod
GO:0044342	type B pancreatic cell proliferation	10	0.843661	1.8038	0.00210526	0.0184198	Gardiquimod
GO:0002712	regulation of B cell mediated immunity	36	0.610609	1.53368	0.002997	0.0244074	Gardiquimod
GO:0002889	regulation of immunoglobulin mediated immune response	36	0.610609	1.53368	0.002997	0.0244074	Gardiquimod
GO:0010721	negative regulation of cell development	151	0.468244	1.27604	0.002997	0.0244074	Gardiquimod
GO:0014065	phosphatidylinositol 3-kinase signaling	80	0.52554	1.38277	0.002997	0.0244074	Gardiquimod
GO:0030198	extracellular matrix organization	121	0.489359	1.31956	0.002997	0.0244074	Gardiquimod
GO:0042129	regulation of T cell proliferation	86	0.51443	1.35811	0.002997	0.0244074	Gardiquimod
GO:0045637	regulation of myeloid cell differentiation	150	0.465631	1.26889	0.002997	0.0244074	Gardiquimod
GO:0045670	regulation of osteoclast differentiation	35	0.604685	1.51622	0.002997	0.0244074	Gardiquimod
GO:0045765	regulation of angiogenesis	127	0.490382	1.3278	0.002997	0.0244074	Gardiquimod
GO:0051051	negative regulation of transport	236	0.447913	1.23919	0.002997	0.0244074	Gardiquimod
GO:0051961	negative regulation of nervous system development	139	0.478328	1.29986	0.002997	0.0244074	Gardiquimod
GO:2001056	positive regulation of cysteine-type endopeptidase activity	102	0.501335	1.33578	0.002997	0.0244074	Gardiquimod
GO:2001238	positive regulation of extrinsic apoptotic signaling pathway	35	0.612821	1.53662	0.002997	0.0244074	Gardiquimod
GO:0002637	regulation of immunoglobulin production	44	0.565602	1.44484	0.003	0.0244074	Gardiquimod
GO:0014068	positive regulation of phosphatidylinositol 3-kinase signaling	44	0.57822	1.47707	0.003	0.0244074	Gardiquimod
GO:0016525	negative regulation of angiogenesis	38	0.60575	1.53023	0.003	0.0244074	Gardiquimod
GO:0030279	negative regulation of ossification	38	0.589905	1.4902	0.003	0.0244074	Gardiquimod
GO:0030888	regulation of B cell proliferation	44	0.565371	1.44425	0.003	0.0244074	Gardiquimod
GO:0033619	membrane protein proteolysis	38	0.590069	1.49062	0.003	0.0244074	Gardiquimod
GO:0070265	necrotic cell death	38	0.597206	1.50865	0.003	0.0244074	Gardiquimod
GO:0070542	response to fatty acid	45	0.567904	1.45301	0.003	0.0244074	Gardiquimod
GO:1905954	positive regulation of lipid localization	37	0.619747	1.56255	0.003	0.0244074	Gardiquimod
GO:2000181	negative regulation of blood vessel morphogenesis	38	0.60575	1.53023	0.003	0.0244074	Gardiquimod
GO:0034113	heterotypic cell-cell adhesion	27	0.625985	1.53393	0.00300601	0.0244074	Gardiquimod
GO:0045589	regulation of regulatory T cell differentiation	23	0.658511	1.58583	0.00300601	0.0244074	Gardiquimod
GO:0050702	interleukin-1 beta secretion	27	0.62148	1.52289	0.00300601	0.0244074	Gardiquimod
GO:0050779	RNA destabilization	29	0.616173	1.52012	0.00300601	0.0244074	Gardiquimod
GO:0002714	positive regulation of B cell mediated immunity	28	0.619551	1.52228	0.00300903	0.0244074	Gardiquimod
GO:0002891	positive regulation of immunoglobulin mediated immune response	28	0.619551	1.52228	0.00300903	0.0244074	Gardiquimod
GO:1902042	negative regulation of extrinsic apoptotic signaling pathway via death domain receptors	24	0.657539	1.59023	0.00300903	0.0244074	Gardiquimod
GO:0044068	modulation by symbiont of host cellular process	21	0.68485	1.63284	0.00301205	0.0244074	Gardiquimod
GO:0061756	leukocyte adhesion to vascular endothelial cell	20	0.688402	1.63221	0.00301205	0.0244074	Gardiquimod
GO:1903524	positive regulation of blood circulation	20	0.687927	1.63108	0.00301205	0.0244074	Gardiquimod
GO:0002920	regulation of humoral immune response	19	0.690287	1.62803	0.00302115	0.0244074	Gardiquimod
GO:0046530	photoreceptor cell differentiation	19	0.691399	1.63066	0.00302115	0.0244074	Gardiquimod
GO:0032727	positive regulation of interferon-alpha production	16	0.725543	1.67037	0.0030303	0.0244074	Gardiquimod
GO:0042994	cytoplasmic sequestering of transcription factor	16	0.730375	1.6815	0.0030303	0.0244074	Gardiquimod
GO:0048305	immunoglobulin secretion	16	0.750357	1.7275	0.0030303	0.0244074	Gardiquimod
GO:2001024	negative regulation of response to drug	16	0.734219	1.69035	0.0030303	0.0244074	Gardiquimod
GO:0071360	cellular response to exogenous dsRNA	14	0.752281	1.69719	0.00306122	0.0245318	Gardiquimod
GO:0002374	cytokine secretion involved in immune response	13	0.761538	1.69834	0.00306435	0.0245318	Gardiquimod
GO:0032688	negative regulation of interferon-beta production	13	0.76701	1.71054	0.00306435	0.0245318	Gardiquimod
GO:0045019	negative regulation of nitric oxide biosynthetic process	10	0.83561	1.78659	0.00315789	0.0250273	Gardiquimod
GO:0070234	positive regulation of T cell apoptotic process	10	0.798575	1.7074	0.00315789	0.0250273	Gardiquimod
GO:1901623	regulation of lymphocyte chemotaxis	10	0.830134	1.77488	0.00315789	0.0250273	Gardiquimod
GO:1904406	negative regulation of nitric oxide metabolic process	10	0.83561	1.78659	0.00315789	0.0250273	Gardiquimod
GO:2000628	regulation of miRNA metabolic process	10	0.82402	1.76181	0.00315789	0.0250273	Gardiquimod
GO:0002758	innate immune response-activating signal transduction	198	0.450433	1.23814	0.003996	0.0295556	Gardiquimod
GO:0007517	muscle organ development	168	0.460659	1.25871	0.003996	0.0295556	Gardiquimod
GO:0007600	sensory perception	155	0.459401	1.25302	0.003996	0.0295556	Gardiquimod
GO:0010876	lipid localization	183	0.448909	1.23087	0.003996	0.0295556	Gardiquimod
GO:0016064	immunoglobulin mediated immune response	69	0.533231	1.39168	0.003996	0.0295556	Gardiquimod
GO:0019915	lipid storage	36	0.586672	1.47355	0.003996	0.0295556	Gardiquimod
GO:0030099	myeloid cell differentiation	262	0.439464	1.21993	0.003996	0.0295556	Gardiquimod
GO:0045665	negative regulation of neuron differentiation	98	0.491988	1.30824	0.003996	0.0295556	Gardiquimod
GO:0050673	epithelial cell proliferation	181	0.456732	1.25192	0.003996	0.0295556	Gardiquimod
GO:0050808	synapse organization	144	0.472322	1.28473	0.003996	0.0295556	Gardiquimod
GO:0050921	positive regulation of chemotaxis	60	0.530728	1.37788	0.003996	0.0295556	Gardiquimod
GO:0052548	regulation of endopeptidase activity	214	0.451181	1.24359	0.003996	0.0295556	Gardiquimod
GO:0060562	epithelial tube morphogenesis	154	0.463507	1.26356	0.003996	0.0295556	Gardiquimod
GO:0071407	cellular response to organic cyclic compound	318	0.431183	1.20385	0.003996	0.0295556	Gardiquimod
GO:2000378	negative regulation of reactive oxygen species metabolic process	35	0.580997	1.45683	0.003996	0.0295556	Gardiquimod
GO:0006939	smooth muscle contraction	39	0.580921	1.47094	0.004	0.0295556	Gardiquimod
GO:0007187	G protein-coupled receptor signaling pathway, coupled to cyclic nucleotide second messenger	50	0.548252	1.41297	0.004	0.0295556	Gardiquimod
GO:0007188	adenylate cyclase-modulating G protein-coupled receptor signaling pathway	46	0.553972	1.41913	0.004	0.0295556	Gardiquimod
GO:0010803	regulation of tumor necrosis factor-mediated signaling pathway	43	0.578108	1.47544	0.004	0.0295556	Gardiquimod
GO:0032760	positive regulation of tumor necrosis factor production	49	0.559248	1.43966	0.004	0.0295556	Gardiquimod
GO:0032945	negative regulation of mononuclear cell proliferation	41	0.585957	1.48977	0.004	0.0295556	Gardiquimod
GO:0034121	regulation of toll-like receptor signaling pathway	39	0.580387	1.46959	0.004	0.0295556	Gardiquimod
GO:0046173	polyol biosynthetic process	42	0.578038	1.47222	0.004	0.0295556	Gardiquimod
GO:0050672	negative regulation of lymphocyte proliferation	41	0.585957	1.48977	0.004	0.0295556	Gardiquimod
GO:0051851	modification by host of symbiont morphology or physiology	45	0.558827	1.42978	0.004	0.0295556	Gardiquimod
GO:1904705	regulation of vascular smooth muscle cell proliferation	31	0.602199	1.49389	0.004	0.0295556	Gardiquimod
GO:1990874	vascular smooth muscle cell proliferation	31	0.602199	1.49389	0.004	0.0295556	Gardiquimod
GO:2000379	positive regulation of reactive oxygen species metabolic process	50	0.553263	1.42589	0.004	0.0295556	Gardiquimod
GO:0002534	cytokine production involved in inflammatory response	26	0.625791	1.52509	0.00400802	0.0295556	Gardiquimod
GO:0014009	glial cell proliferation	27	0.617084	1.51211	0.00400802	0.0295556	Gardiquimod
GO:0045058	T cell selection	29	0.60824	1.50055	0.00400802	0.0295556	Gardiquimod
GO:0045661	regulation of myoblast differentiation	23	0.64477	1.55274	0.00400802	0.0295556	Gardiquimod
GO:2000404	regulation of T cell migration	26	0.626857	1.52768	0.00400802	0.0295556	Gardiquimod
GO:0050701	interleukin-1 secretion	28	0.61424	1.50923	0.00401204	0.0295556	Gardiquimod
GO:0001774	microglial cell activation	21	0.658077	1.569	0.00401606	0.0295556	Gardiquimod
GO:0002269	leukocyte activation involved in inflammatory response	21	0.658077	1.569	0.00401606	0.0295556	Gardiquimod
GO:0050798	activated T cell proliferation	21	0.672791	1.60409	0.00401606	0.0295556	Gardiquimod
GO:0060251	regulation of glial cell proliferation	21	0.654057	1.55942	0.00401606	0.0295556	Gardiquimod
GO:0030212	hyaluronan metabolic process	19	0.678594	1.60046	0.0040282	0.0295556	Gardiquimod
GO:1902622	regulation of neutrophil migration	18	0.70148	1.63849	0.0040282	0.0295556	Gardiquimod
GO:1902624	positive regulation of neutrophil migration	16	0.723337	1.66529	0.0040404	0.0295654	Gardiquimod
GO:0032800	receptor biosynthetic process	17	0.702317	1.62426	0.00404449	0.0295654	Gardiquimod
GO:0071731	response to nitric oxide	13	0.752312	1.67776	0.0040858	0.0297574	Gardiquimod
GO:1904994	regulation of leukocyte adhesion to vascular endothelial cell	13	0.751393	1.67571	0.0040858	0.0297574	Gardiquimod
GO:0001655	urogenital system development	145	0.4681	1.27332	0.004995	0.0343329	Gardiquimod
GO:0001657	ureteric bud development	35	0.56997	1.42918	0.004995	0.0343329	Gardiquimod
GO:0006650	glycerophospholipid metabolic process	227	0.443298	1.22601	0.004995	0.0343329	Gardiquimod
GO:0019724	B cell mediated immunity	70	0.535476	1.3978	0.004995	0.0343329	Gardiquimod
GO:0042100	B cell proliferation	57	0.544948	1.41225	0.004995	0.0343329	Gardiquimod
GO:0043062	extracellular structure organization	144	0.469808	1.2779	0.004995	0.0343329	Gardiquimod
GO:0043281	regulation of cysteine-type endopeptidase activity involved in apoptotic process	148	0.46673	1.27083	0.004995	0.0343329	Gardiquimod
GO:0046474	glycerophospholipid biosynthetic process	163	0.454618	1.24102	0.004995	0.0343329	Gardiquimod
GO:0048608	reproductive structure development	203	0.446403	1.22813	0.004995	0.0343329	Gardiquimod
GO:0050678	regulation of epithelial cell proliferation	156	0.457376	1.24745	0.004995	0.0343329	Gardiquimod
GO:0050807	regulation of synapse organization	78	0.517915	1.36119	0.004995	0.0343329	Gardiquimod
GO:0050852	T cell receptor signaling pathway	148	0.467106	1.27185	0.004995	0.0343329	Gardiquimod
GO:0051235	maintenance of location	191	0.44912	1.23352	0.004995	0.0343329	Gardiquimod
GO:0051817	modification of morphology or physiology of other organism involved in symbiotic interaction	74	0.530142	1.38935	0.004995	0.0343329	Gardiquimod
GO:0051897	positive regulation of protein kinase B signaling	70	0.531426	1.38723	0.004995	0.0343329	Gardiquimod
GO:0052547	regulation of peptidase activity	226	0.444372	1.22882	0.004995	0.0343329	Gardiquimod
GO:0061458	reproductive system development	205	0.444902	1.22438	0.004995	0.0343329	Gardiquimod
GO:1901215	negative regulation of neuron death	114	0.48749	1.30975	0.004995	0.0343329	Gardiquimod
GO:0002532	production of molecular mediator involved in inflammatory response	39	0.574805	1.45545	0.005	0.0343329	Gardiquimod
GO:0014015	positive regulation of gliogenesis	37	0.581101	1.46511	0.005	0.0343329	Gardiquimod
GO:0044003	modification by symbiont of host morphology or physiology	33	0.584279	1.45778	0.005	0.0343329	Gardiquimod
GO:0048640	negative regulation of developmental growth	47	0.556144	1.42528	0.005	0.0343329	Gardiquimod
GO:0050854	regulation of antigen receptor-mediated signaling pathway	51	0.542912	1.40112	0.005	0.0343329	Gardiquimod
GO:0051702	interaction with symbiont	49	0.544876	1.40267	0.005	0.0343329	Gardiquimod
GO:0050886	endocrine process	23	0.641056	1.5438	0.00501002	0.0343329	Gardiquimod
GO:0150076	neuroinflammatory response	27	0.614791	1.5065	0.00501002	0.0343329	Gardiquimod
GO:0043921	modulation by host of viral transcription	24	0.64575	1.56172	0.00501505	0.0343329	Gardiquimod
GO:0050704	regulation of interleukin-1 secretion	24	0.647538	1.56605	0.00501505	0.0343329	Gardiquimod
GO:0050706	regulation of interleukin-1 beta secretion	24	0.647538	1.56605	0.00501505	0.0343329	Gardiquimod
GO:0052312	modulation of transcription in other organism involved in symbiotic interaction	24	0.64575	1.56172	0.00501505	0.0343329	Gardiquimod
GO:0052472	modulation by host of symbiont transcription	24	0.64575	1.56172	0.00501505	0.0343329	Gardiquimod
GO:1900015	regulation of cytokine production involved in inflammatory response	24	0.637344	1.54139	0.00501505	0.0343329	Gardiquimod
GO:0051220	cytoplasmic sequestering of protein	22	0.65577	1.57067	0.00502008	0.0343329	Gardiquimod
GO:0060674	placenta blood vessel development	21	0.64419	1.5359	0.00502008	0.0343329	Gardiquimod
GO:0061900	glial cell activation	22	0.655234	1.56938	0.00502008	0.0343329	Gardiquimod
GO:0032350	regulation of hormone metabolic process	19	0.673667	1.58884	0.00503525	0.0343329	Gardiquimod
GO:0046640	regulation of alpha-beta T cell proliferation	18	0.679176	1.58639	0.00503525	0.0343329	Gardiquimod
GO:0019054	modulation by virus of host process	17	0.691883	1.60013	0.00505561	0.0343639	Gardiquimod
GO:0042461	photoreceptor cell development	15	0.727154	1.66573	0.00506586	0.0343639	Gardiquimod
GO:0046885	regulation of hormone biosynthetic process	15	0.718849	1.6467	0.00506586	0.0343639	Gardiquimod
GO:0060252	positive regulation of glial cell proliferation	13	0.742134	1.65506	0.00510725	0.0345853	Gardiquimod
GO:0002726	positive regulation of T cell cytokine production	12	0.758588	1.66845	0.00515464	0.0346688	Gardiquimod
GO:0090085	regulation of protein deubiquitination	12	0.75444	1.65933	0.00515464	0.0346688	Gardiquimod
GO:1902074	response to salt	12	0.759211	1.66982	0.00515464	0.0346688	Gardiquimod
GO:1904996	positive regulation of leukocyte adhesion to vascular endothelial cell	12	0.758861	1.66905	0.00515464	0.0346688	Gardiquimod
GO:1900016	negative regulation of cytokine production involved in inflammatory response	11	0.762109	1.65927	0.00521376	0.0350069	Gardiquimod
GO:0045932	negative regulation of muscle contraction	10	0.779642	1.66692	0.00526316	0.035219	Gardiquimod
GO:0048535	lymph node development	10	0.777276	1.66186	0.00526316	0.035219	Gardiquimod
GO:0001823	mesonephros development	36	0.569031	1.42925	0.00599401	0.0390452	Gardiquimod
GO:0002702	positive regulation of production of molecular mediator of immune response	62	0.527603	1.37203	0.00599401	0.0390452	Gardiquimod
GO:0002708	positive regulation of lymphocyte mediated immunity	61	0.534955	1.38847	0.00599401	0.0390452	Gardiquimod
GO:0014066	regulation of phosphatidylinositol 3-kinase signaling	67	0.522126	1.36025	0.00599401	0.0390452	Gardiquimod
GO:0032091	negative regulation of protein binding	67	0.518565	1.35097	0.00599401	0.0390452	Gardiquimod
GO:0032946	positive regulation of mononuclear cell proliferation	74	0.521908	1.36777	0.00599401	0.0390452	Gardiquimod
GO:0045639	positive regulation of myeloid cell differentiation	53	0.550265	1.42433	0.00599401	0.0390452	Gardiquimod
GO:0046579	positive regulation of Ras protein signal transduction	36	0.567859	1.4263	0.00599401	0.0390452	Gardiquimod
GO:0048660	regulation of smooth muscle cell proliferation	70	0.527365	1.37663	0.00599401	0.0390452	Gardiquimod
GO:0050671	positive regulation of lymphocyte proliferation	73	0.516507	1.35158	0.00599401	0.0390452	Gardiquimod
GO:0050768	negative regulation of neurogenesis	128	0.472302	1.2798	0.00599401	0.0390452	Gardiquimod
GO:0050803	regulation of synapse structure or activity	81	0.50525	1.33127	0.00599401	0.0390452	Gardiquimod
GO:0070665	positive regulation of leukocyte proliferation	76	0.518205	1.36042	0.00599401	0.0390452	Gardiquimod
GO:0072163	mesonephric epithelium development	36	0.569031	1.42925	0.00599401	0.0390452	Gardiquimod
GO:0072164	mesonephric tubule development	36	0.569031	1.42925	0.00599401	0.0390452	Gardiquimod
GO:0061647	histone H3-K9 modification	37	0.570791	1.43911	0.006	0.0390452	Gardiquimod
GO:0002673	regulation of acute inflammatory response	30	0.603612	1.49363	0.00600601	0.0390452	Gardiquimod
GO:0045948	positive regulation of translational initiation	24	0.635795	1.53765	0.00601805	0.0390452	Gardiquimod
GO:0071675	regulation of mononuclear cell migration	22	0.645884	1.54699	0.0060241	0.0390452	Gardiquimod
GO:0071392	cellular response to estradiol stimulus	19	0.666564	1.57208	0.0060423	0.0390452	Gardiquimod
GO:0071604	transforming growth factor beta production	19	0.654673	1.54404	0.0060423	0.0390452	Gardiquimod
GO:0034162	toll-like receptor 9 signaling pathway	17	0.687552	1.59011	0.00606673	0.0391392	Gardiquimod
GO:0019430	removal of superoxide radicals	14	0.725508	1.63679	0.00612245	0.0394343	Gardiquimod
GO:0060713	labyrinthine layer morphogenesis	10	0.77121	1.64889	0.00631579	0.0406135	Gardiquimod
GO:0001936	regulation of endothelial cell proliferation	55	0.532851	1.38032	0.00699301	0.0441518	Gardiquimod
GO:0030162	regulation of proteolysis	429	0.413488	1.16319	0.00699301	0.0441518	Gardiquimod
GO:0030178	negative regulation of Wnt signaling pathway	120	0.470809	1.2688	0.00699301	0.0441518	Gardiquimod
GO:0030316	osteoclast differentiation	58	0.532682	1.38166	0.00699301	0.0441518	Gardiquimod
GO:0048659	smooth muscle cell proliferation	71	0.519285	1.35747	0.00699301	0.0441518	Gardiquimod
GO:0050851	antigen receptor-mediated signaling pathway	184	0.443311	1.21559	0.00699301	0.0441518	Gardiquimod
GO:0051960	regulation of nervous system development	421	0.415403	1.16812	0.00699301	0.0441518	Gardiquimod
GO:1903510	mucopolysaccharide metabolic process	58	0.523814	1.35866	0.00699301	0.0441518	Gardiquimod
GO:2000377	regulation of reactive oxygen species metabolic process	104	0.48365	1.29072	0.00699301	0.0441518	Gardiquimod
GO:0050764	regulation of phagocytosis	49	0.54015	1.3905	0.007	0.0441518	Gardiquimod
GO:0050766	positive regulation of phagocytosis	33	0.582893	1.45432	0.007	0.0441518	Gardiquimod
GO:1904035	regulation of epithelial cell apoptotic process	38	0.570577	1.44138	0.007	0.0441518	Gardiquimod
GO:0050850	positive regulation of calcium-mediated signaling	23	0.631947	1.52186	0.00701403	0.0441698	Gardiquimod
GO:0002455	humoral immune response mediated by circulating immunoglobulin	18	0.665013	1.55331	0.00704935	0.0441812	Gardiquimod
GO:1901099	negative regulation of signal transduction in absence of ligand	18	0.670346	1.56577	0.00704935	0.0441812	Gardiquimod
GO:2001240	negative regulation of extrinsic apoptotic signaling pathway in absence of ligand	18	0.670346	1.56577	0.00704935	0.0441812	Gardiquimod
GO:0033280	response to vitamin D	16	0.695794	1.60188	0.00707071	0.0442449	Gardiquimod
GO:0051930	regulation of sensory perception of pain	11	0.753492	1.64051	0.00729927	0.0455311	Gardiquimod
GO:0051931	regulation of sensory perception	11	0.753492	1.64051	0.00729927	0.0455311	Gardiquimod
GO:0001822	kidney development	124	0.472338	1.2758	0.00799201	0.0491272	Gardiquimod
GO:0001890	placenta development	77	0.50449	1.32559	0.00799201	0.0491272	Gardiquimod
GO:0002768	immune response-regulating cell surface receptor signaling pathway	275	0.426566	1.18582	0.00799201	0.0491272	Gardiquimod
GO:0006919	activation of cysteine-type endopeptidase activity involved in apoptotic process	60	0.525311	1.36381	0.00799201	0.0491272	Gardiquimod
GO:0032088	negative regulation of NF-kappaB transcription factor activity	60	0.528357	1.37172	0.00799201	0.0491272	Gardiquimod
GO:0045165	cell fate commitment	77	0.501229	1.31702	0.00799201	0.0491272	Gardiquimod
GO:0045860	positive regulation of protein kinase activity	303	0.42668	1.18837	0.00799201	0.0491272	Gardiquimod
GO:0046677	response to antibiotic	193	0.446366	1.2259	0.00799201	0.0491272	Gardiquimod
GO:0051896	regulation of protein kinase B signaling	107	0.48353	1.29303	0.00799201	0.0491272	Gardiquimod
GO:0090199	regulation of release of cytochrome c from mitochondria	40	0.551385	1.39903	0.008	0.0491272	Gardiquimod
GO:0060711	labyrinthine layer development	25	0.628185	1.52737	0.00801603	0.0491493	Gardiquimod
GO:0036037	CD8-positive, alpha-beta T cell activation	15	0.698107	1.59919	0.00810537	0.0496201	Gardiquimod
GO:0061158	3'-UTR-mediated mRNA destabilization	13	0.737211	1.64408	0.0081716	0.0498712	Gardiquimod
GO:2001185	regulation of CD8-positive, alpha-beta T cell activation	13	0.736921	1.64344	0.0081716	0.0498712	Gardiquimod
GO:0060965	negative regulation of gene silencing by miRNA	11	0.749824	1.63252	0.00834202	0.0507546	Gardiquimod
GO:0090025	regulation of monocyte chemotaxis	11	0.749094	1.63093	0.00834202	0.0507546	Gardiquimod
GO:0110111	negative regulation of animal organ morphogenesis	10	0.763077	1.6315	0.00842105	0.0511568	Gardiquimod
GO:0001503	ossification	178	0.442353	1.2122	0.00899101	0.0538191	Gardiquimod
GO:0007204	positive regulation of cytosolic calcium ion concentration	127	0.466862	1.26412	0.00899101	0.0538191	Gardiquimod
GO:0014013	regulation of gliogenesis	57	0.522337	1.35365	0.00899101	0.0538191	Gardiquimod
GO:0042098	T cell proliferation	109	0.477005	1.27732	0.00899101	0.0538191	Gardiquimod
GO:0044057	regulation of system process	206	0.437177	1.20322	0.00899101	0.0538191	Gardiquimod
GO:0045017	glycerolipid biosynthetic process	179	0.44211	1.2111	0.00899101	0.0538191	Gardiquimod
GO:0072001	renal system development	126	0.468086	1.26646	0.00899101	0.0538191	Gardiquimod
GO:0048016	inositol phosphate-mediated signaling	33	0.575811	1.43665	0.009	0.0538191	Gardiquimod
GO:0048565	digestive tract development	43	0.547244	1.39667	0.009	0.0538191	Gardiquimod
GO:0070423	nucleotide-binding oligomerization domain containing signaling pathway	31	0.585513	1.45249	0.009	0.0538191	Gardiquimod
GO:0032732	positive regulation of interleukin-1 production	30	0.591468	1.46358	0.00900901	0.0538191	Gardiquimod
GO:0002719	negative regulation of cytokine production involved in immune response	14	0.716387	1.61621	0.00918367	0.0547798	Gardiquimod
GO:1904467	regulation of tumor necrosis factor secretion	12	0.748069	1.64531	0.00927835	0.0552612	Gardiquimod
GO:1901032	negative regulation of response to reactive oxygen species	11	0.741439	1.61427	0.00938478	0.0556437	Gardiquimod
GO:1903206	negative regulation of hydrogen peroxide-induced cell death	11	0.741439	1.61427	0.00938478	0.0556437	Gardiquimod
GO:2001039	negative regulation of cellular response to drug	11	0.741439	1.61427	0.00938478	0.0556437	Gardiquimod
GO:0010829	negative regulation of glucose transmembrane transport	10	0.759728	1.62434	0.00947368	0.0560867	Gardiquimod
GO:0030203	glycosaminoglycan metabolic process	74	0.495488	1.29853	0.00999001	0.0584775	Gardiquimod
GO:0033674	positive regulation of kinase activity	328	0.419024	1.17175	0.00999001	0.0584775	Gardiquimod
GO:0043902	positive regulation of multi-organism process	135	0.462082	1.25502	0.00999001	0.0584775	Gardiquimod
GO:0050767	regulation of neurogenesis	391	0.410935	1.15427	0.00999001	0.0584775	Gardiquimod
GO:0060993	kidney morphogenesis	35	0.562165	1.40961	0.00999001	0.0584775	Gardiquimod
GO:0045445	myoblast differentiation	42	0.554998	1.41354	0.01	0.0584775	Gardiquimod
GO:0061326	renal tubule development	34	0.574326	1.43901	0.01	0.0584775	Gardiquimod
GO:0072080	nephron tubule development	34	0.574326	1.43901	0.01	0.0584775	Gardiquimod
GO:0001656	metanephros development	29	0.589017	1.45312	0.01002	0.0584775	Gardiquimod
GO:0048147	negative regulation of fibroblast proliferation	22	0.625908	1.49914	0.0100402	0.0584775	Gardiquimod
GO:0050869	negative regulation of B cell activation	20	0.634165	1.50361	0.0100402	0.0584775	Gardiquimod
GO:1903204	negative regulation of oxidative stress-induced neuron death	17	0.668844	1.54684	0.0101112	0.0588047	Gardiquimod
GO:0045624	positive regulation of T-helper cell differentiation	13	0.731939	1.63233	0.0102145	0.0593182	Gardiquimod
GO:0045061	thymic T cell selection	12	0.740673	1.62905	0.0103093	0.0597808	Gardiquimod
GO:2000810	regulation of bicellular tight junction assembly	10	0.756958	1.61842	0.0105263	0.0609499	Gardiquimod
GO:0035265	organ growth	81	0.49367	1.30076	0.010989	0.0629349	Gardiquimod
GO:0042445	hormone metabolic process	71	0.502245	1.31293	0.010989	0.0629349	Gardiquimod
GO:0097237	cellular response to toxic substance	141	0.464162	1.26099	0.010989	0.0629349	Gardiquimod
GO:0031295	T cell costimulation	38	0.549839	1.38899	0.011	0.0629349	Gardiquimod
GO:0071385	cellular response to glucocorticoid stimulus	32	0.575965	1.43366	0.011	0.0629349	Gardiquimod
GO:0072009	nephron epithelium development	38	0.55432	1.40031	0.011	0.0629349	Gardiquimod
GO:0071398	cellular response to fatty acid	29	0.581824	1.43538	0.011022	0.0629349	Gardiquimod
GO:0002369	T cell cytokine production	22	0.616434	1.47645	0.0110442	0.0629349	Gardiquimod
GO:0035094	response to nicotine	22	0.62355	1.49349	0.0110442	0.0629349	Gardiquimod
GO:0042310	vasoconstriction	22	0.622395	1.49073	0.0110442	0.0629349	Gardiquimod
GO:0046633	alpha-beta T cell proliferation	21	0.629292	1.50038	0.0110442	0.0629349	Gardiquimod
GO:0007520	myoblast fusion	17	0.656237	1.51769	0.0111223	0.0632891	Gardiquimod
GO:1990774	tumor necrosis factor secretion	15	0.689395	1.57923	0.0111449	0.0633263	Gardiquimod
GO:0032616	interleukin-13 production	10	0.751027	1.60574	0.0115789	0.0656983	Gardiquimod
GO:0001763	morphogenesis of a branching structure	81	0.492287	1.29711	0.011988	0.067069	Gardiquimod
GO:0003007	heart morphogenesis	97	0.479495	1.27437	0.011988	0.067069	Gardiquimod
GO:0019751	polyol metabolic process	75	0.494753	1.29738	0.011988	0.067069	Gardiquimod
GO:0043406	positive regulation of MAP kinase activity	151	0.453282	1.23526	0.011988	0.067069	Gardiquimod
GO:0072332	intrinsic apoptotic signaling pathway by p53 class mediator	66	0.504227	1.31401	0.011988	0.067069	Gardiquimod
GO:0007586	digestion	33	0.569067	1.41982	0.012	0.067069	Gardiquimod
GO:0046470	phosphatidylcholine metabolic process	46	0.542132	1.3888	0.012	0.067069	Gardiquimod
GO:0061014	positive regulation of mRNA catabolic process	41	0.542744	1.3799	0.012	0.067069	Gardiquimod
GO:2000177	regulation of neural precursor cell proliferation	39	0.545551	1.38138	0.012	0.067069	Gardiquimod
GO:0038066	p38MAPK cascade	30	0.584464	1.44625	0.012012	0.067069	Gardiquimod
GO:0032728	positive regulation of interferon-beta production	25	0.614386	1.49382	0.012024	0.067069	Gardiquimod
GO:0046685	response to arsenic-containing substance	26	0.604113	1.47225	0.012024	0.067069	Gardiquimod
GO:0032958	inositol phosphate biosynthetic process	19	0.6439	1.51863	0.0120846	0.0671227	Gardiquimod
GO:0061082	myeloid leukocyte cytokine production	18	0.64932	1.51666	0.0120846	0.0671227	Gardiquimod
GO:1900117	regulation of execution phase of apoptosis	18	0.648583	1.51494	0.0120846	0.0671227	Gardiquimod
GO:0034311	diol metabolic process	16	0.670093	1.54271	0.0121212	0.0672317	Gardiquimod
GO:0006925	inflammatory cell apoptotic process	15	0.685278	1.5698	0.0121581	0.0672474	Gardiquimod
GO:0009110	vitamin biosynthetic process	15	0.686722	1.57311	0.0121581	0.0672474	Gardiquimod
GO:0150077	regulation of neuroinflammatory response	13	0.721481	1.609	0.0122574	0.0677023	Gardiquimod
GO:0017085	response to insecticide	10	0.747304	1.59778	0.0126316	0.0694778	Gardiquimod
GO:0070886	positive regulation of calcineurin-NFAT signaling cascade	10	0.736762	1.57524	0.0126316	0.0694778	Gardiquimod
GO:0106058	positive regulation of calcineurin-mediated signaling	10	0.736762	1.57524	0.0126316	0.0694778	Gardiquimod
GO:0043200	response to amino acid	71	0.498222	1.30241	0.012987	0.0709125	Gardiquimod
GO:0043523	regulation of neuron apoptotic process	114	0.468745	1.25939	0.012987	0.0709125	Gardiquimod
GO:0051223	regulation of protein transport	408	0.411055	1.15497	0.012987	0.0709125	Gardiquimod
GO:0032515	negative regulation of phosphoprotein phosphatase activity	37	0.557672	1.40604	0.013	0.0709125	Gardiquimod
GO:0035308	negative regulation of protein dephosphorylation	42	0.543441	1.3841	0.013	0.0709125	Gardiquimod
GO:0035872	nucleotide-binding domain, leucine rich repeat containing receptor signaling pathway	32	0.569549	1.4177	0.013	0.0709125	Gardiquimod
GO:0035249	synaptic transmission, glutamatergic	25	0.601853	1.46335	0.0130261	0.0709568	Gardiquimod
GO:0010518	positive regulation of phospholipase activity	21	0.625849	1.49217	0.0130522	0.0710014	Gardiquimod
GO:0032770	positive regulation of monooxygenase activity	15	0.681333	1.56077	0.0131712	0.0714523	Gardiquimod
GO:0046475	glycerophospholipid catabolic process	15	0.679657	1.55693	0.0131712	0.0714523	Gardiquimod
GO:0034114	regulation of heterotypic cell-cell adhesion	13	0.720463	1.60673	0.0132789	0.0718391	Gardiquimod
GO:0051000	positive regulation of nitric-oxide synthase activity	13	0.718402	1.60214	0.0132789	0.0718391	Gardiquimod
GO:0000302	response to reactive oxygen species	148	0.452159	1.23116	0.013986	0.0746924	Gardiquimod
GO:0002456	T cell mediated immunity	58	0.511735	1.32733	0.013986	0.0746924	Gardiquimod
GO:0008284	positive regulation of cell proliferation	432	0.407583	1.14677	0.013986	0.0746924	Gardiquimod
GO:0050864	regulation of B cell activation	84	0.485903	1.28018	0.013986	0.0746924	Gardiquimod
GO:0050877	nervous system process	334	0.414386	1.1594	0.013986	0.0746924	Gardiquimod
GO:0070201	regulation of establishment of protein localization	451	0.403483	1.13666	0.013986	0.0746924	Gardiquimod
GO:1901652	response to peptide	306	0.420243	1.17135	0.013986	0.0746924	Gardiquimod
GO:1903670	regulation of sprouting angiogenesis	36	0.556578	1.39797	0.013986	0.0746924	Gardiquimod
GO:0042130	negative regulation of T cell proliferation	31	0.577045	1.43149	0.014	0.0746924	Gardiquimod
GO:0090503	RNA phosphodiester bond hydrolysis, exonucleolytic	41	0.539761	1.37232	0.014	0.0746924	Gardiquimod
GO:2001023	regulation of response to drug	30	0.582677	1.44183	0.014014	0.0746924	Gardiquimod
GO:0001783	B cell apoptotic process	19	0.634903	1.49741	0.0140987	0.0750425	Gardiquimod
GO:0002407	dendritic cell chemotaxis	14	0.693712	1.56505	0.0142857	0.0758339	Gardiquimod
GO:0002828	regulation of type 2 immune response	14	0.696896	1.57224	0.0142857	0.0758339	Gardiquimod
GO:0072643	interferon-gamma secretion	12	0.719499	1.58247	0.014433	0.0764105	Gardiquimod
GO:1901739	regulation of myoblast fusion	12	0.719442	1.58235	0.014433	0.0764105	Gardiquimod
GO:0007250	activation of NF-kappaB-inducing kinase activity	11	0.724894	1.57824	0.0145985	0.0767731	Gardiquimod
GO:0032717	negative regulation of interleukin-8 production	11	0.724983	1.57844	0.0145985	0.0767731	Gardiquimod
GO:0050901	leukocyte tethering or rolling	11	0.72764	1.58422	0.0145985	0.0767731	Gardiquimod
GO:0070242	thymocyte apoptotic process	11	0.724561	1.57752	0.0145985	0.0767731	Gardiquimod
GO:0071425	hematopoietic stem cell proliferation	11	0.726172	1.58103	0.0145985	0.0767731	Gardiquimod
GO:1900044	regulation of protein K63-linked ubiquitination	10	0.734382	1.57015	0.0147368	0.0773975	Gardiquimod
GO:0001935	endothelial cell proliferation	63	0.502517	1.30787	0.014985	0.078054	Gardiquimod
GO:0003158	endothelium development	59	0.503633	1.30613	0.014985	0.078054	Gardiquimod
GO:0006022	aminoglycan metabolic process	75	0.489429	1.28342	0.014985	0.078054	Gardiquimod
GO:0051480	regulation of cytosolic calcium ion concentration	138	0.453459	1.23231	0.014985	0.078054	Gardiquimod
GO:0001892	embryonic placenta development	45	0.536295	1.37213	0.015	0.078054	Gardiquimod
GO:0033627	cell adhesion mediated by integrin	34	0.562135	1.40847	0.015	0.078054	Gardiquimod
GO:0042446	hormone biosynthetic process	34	0.561926	1.40794	0.015	0.078054	Gardiquimod
GO:0039529	RIG-I signaling pathway	18	0.637894	1.48997	0.0151057	0.0782952	Gardiquimod
GO:0046621	negative regulation of organ growth	19	0.631012	1.48824	0.0151057	0.0782952	Gardiquimod
GO:1903672	positive regulation of sprouting angiogenesis	19	0.631037	1.48829	0.0151057	0.0782952	Gardiquimod
GO:0001919	regulation of receptor recycling	16	0.66311	1.52664	0.0151515	0.078304	Gardiquimod
GO:0036336	dendritic cell migration	16	0.663213	1.52687	0.0151515	0.078304	Gardiquimod
GO:0002724	regulation of T cell cytokine production	17	0.647149	1.49667	0.0151668	0.078304	Gardiquimod
GO:0003159	morphogenesis of an endothelium	13	0.699967	1.56103	0.0153218	0.0783875	Gardiquimod
GO:0030889	negative regulation of B cell proliferation	13	0.705173	1.57264	0.0153218	0.0783875	Gardiquimod
GO:0035458	cellular response to interferon-beta	13	0.712076	1.58803	0.0153218	0.0783875	Gardiquimod
GO:0045655	regulation of monocyte differentiation	13	0.71354	1.59129	0.0153218	0.0783875	Gardiquimod
GO:0045672	positive regulation of osteoclast differentiation	13	0.705536	1.57344	0.0153218	0.0783875	Gardiquimod
GO:0061154	endothelial tube morphogenesis	13	0.699967	1.56103	0.0153218	0.0783875	Gardiquimod
GO:1901223	negative regulation of NIK/NF-kappaB signaling	13	0.697619	1.55579	0.0153218	0.0783875	Gardiquimod
GO:0006909	phagocytosis	157	0.444844	1.2136	0.015984	0.0808486	Gardiquimod
GO:0061138	morphogenesis of a branching epithelium	73	0.492159	1.28787	0.015984	0.0808486	Gardiquimod
GO:0090087	regulation of peptide transport	420	0.40693	1.14442	0.015984	0.0808486	Gardiquimod
GO:0031294	lymphocyte costimulation	39	0.541226	1.37043	0.016	0.0808486	Gardiquimod
GO:0055123	digestive system development	48	0.529108	1.35883	0.016	0.0808486	Gardiquimod
GO:0071230	cellular response to amino acid stimulus	44	0.534718	1.36594	0.016	0.0808486	Gardiquimod
GO:0010517	regulation of phospholipase activity	26	0.590411	1.43886	0.0160321	0.0808486	Gardiquimod
GO:0043029	T cell homeostasis	27	0.589854	1.44539	0.0160321	0.0808486	Gardiquimod
GO:0032731	positive regulation of interleukin-1 beta production	28	0.589722	1.44899	0.0160481	0.0808486	Gardiquimod
GO:0033173	calcineurin-NFAT signaling cascade	28	0.584007	1.43495	0.0160481	0.0808486	Gardiquimod
GO:0051148	negative regulation of muscle cell differentiation	28	0.581032	1.42763	0.0160481	0.0808486	Gardiquimod
GO:0097720	calcineurin-mediated signaling	28	0.584007	1.43495	0.0160481	0.0808486	Gardiquimod
GO:0045601	regulation of endothelial cell differentiation	16	0.659571	1.51849	0.0161616	0.0812134	Gardiquimod
GO:0045933	positive regulation of muscle contraction	16	0.651569	1.50007	0.0161616	0.0812134	Gardiquimod
GO:0002902	regulation of B cell apoptotic process	14	0.688922	1.55425	0.0163265	0.081814	Gardiquimod
GO:0060142	regulation of syncytium formation by plasma membrane fusion	13	0.69575	1.55162	0.0163432	0.081814	Gardiquimod
GO:0060669	embryonic placenta morphogenesis	13	0.692132	1.54355	0.0163432	0.081814	Gardiquimod
GO:0032692	negative regulation of interleukin-1 production	12	0.717739	1.5786	0.0164948	0.0821571	Gardiquimod
GO:0032695	negative regulation of interleukin-12 production	12	0.704896	1.55036	0.0164948	0.0821571	Gardiquimod
GO:0032753	positive regulation of interleukin-4 production	12	0.711025	1.56384	0.0164948	0.0821571	Gardiquimod
GO:0050862	positive regulation of T cell receptor signaling pathway	12	0.713794	1.56993	0.0164948	0.0821571	Gardiquimod
GO:0007218	neuropeptide signaling pathway	10	0.727527	1.5555	0.0168421	0.083676	Gardiquimod
GO:0044060	regulation of endocrine process	10	0.731272	1.5635	0.0168421	0.083676	Gardiquimod
GO:0001505	regulation of neurotransmitter levels	155	0.442949	1.20815	0.016983	0.0839332	Gardiquimod
GO:0002429	immune response-activating cell surface receptor signaling pathway	253	0.424307	1.17659	0.016983	0.0839332	Gardiquimod
GO:0008637	apoptotic mitochondrial changes	97	0.474714	1.26166	0.016983	0.0839332	Gardiquimod
GO:0035690	cellular response to drug	217	0.427471	1.17848	0.016983	0.0839332	Gardiquimod
GO:0006970	response to osmotic stress	48	0.523003	1.34315	0.017	0.0839332	Gardiquimod
GO:0097756	negative regulation of blood vessel diameter	24	0.59839	1.44718	0.0170512	0.0839761	Gardiquimod
GO:1900744	regulation of p38MAPK cascade	24	0.602066	1.45608	0.0170512	0.0839761	Gardiquimod
GO:1905953	negative regulation of lipid localization	19	0.619456	1.46098	0.0171198	0.0842095	Gardiquimod
GO:0048546	digestive tract morphogenesis	17	0.642954	1.48697	0.0171891	0.0844451	Gardiquimod
GO:0048009	insulin-like growth factor receptor signaling pathway	13	0.690705	1.54037	0.0173647	0.0852018	Gardiquimod
GO:0060149	negative regulation of posttranscriptional gene silencing	12	0.698273	1.53579	0.0175258	0.0857795	Gardiquimod
GO:0060967	negative regulation of gene silencing by RNA	12	0.698273	1.53579	0.0175258	0.0857795	Gardiquimod
GO:0001709	cell fate determination	10	0.722368	1.54447	0.0178947	0.0873691	Gardiquimod
GO:0070989	oxidative demethylation	10	0.722118	1.54393	0.0178947	0.0873691	Gardiquimod
GO:0051100	negative regulation of binding	112	0.461773	1.23968	0.017982	0.0875872	Gardiquimod
GO:0010771	negative regulation of cell morphogenesis involved in differentiation	39	0.537575	1.36118	0.018	0.0875872	Gardiquimod
GO:0050818	regulation of coagulation	23	0.602882	1.45187	0.0180361	0.0875872	Gardiquimod
GO:0051567	histone H3-K9 methylation	28	0.574808	1.41234	0.0180542	0.0875872	Gardiquimod
GO:0030193	regulation of blood coagulation	22	0.607684	1.45549	0.0180723	0.0875872	Gardiquimod
GO:1900046	regulation of hemostasis	22	0.607684	1.45549	0.0180723	0.0875872	Gardiquimod
GO:0001975	response to amphetamine	16	0.650621	1.49788	0.0181818	0.0880102	Gardiquimod
GO:0042036	negative regulation of cytokine biosynthetic process	14	0.675078	1.52302	0.0183673	0.0887817	Gardiquimod
GO:0071801	regulation of podosome assembly	13	0.680831	1.51835	0.0183861	0.0887817	Gardiquimod
GO:0071732	cellular response to nitric oxide	11	0.70892	1.54347	0.0187696	0.0905227	Gardiquimod
GO:1903792	negative regulation of anion transport	10	0.72073	1.54096	0.0189474	0.0905843	Gardiquimod
GO:0008643	carbohydrate transport	79	0.477823	1.25615	0.018981	0.0905843	Gardiquimod
GO:0009612	response to mechanical stimulus	96	0.477423	1.26805	0.018981	0.0905843	Gardiquimod
GO:0048589	developmental growth	318	0.415012	1.1587	0.018981	0.0905843	Gardiquimod
GO:0022600	digestive system process	31	0.562465	1.39532	0.019	0.0905843	Gardiquimod
GO:0035150	regulation of tube size	46	0.523508	1.34109	0.019	0.0905843	Gardiquimod
GO:0035296	regulation of tube diameter	46	0.523508	1.34109	0.019	0.0905843	Gardiquimod
GO:0050880	regulation of blood vessel size	46	0.523508	1.34109	0.019	0.0905843	Gardiquimod
GO:0097746	regulation of blood vessel diameter	46	0.523508	1.34109	0.019	0.0905843	Gardiquimod
GO:0002711	positive regulation of T cell mediated immunity	26	0.584553	1.42459	0.0190381	0.0905843	Gardiquimod
GO:1903035	negative regulation of response to wounding	29	0.567445	1.3999	0.0190381	0.0905843	Gardiquimod
GO:0097035	regulation of membrane lipid distribution	28	0.572988	1.40787	0.0190572	0.0905843	Gardiquimod
GO:0001773	myeloid dendritic cell activation	17	0.63601	1.47091	0.0192113	0.0907386	Gardiquimod
GO:0036314	response to sterol	17	0.635884	1.47062	0.0192113	0.0907386	Gardiquimod
GO:0043650	dicarboxylic acid biosynthetic process	10	-0.445633	-1.39955	0.0192308	0.0907386	Gardiquimod
GO:1903332	regulation of protein folding	10	-0.454149	-1.4263	0.0192308	0.0907386	Gardiquimod
GO:0010863	positive regulation of phospholipase C activity	15	0.664368	1.5219	0.0192503	0.0907386	Gardiquimod
GO:0042226	interleukin-6 biosynthetic process	15	0.661107	1.51443	0.0192503	0.0907386	Gardiquimod
GO:0061844	antimicrobial humoral immune response mediated by antimicrobial peptide	15	0.659488	1.51072	0.0192503	0.0907386	Gardiquimod
GO:0034312	diol biosynthetic process	14	0.671506	1.51495	0.0193878	0.0911694	Gardiquimod
GO:1902170	cellular response to reactive nitrogen species	14	0.669309	1.51	0.0193878	0.0911694	Gardiquimod
GO:0015850	organic hydroxy compound transport	87	0.479897	1.26823	0.01998	0.0935694	Gardiquimod
GO:0046488	phosphatidylinositol metabolic process	125	0.448853	1.21324	0.01998	0.0935694	Gardiquimod
GO:0045822	negative regulation of heart contraction	10	0.717935	1.53499	0.02	0.0935694	Gardiquimod
GO:0051057	positive regulation of small GTPase mediated signal transduction	39	0.535251	1.3553	0.02	0.0935694	Gardiquimod
GO:0072028	nephron morphogenesis	27	0.576292	1.41216	0.0200401	0.0935694	Gardiquimod
GO:0072088	nephron epithelium morphogenesis	27	0.576292	1.41216	0.0200401	0.0935694	Gardiquimod
GO:0030514	negative regulation of BMP signaling pathway	21	0.61125	1.45736	0.0200803	0.0936467	Gardiquimod
GO:0015844	monoamine transport	18	0.626386	1.46309	0.020141	0.0937086	Gardiquimod
GO:0051154	negative regulation of striated muscle cell differentiation	18	0.626847	1.46417	0.020141	0.0937086	Gardiquimod
GO:0001937	negative regulation of endothelial cell proliferation	15	0.656659	1.50424	0.0202634	0.0941675	Gardiquimod
GO:0045408	regulation of interleukin-6 biosynthetic process	14	0.663484	1.49686	0.0204082	0.0947144	Gardiquimod
GO:0032660	regulation of interleukin-17 production	13	0.674091	1.50332	0.020429	0.0947144	Gardiquimod
GO:0006691	leukotriene metabolic process	11	0.700787	1.52576	0.0208551	0.0962383	Gardiquimod
GO:0045410	positive regulation of interleukin-6 biosynthetic process	11	0.69831	1.52037	0.0208551	0.0962383	Gardiquimod
GO:0051589	negative regulation of neurotransmitter transport	11	0.699529	1.52302	0.0208551	0.0962383	Gardiquimod
GO:0070431	nucleotide-binding oligomerization domain containing 2 signaling pathway	11	0.700151	1.52437	0.0208551	0.0962383	Gardiquimod
GO:0042113	B cell activation	164	0.437706	1.19536	0.020979	0.0966816	Gardiquimod
GO:0002709	regulation of T cell mediated immunity	38	0.537563	1.35798	0.021	0.0966816	Gardiquimod
GO:0002691	regulation of cellular extravasation	14	0.662334	1.49426	0.0214286	0.09854	Gardiquimod
GO:0002040	sprouting angiogenesis	53	0.509501	1.31882	0.021978	0.100599	Gardiquimod
GO:0048562	embryonic organ morphogenesis	105	0.464372	1.2402	0.021978	0.100599	Gardiquimod
GO:0051056	regulation of small GTPase mediated signal transduction	199	0.426924	1.1736	0.021978	0.100599	Gardiquimod
GO:1903034	regulation of response to wounding	60	0.50002	1.29815	0.021978	0.100599	Gardiquimod
GO:0007585	respiratory gaseous exchange	24	0.590913	1.4291	0.0220662	0.100754	Gardiquimod
GO:0010586	miRNA metabolic process	28	0.568867	1.39774	0.0220662	0.100754	Gardiquimod
GO:0050918	positive chemotaxis	21	0.606015	1.44488	0.0220884	0.100754	Gardiquimod
GO:0048536	spleen development	18	0.622383	1.45374	0.0221551	0.100942	Gardiquimod
GO:0019229	regulation of vasoconstriction	16	0.643157	1.4807	0.0222222	0.101131	Gardiquimod
GO:0003044	regulation of systemic arterial blood pressure mediated by a chemical signal	12	0.680062	1.49574	0.0226804	0.102861	Gardiquimod
GO:0014002	astrocyte development	12	0.677194	1.48943	0.0226804	0.102861	Gardiquimod
GO:0060045	positive regulation of cardiac muscle cell proliferation	12	0.685819	1.5084	0.0226804	0.102861	Gardiquimod
GO:0002467	germinal center formation	11	0.693078	1.50898	0.0229406	0.10362	Gardiquimod
GO:0006644	phospholipid metabolic process	284	0.4179	1.16229	0.022977	0.10362	Gardiquimod
GO:0043525	positive regulation of neuron apoptotic process	40	0.532576	1.35131	0.023	0.10362	Gardiquimod
GO:0060419	heart growth	45	0.519612	1.32945	0.023	0.10362	Gardiquimod
GO:0071384	cellular response to corticosteroid stimulus	34	0.550435	1.37915	0.023	0.10362	Gardiquimod
GO:0090200	positive regulation of release of cytochrome c from mitochondria	26	0.575409	1.4023	0.0230461	0.10362	Gardiquimod
GO:0006940	regulation of smooth muscle contraction	22	0.599368	1.43558	0.0230924	0.10362	Gardiquimod
GO:0036475	neuron death in response to oxidative stress	22	0.601914	1.44167	0.0230924	0.10362	Gardiquimod
GO:1903203	regulation of oxidative stress-induced neuron death	22	0.601914	1.44167	0.0230924	0.10362	Gardiquimod
GO:0042462	eye photoreceptor cell development	10	0.713092	1.52463	0.0231579	0.10362	Gardiquimod
GO:0000305	response to oxygen radical	18	0.619583	1.4472	0.0231621	0.10362	Gardiquimod
GO:1902003	regulation of amyloid-beta formation	18	0.619862	1.44785	0.0231621	0.10362	Gardiquimod
GO:0009113	purine nucleobase biosynthetic process	11	-0.648212	-2.10489	0.0232558	0.103804	Gardiquimod
GO:0061003	positive regulation of dendritic spine morphogenesis	11	-0.489749	-1.59032	0.0232558	0.103804	Gardiquimod
GO:1901889	negative regulation of cell junction assembly	13	0.667347	1.48828	0.0234934	0.104746	Gardiquimod
GO:1900407	regulation of cellular response to oxidative stress	55	0.505273	1.30888	0.023976	0.106726	Gardiquimod
GO:0001836	release of cytochrome c from mitochondria	48	0.512606	1.31645	0.024	0.106726	Gardiquimod
GO:0072529	pyrimidine-containing compound catabolic process	30	0.563292	1.39386	0.024024	0.106726	Gardiquimod
GO:0001954	positive regulation of cell-matrix adhesion	28	0.561565	1.3798	0.0240722	0.106726	Gardiquimod
GO:0043954	cellular component maintenance	28	0.559781	1.37542	0.0240722	0.106726	Gardiquimod
GO:0000303	response to superoxide	17	0.627624	1.45151	0.0242669	0.106989	Gardiquimod
GO:0010742	macrophage derived foam cell differentiation	17	0.630561	1.45831	0.0242669	0.106989	Gardiquimod
GO:0071634	regulation of transforming growth factor beta production	17	0.630551	1.45828	0.0242669	0.106989	Gardiquimod
GO:0090077	foam cell differentiation	17	0.630561	1.45831	0.0242669	0.106989	Gardiquimod
GO:1900274	regulation of phospholipase C activity	17	0.625733	1.44714	0.0242669	0.106989	Gardiquimod
GO:0044070	regulation of anion transport	45	0.518715	1.32715	0.025	0.109976	Gardiquimod
GO:0061515	myeloid cell development	46	0.518051	1.32711	0.025	0.109976	Gardiquimod
GO:1903205	regulation of hydrogen peroxide-induced cell death	16	0.630128	1.4507	0.0252525	0.110963	Gardiquimod
GO:0006953	acute-phase response	14	0.653574	1.4745	0.0255102	0.111714	Gardiquimod
GO:0001754	eye photoreceptor cell differentiation	13	0.659469	1.47071	0.0255363	0.111714	Gardiquimod
GO:1900409	positive regulation of cellular response to oxidative stress	13	0.661391	1.47499	0.0255363	0.111714	Gardiquimod
GO:1902884	positive regulation of response to oxidative stress	13	0.661391	1.47499	0.0255363	0.111714	Gardiquimod
GO:0019731	antibacterial humoral response	12	0.672546	1.47921	0.0257732	0.112626	Gardiquimod
GO:0006672	ceramide metabolic process	61	0.496545	1.28877	0.025974	0.112858	Gardiquimod
GO:1901654	response to ketone	96	0.469737	1.24764	0.025974	0.112858	Gardiquimod
GO:0000186	activation of MAPKK activity	40	0.527534	1.33851	0.026	0.112858	Gardiquimod
GO:0001885	endothelial cell development	33	0.549574	1.37119	0.026	0.112858	Gardiquimod
GO:0033273	response to vitamin	46	0.517855	1.32661	0.026	0.112858	Gardiquimod
GO:0043507	positive regulation of JUN kinase activity	50	0.515791	1.32931	0.026	0.112858	Gardiquimod
GO:0070206	protein trimerization	30	0.557688	1.37999	0.026026	0.112858	Gardiquimod
GO:0071549	cellular response to dexamethasone stimulus	14	0.649334	1.46493	0.0265306	0.114911	Gardiquimod
GO:0002577	regulation of antigen processing and presentation	13	0.6586	1.46877	0.0265577	0.114911	Gardiquimod
GO:0032355	response to estradiol	65	0.492904	1.2839	0.026973	0.116316	Gardiquimod
GO:0043506	regulation of JUN kinase activity	59	0.494402	1.28219	0.026973	0.116316	Gardiquimod
GO:0097164	ammonium ion metabolic process	104	0.460226	1.22821	0.026973	0.116316	Gardiquimod
GO:0042771	intrinsic apoptotic signaling pathway in response to DNA damage by p53 class mediator	42	0.523745	1.33394	0.027	0.116316	Gardiquimod
GO:0019048	modulation by virus of host morphology or physiology	29	0.557694	1.37585	0.0270541	0.116422	Gardiquimod
GO:0001990	regulation of systemic arterial blood pressure by hormone	10	0.705881	1.50922	0.0273684	0.117647	Gardiquimod
GO:0001755	neural crest cell migration	13	0.656586	1.46428	0.0275792	0.118424	Gardiquimod
GO:0002377	immunoglobulin production	80	0.474435	1.2483	0.027972	0.119297	Gardiquimod
GO:0007507	heart development	271	0.416165	1.15629	0.027972	0.119297	Gardiquimod
GO:0022612	gland morphogenesis	54	0.500803	1.29738	0.027972	0.119297	Gardiquimod
GO:0031400	negative regulation of protein modification process	396	0.402134	1.12967	0.027972	0.119297	Gardiquimod
GO:0046546	development of primary male sexual characteristics	67	0.492314	1.28258	0.027972	0.119297	Gardiquimod
GO:0051353	positive regulation of oxidoreductase activity	33	0.547914	1.36705	0.028	0.119297	Gardiquimod
GO:0002448	mast cell mediated immunity	30	0.555497	1.37457	0.028028	0.119297	Gardiquimod
GO:0042472	inner ear morphogenesis	26	0.567737	1.3836	0.0280561	0.119297	Gardiquimod
GO:2000008	regulation of protein localization to cell surface	23	0.590626	1.42235	0.0280561	0.119297	Gardiquimod
GO:0032835	glomerulus development	24	0.583914	1.41218	0.0280843	0.119297	Gardiquimod
GO:0055026	negative regulation of cardiac muscle tissue development	15	0.632448	1.44878	0.0283688	0.120377	Gardiquimod
GO:0071305	cellular response to vitamin D	10	0.699345	1.49524	0.0284211	0.120469	Gardiquimod
GO:0046500	S-adenosylmethionine metabolic process	14	0.641274	1.44675	0.0285714	0.120977	Gardiquimod
GO:0001776	leukocyte homeostasis	59	0.493449	1.27972	0.028971	0.12226	Gardiquimod
GO:0045834	positive regulation of lipid metabolic process	71	0.483716	1.26449	0.028971	0.12226	Gardiquimod
GO:0046782	regulation of viral transcription	57	0.498048	1.2907	0.028971	0.12226	Gardiquimod
GO:0009798	axis specification	33	0.546679	1.36396	0.029	0.12226	Gardiquimod
GO:0110110	positive regulation of animal organ morphogenesis	30	0.5539	1.37062	0.029029	0.12226	Gardiquimod
GO:0046627	negative regulation of insulin receptor signaling pathway	20	0.600456	1.42369	0.0291165	0.122498	Gardiquimod
GO:0043032	positive regulation of macrophage activation	11	0.679826	1.48012	0.0291971	0.122706	Gardiquimod
GO:0032620	interleukin-17 production	16	0.627866	1.4455	0.0292929	0.122979	Gardiquimod
GO:0016082	synaptic vesicle priming	10	0.69825	1.4929	0.0294737	0.123606	Gardiquimod
GO:0003013	circulatory system process	190	0.425443	1.16837	0.02997	0.124886	Gardiquimod
GO:0008015	blood circulation	184	0.428881	1.17602	0.02997	0.124886	Gardiquimod
GO:0010634	positive regulation of epithelial cell migration	81	0.473043	1.24641	0.02997	0.124886	Gardiquimod
GO:0045995	regulation of embryonic development	59	0.493009	1.27857	0.02997	0.124886	Gardiquimod
GO:0050806	positive regulation of synaptic transmission	56	0.498139	1.29077	0.02997	0.124886	Gardiquimod
GO:1901216	positive regulation of neuron death	65	0.488635	1.27278	0.02997	0.124886	Gardiquimod
GO:0001570	vasculogenesis	38	0.523031	1.32127	0.03	0.124886	Gardiquimod
GO:0045668	negative regulation of osteoblast differentiation	22	0.592414	1.41892	0.0301205	0.125256	Gardiquimod
GO:0051966	regulation of synaptic transmission, glutamatergic	16	0.627173	1.4439	0.030303	0.125619	Gardiquimod
GO:0071450	cellular response to oxygen radical	16	0.626583	1.44254	0.030303	0.125619	Gardiquimod
GO:0071451	cellular response to superoxide	16	0.626583	1.44254	0.030303	0.125619	Gardiquimod
GO:0055094	response to lipoprotein particle	15	0.629373	1.44174	0.0303951	0.125869	Gardiquimod
GO:0035994	response to muscle stretch	10	0.695987	1.48806	0.0305263	0.12628	Gardiquimod
GO:0008217	regulation of blood pressure	59	0.492763	1.27794	0.030969	0.127972	Gardiquimod
GO:0002763	positive regulation of myeloid leukocyte differentiation	31	0.547985	1.3594	0.031	0.127972	Gardiquimod
GO:2000243	positive regulation of reproductive process	27	0.561052	1.37481	0.0310621	0.128094	Gardiquimod
GO:0043277	apoptotic cell clearance	16	0.626346	1.442	0.0313131	0.128995	Gardiquimod
GO:0006775	fat-soluble vitamin metabolic process	14	0.636654	1.43633	0.0316327	0.130176	Gardiquimod
GO:0097202	activation of cysteine-type endopeptidase activity	12	0.665797	1.46436	0.0319588	0.131006	Gardiquimod
GO:0010469	regulation of signaling receptor activity	54	0.49707	1.2877	0.031968	0.131006	Gardiquimod
GO:0006023	aminoglycan biosynthetic process	50	0.507439	1.30779	0.032	0.131006	Gardiquimod
GO:0006024	glycosaminoglycan biosynthetic process	50	0.507439	1.30779	0.032	0.131006	Gardiquimod
GO:0051591	response to cAMP	42	0.515221	1.31223	0.032	0.131006	Gardiquimod
GO:0034142	toll-like receptor 4 signaling pathway	20	0.597338	1.4163	0.0321285	0.131125	Gardiquimod
GO:1904645	response to amyloid-beta	22	0.584711	1.40047	0.0321285	0.131125	Gardiquimod
GO:1904646	cellular response to amyloid-beta	22	0.584711	1.40047	0.0321285	0.131125	Gardiquimod
GO:0032691	negative regulation of interleukin-1 beta production	11	0.674439	1.46839	0.0323253	0.131792	Gardiquimod
GO:1903523	negative regulation of blood circulation	15	0.627187	1.43673	0.0324215	0.132048	Gardiquimod
GO:0032147	activation of protein kinase activity	194	0.423971	1.16445	0.032967	0.133846	Gardiquimod
GO:0046324	regulation of glucose import	32	0.547432	1.36264	0.033	0.133846	Gardiquimod
GO:0046620	regulation of organ growth	50	0.503653	1.29803	0.033	0.133846	Gardiquimod
GO:0055017	cardiac muscle tissue growth	44	0.511358	1.30627	0.033	0.133846	Gardiquimod
GO:0002833	positive regulation of response to biotic stimulus	27	0.560113	1.37251	0.0330661	0.133846	Gardiquimod
GO:0030500	regulation of bone mineralization	27	0.559387	1.37073	0.0330661	0.133846	Gardiquimod
GO:1900745	positive regulation of p38MAPK cascade	15	0.6245	1.43057	0.0334347	0.1352	Gardiquimod
GO:0035272	exocrine system development	14	0.634595	1.43168	0.0336735	0.135749	Gardiquimod
GO:0043249	erythrocyte maturation	10	0.69094	1.47727	0.0336842	0.135749	Gardiquimod
GO:0055022	negative regulation of cardiac muscle tissue growth	13	0.646307	1.44135	0.0337079	0.135749	Gardiquimod
GO:0061117	negative regulation of heart growth	13	0.646307	1.44135	0.0337079	0.135749	Gardiquimod
GO:0001933	negative regulation of protein phosphorylation	261	0.415361	1.15322	0.033966	0.136647	Gardiquimod
GO:0021782	glial cell development	49	0.506251	1.30323	0.034	0.136647	Gardiquimod
GO:0080111	DNA demethylation	21	0.594003	1.41624	0.0341365	0.137057	Gardiquimod
GO:2001038	regulation of cellular response to drug	18	0.612253	1.43008	0.0342397	0.137332	Gardiquimod
GO:0051402	neuron apoptotic process	133	0.437923	1.18919	0.034965	0.140097	Gardiquimod
GO:0045824	negative regulation of innate immune response	37	0.523416	1.31967	0.035	0.140097	Gardiquimod
GO:0002009	morphogenesis of an epithelium	271	0.411908	1.14446	0.035964	0.143375	Gardiquimod
GO:0019932	second-messenger-mediated signaling	152	0.435377	1.18641	0.035964	0.143375	Gardiquimod
GO:0048592	eye morphogenesis	55	0.490321	1.27014	0.035964	0.143375	Gardiquimod
GO:0050732	negative regulation of peptidyl-tyrosine phosphorylation	35	0.534117	1.33928	0.035964	0.143375	Gardiquimod
GO:0002762	negative regulation of myeloid leukocyte differentiation	25	0.565965	1.37609	0.0360721	0.143558	Gardiquimod
GO:0032793	positive regulation of CREB transcription factor activity	12	0.659415	1.45033	0.0360825	0.143558	Gardiquimod
GO:0055023	positive regulation of cardiac muscle tissue growth	18	0.610678	1.4264	0.0362538	0.144095	Gardiquimod
GO:0007256	activation of JNKK activity	10	0.687261	1.46941	0.0368421	0.146286	Gardiquimod
GO:0008584	male gonad development	66	0.482081	1.2563	0.036963	0.146325	Gardiquimod
GO:0072593	reactive oxygen species metabolic process	148	0.436288	1.18794	0.036963	0.146325	Gardiquimod
GO:0097193	intrinsic apoptotic signaling pathway	235	0.414122	1.14553	0.036963	0.146325	Gardiquimod
GO:0045638	negative regulation of myeloid cell differentiation	48	0.505905	1.29924	0.037	0.146325	Gardiquimod
GO:0001921	positive regulation of receptor recycling	11	0.664073	1.44582	0.0375391	0.148309	Gardiquimod
GO:0001780	neutrophil homeostasis	10	0.680215	1.45434	0.0378947	0.149234	Gardiquimod
GO:0010977	negative regulation of neuron projection development	66	0.481516	1.25482	0.037962	0.149234	Gardiquimod
GO:0051346	negative regulation of hydrolase activity	217	0.418684	1.15425	0.037962	0.149234	Gardiquimod
GO:0061061	muscle structure development	298	0.410593	1.14365	0.037962	0.149234	Gardiquimod
GO:1901699	cellular response to nitrogen compound	376	0.399444	1.12126	0.037962	0.149234	Gardiquimod
GO:1900077	negative regulation of cellular response to insulin stimulus	21	0.588377	1.40283	0.0381526	0.149835	Gardiquimod
GO:0071548	response to dexamethasone	19	0.599925	1.41492	0.0382679	0.149989	Gardiquimod
GO:0097242	amyloid-beta clearance	19	0.600339	1.41589	0.0382679	0.149989	Gardiquimod
GO:0009265	2'-deoxyribonucleotide biosynthetic process	10	0.677966	1.44953	0.0389474	0.15205	Gardiquimod
GO:0010714	positive regulation of collagen metabolic process	10	0.678498	1.45067	0.0389474	0.15205	Gardiquimod
GO:0030325	adrenal gland development	10	0.678551	1.45078	0.0389474	0.15205	Gardiquimod
GO:0046385	deoxyribose phosphate biosynthetic process	10	0.677966	1.44953	0.0389474	0.15205	Gardiquimod
GO:0001938	positive regulation of endothelial cell proliferation	42	0.509945	1.29879	0.039	0.152105	Gardiquimod
GO:0001881	receptor recycling	23	0.575925	1.38695	0.0390782	0.15211	Gardiquimod
GO:0072078	nephron tubule morphogenesis	26	0.559303	1.36305	0.0390782	0.15211	Gardiquimod
GO:0034123	positive regulation of toll-like receptor signaling pathway	14	0.62903	1.41913	0.0397959	0.154752	Gardiquimod
GO:0042063	gliogenesis	138	0.434573	1.18099	0.03996	0.154933	Gardiquimod
GO:0042102	positive regulation of T cell proliferation	53	0.492225	1.2741	0.03996	0.154933	Gardiquimod
GO:0048872	homeostasis of number of cells	171	0.426681	1.16675	0.03996	0.154933	Gardiquimod
GO:0002704	negative regulation of leukocyte mediated immunity	28	0.54688	1.34372	0.0401204	0.155278	Gardiquimod
GO:0010939	regulation of necrotic cell death	20	0.586703	1.39108	0.0401606	0.155278	Gardiquimod
GO:0010743	regulation of macrophage derived foam cell differentiation	12	0.65182	1.43362	0.0402062	0.155278	Gardiquimod
GO:0045494	photoreceptor cell maintenance	12	0.650398	1.43049	0.0402062	0.155278	Gardiquimod
GO:0050829	defense response to Gram-negative bacterium	16	0.617947	1.42266	0.040404	0.15589	Gardiquimod
GO:0060425	lung morphogenesis	17	0.610792	1.41259	0.0404449	0.155896	Gardiquimod
GO:0009651	response to salt stress	15	0.618935	1.41783	0.0405268	0.156059	Gardiquimod
GO:0040014	regulation of multicellular organism growth	38	0.514842	1.30058	0.041	0.157728	Gardiquimod
GO:0072091	regulation of stem cell proliferation	27	0.550955	1.35007	0.0410822	0.15789	Gardiquimod
GO:0060038	cardiac muscle cell proliferation	24	0.569922	1.37834	0.0411234	0.157895	Gardiquimod
GO:0097028	dendritic cell differentiation	22	0.576563	1.38095	0.0411647	0.1579	Gardiquimod
GO:0051963	regulation of synapse assembly	19	0.595383	1.40421	0.041289	0.157918	Gardiquimod
GO:0060330	regulation of response to interferon-gamma	19	0.594748	1.40271	0.041289	0.157918	Gardiquimod
GO:0060334	regulation of interferon-gamma-mediated signaling pathway	19	0.594748	1.40271	0.041289	0.157918	Gardiquimod
GO:0007606	sensory perception of chemical stimulus	13	0.630865	1.40692	0.0418795	0.160022	Gardiquimod
GO:0046486	glycerolipid metabolic process	266	0.410854	1.14107	0.041958	0.160167	Gardiquimod
GO:0045600	positive regulation of fat cell differentiation	29	0.544799	1.34404	0.0420842	0.160494	Gardiquimod
GO:0034661	ncRNA catabolic process	28	0.544639	1.33821	0.0421264	0.1605	Gardiquimod
GO:0034614	cellular response to reactive oxygen species	108	0.450496	1.20537	0.042957	0.163507	Gardiquimod
GO:0002260	lymphocyte homeostasis	47	0.50274	1.28842	0.043	0.163513	Gardiquimod
GO:0007189	adenylate cyclase-activating G protein-coupled receptor signaling pathway	24	0.568095	1.37392	0.0431294	0.16369	Gardiquimod
GO:0034205	amyloid-beta formation	24	0.569337	1.37692	0.0431294	0.16369	Gardiquimod
GO:0010888	negative regulation of lipid storage	12	0.647624	1.42439	0.043299	0.164176	Gardiquimod
GO:0043248	proteasome assembly	13	-0.414661	-1.42568	0.0434783	0.164698	Gardiquimod
GO:0060544	regulation of necroptotic process	14	0.625763	1.41176	0.0438776	0.165715	Gardiquimod
GO:0010595	positive regulation of endothelial cell migration	55	0.485868	1.25861	0.043956	0.165715	Gardiquimod
GO:0015749	monosaccharide transmembrane transport	57	0.482874	1.25138	0.043956	0.165715	Gardiquimod
GO:0060284	regulation of cell development	450	0.392105	1.10443	0.043956	0.165715	Gardiquimod
GO:0097327	response to antineoplastic agent	64	0.477316	1.24253	0.043956	0.165715	Gardiquimod
GO:0061333	renal tubule morphogenesis	28	0.544074	1.33683	0.0441324	0.166221	Gardiquimod
GO:1904668	positive regulation of ubiquitin protein ligase activity	10	0.672176	1.43715	0.0442105	0.166357	Gardiquimod
GO:0009880	embryonic pattern specification	18	0.60158	1.40515	0.0443102	0.166573	Gardiquimod
GO:1902532	negative regulation of intracellular signal transduction	344	0.401494	1.12447	0.044955	0.168837	Gardiquimod
GO:0034110	regulation of homotypic cell-cell adhesion	10	0.67124	1.43515	0.0452632	0.169833	Gardiquimod
GO:0040018	positive regulation of multicellular organism growth	12	0.644308	1.4171	0.0453608	0.169877	Gardiquimod
GO:0071295	cellular response to vitamin	12	0.643674	1.4157	0.0453608	0.169877	Gardiquimod
GO:0034975	protein folding in endoplasmic reticulum	14	-0.391817	-1.39995	0.0454545	0.169906	Gardiquimod
GO:0071800	podosome assembly	16	0.610902	1.40644	0.0454545	0.169906	Gardiquimod
GO:0006937	regulation of muscle contraction	63	0.480114	1.24956	0.045954	0.171288	Gardiquimod
GO:0035264	multicellular organism growth	89	0.458725	1.21376	0.045954	0.171288	Gardiquimod
GO:2001234	negative regulation of apoptotic signaling pathway	149	0.432182	1.17688	0.045954	0.171288	Gardiquimod
GO:0060420	regulation of heart growth	33	0.531991	1.32732	0.046	0.171297	Gardiquimod
GO:0061045	negative regulation of wound healing	24	0.563247	1.36219	0.0461384	0.171651	Gardiquimod
GO:0014075	response to amine	22	0.571959	1.36993	0.0461847	0.171662	Gardiquimod
GO:0044827	modulation by host of viral genome replication	10	0.670125	1.43277	0.0463158	0.171826	Gardiquimod
GO:0046519	sphingoid metabolic process	10	0.670922	1.43447	0.0463158	0.171826	Gardiquimod
GO:0003006	developmental process involved in reproduction	299	0.406982	1.13367	0.046953	0.173551	Gardiquimod
GO:0031345	negative regulation of cell projection organization	86	0.460323	1.21527	0.046953	0.173551	Gardiquimod
GO:0051347	positive regulation of transferase activity	392	0.397209	1.11563	0.046953	0.173551	Gardiquimod
GO:0009263	deoxyribonucleotide biosynthetic process	13	0.629291	1.40341	0.0469867	0.173551	Gardiquimod
GO:0043647	inositol phosphate metabolic process	41	0.51004	1.29676	0.047	0.173551	Gardiquimod
GO:0099024	plasma membrane invagination	29	0.539255	1.33036	0.0470942	0.173736	Gardiquimod
GO:0070884	regulation of calcineurin-NFAT signaling cascade	20	0.578161	1.37083	0.0471888	0.173761	Gardiquimod
GO:0106056	regulation of calcineurin-mediated signaling	20	0.578161	1.37083	0.0471888	0.173761	Gardiquimod
GO:0036474	cell death in response to hydrogen peroxide	19	0.588888	1.38889	0.0473313	0.174124	Gardiquimod
GO:0043552	positive regulation of phosphatidylinositol 3-kinase activity	17	0.601231	1.39047	0.0475228	0.17418	Gardiquimod
GO:0070306	lens fiber cell differentiation	17	0.59963	1.38677	0.0475228	0.17418	Gardiquimod
GO:1901798	positive regulation of signal transduction by p53 class mediator	17	0.604522	1.39808	0.0475228	0.17418	Gardiquimod
GO:2000209	regulation of anoikis	17	0.598923	1.38514	0.0475228	0.17418	Gardiquimod
GO:0015701	bicarbonate transport	11	0.655192	1.42649	0.0479666	0.175644	Gardiquimod
GO:0097421	liver regeneration	19	0.586919	1.38424	0.0483384	0.176841	Gardiquimod
GO:0032526	response to retinoic acid	42	0.504981	1.28615	0.049	0.178794	Gardiquimod
GO:0035050	embryonic heart tube development	34	0.529207	1.32596	0.049	0.178794	Gardiquimod
GO:0030224	monocyte differentiation	23	0.562553	1.35474	0.0490982	0.178794	Gardiquimod
GO:0031638	zymogen activation	27	0.544655	1.33463	0.0490982	0.178794	Gardiquimod
GO:1903131	mononuclear cell differentiation	23	0.562553	1.35474	0.0490982	0.178794	Gardiquimod
GO:0007622	rhythmic behavior	19	0.585871	1.38177	0.0493454	0.179529	Gardiquimod
GO:0060706	cell differentiation involved in embryonic placenta development	12	0.642239	1.41255	0.0494845	0.17987	Gardiquimod
GO:1902914	regulation of protein polyubiquitination	17	0.595649	1.37756	0.049545	0.179924	Gardiquimod
GO:0070920	regulation of production of small RNA involved in gene silencing by RNA	15	0.610974	1.39959	0.0496454	0.179958	Gardiquimod
GO:1903798	regulation of production of miRNAs involved in gene silencing by miRNA	15	0.610974	1.39959	0.0496454	0.179958	Gardiquimod
GO:1902993	positive regulation of amyloid precursor protein catabolic process	11	0.651691	1.41887	0.0500521	0.181267	Gardiquimod
GO:0090183	regulation of kidney development	21	0.577495	1.37688	0.0502008	0.181639	Gardiquimod
GO:0032516	positive regulation of phosphoprotein phosphatase activity	15	0.605711	1.38753	0.0506586	0.183127	Gardiquimod
GO:0046323	glucose import	35	0.524996	1.31641	0.0509491	0.184009	Gardiquimod
GO:0043517	positive regulation of DNA damage response, signal transduction by p53 class mediator	11	0.651356	1.41814	0.0510949	0.184226	Gardiquimod
GO:0003073	regulation of systemic arterial blood pressure	25	0.554152	1.34736	0.0511022	0.184226	Gardiquimod
GO:0038179	neurotrophin signaling pathway	22	0.566234	1.35621	0.0512048	0.184428	Gardiquimod
GO:0032816	positive regulation of natural killer cell activation	12	0.637181	1.40142	0.0515464	0.185152	Gardiquimod
GO:0042311	vasodilation	12	0.637503	1.40213	0.0515464	0.185152	Gardiquimod
GO:0060986	endocrine hormone secretion	12	0.637494	1.40211	0.0515464	0.185152	Gardiquimod
GO:0070723	response to cholesterol	15	0.604992	1.38589	0.0516717	0.185434	Gardiquimod
GO:0046889	positive regulation of lipid biosynthetic process	42	0.502277	1.27926	0.052	0.186251	Gardiquimod
GO:0055021	regulation of cardiac muscle tissue growth	32	0.522828	1.3014	0.052	0.186251	Gardiquimod
GO:0032965	regulation of collagen biosynthetic process	14	0.61778	1.39375	0.0520408	0.186251	Gardiquimod
GO:0045987	positive regulation of smooth muscle contraction	11	0.651176	1.41774	0.0521376	0.186429	Gardiquimod
GO:0033028	myeloid cell apoptotic process	19	0.582691	1.37427	0.0523666	0.187079	Gardiquimod
GO:0007368	determination of left/right symmetry	47	0.497154	1.2741	0.053	0.189	Gardiquimod
GO:0070167	regulation of biomineral tissue development	34	0.518774	1.29982	0.053	0.189	Gardiquimod
GO:0018230	peptidyl-L-cysteine S-palmitoylation	13	0.620776	1.38442	0.0531154	0.189071	Gardiquimod
GO:0018231	peptidyl-S-diacylglycerol-L-cysteine biosynthetic process from peptidyl-cysteine	13	0.620776	1.38442	0.0531154	0.189071	Gardiquimod
GO:0033032	regulation of myeloid cell apoptotic process	17	0.592629	1.37058	0.0535895	0.190482	Gardiquimod
GO:0051482	positive regulation of cytosolic calcium ion concentration involved in phospholipase C-activating G protein-coupled signaling pathway	12	0.636291	1.39947	0.0536082	0.190482	Gardiquimod
GO:0033135	regulation of peptidyl-serine phosphorylation	74	0.469073	1.2293	0.0539461	0.19151	Gardiquimod
GO:0043393	regulation of protein binding	137	0.429173	1.1663	0.0549451	0.194882	Gardiquimod
GO:0046854	phosphatidylinositol phosphorylation	43	0.497674	1.27015	0.055	0.194902	Gardiquimod
GO:0006911	phagocytosis, engulfment	24	0.554832	1.34184	0.0551655	0.195313	Gardiquimod
GO:0014706	striated muscle tissue development	162	0.42272	1.15384	0.0559441	0.197666	Gardiquimod
GO:0097190	apoptotic signaling pathway	429	0.391343	1.10089	0.0559441	0.197666	Gardiquimod
GO:0006471	protein ADP-ribosylation	27	0.540434	1.32429	0.0561122	0.197666	Gardiquimod
GO:0045671	negative regulation of osteoclast differentiation	14	0.611832	1.38033	0.0561224	0.197666	Gardiquimod
GO:0090153	regulation of sphingolipid biosynthetic process	13	0.619544	1.38167	0.0561798	0.197666	Gardiquimod
GO:1905038	regulation of membrane lipid metabolic process	13	0.619544	1.38167	0.0561798	0.197666	Gardiquimod
GO:2000303	regulation of ceramide biosynthetic process	13	0.619544	1.38167	0.0561798	0.197666	Gardiquimod
GO:0045684	positive regulation of epidermis development	17	0.590791	1.36633	0.0566229	0.198969	Gardiquimod
GO:0015693	magnesium ion transport	12	0.634161	1.39478	0.056701	0.198969	Gardiquimod
GO:1903830	magnesium ion transmembrane transport	12	0.634161	1.39478	0.056701	0.198969	Gardiquimod
GO:0001816	cytokine production	454	0.47841	1.35693	0.000999001	0.066207	IFNγ
GO:0001817	regulation of cytokine production	413	0.481177	1.36046	0.000999001	0.066207	IFNγ
GO:0001819	positive regulation of cytokine production	271	0.464343	1.2957	0.000999001	0.066207	IFNγ
GO:0002790	peptide secretion	304	0.491086	1.37451	0.000999001	0.066207	IFNγ
GO:0002791	regulation of peptide secretion	238	0.475262	1.32172	0.000999001	0.066207	IFNγ
GO:0006954	inflammatory response	334	0.457019	1.28363	0.000999001	0.066207	IFNγ
GO:0007259	JAK-STAT cascade	75	0.552237	1.46731	0.000999001	0.066207	IFNγ
GO:0009306	protein secretion	293	0.486972	1.36069	0.000999001	0.066207	IFNγ
GO:0009612	response to mechanical stimulus	96	0.544832	1.4625	0.000999001	0.066207	IFNγ
GO:0009615	response to virus	239	0.583188	1.62232	0.000999001	0.066207	IFNγ
GO:0009617	response to bacterium	281	0.475413	1.32804	0.000999001	0.066207	IFNγ
GO:0018108	peptidyl-tyrosine phosphorylation	176	0.502112	1.38085	0.000999001	0.066207	IFNγ
GO:0018212	peptidyl-tyrosine modification	179	0.506371	1.3942	0.000999001	0.066207	IFNγ
GO:0019221	cytokine-mediated signaling pathway	478	0.475513	1.35015	0.000999001	0.066207	IFNγ
GO:0031347	regulation of defense response	456	0.44435	1.26055	0.000999001	0.066207	IFNγ
GO:0032101	regulation of response to external stimulus	382	0.439752	1.2401	0.000999001	0.066207	IFNγ
GO:0032479	regulation of type I interferon production	110	0.541526	1.45955	0.000999001	0.066207	IFNγ
GO:0032606	type I interferon production	112	0.539382	1.45523	0.000999001	0.066207	IFNγ
GO:0032611	interleukin-1 beta production	46	0.663707	1.7106	0.000999001	0.066207	IFNγ
GO:0032612	interleukin-1 production	51	0.665234	1.72553	0.000999001	0.066207	IFNγ
GO:0032635	interleukin-6 production	77	0.570231	1.51651	0.000999001	0.066207	IFNγ
GO:0032652	regulation of interleukin-1 production	46	0.619781	1.59739	0.000999001	0.066207	IFNγ
GO:0032675	regulation of interleukin-6 production	72	0.567153	1.50325	0.000999001	0.066207	IFNγ
GO:0034340	response to type I interferon	74	0.680274	1.80645	0.000999001	0.066207	IFNγ
GO:0034341	response to interferon-gamma	130	0.701369	1.9053	0.000999001	0.066207	IFNγ
GO:0045088	regulation of innate immune response	297	0.473275	1.32319	0.000999001	0.066207	IFNγ
GO:0045089	positive regulation of innate immune response	250	0.462025	1.28733	0.000999001	0.066207	IFNγ
GO:0045596	negative regulation of cell differentiation	332	0.448826	1.26073	0.000999001	0.066207	IFNγ
GO:0046427	positive regulation of JAK-STAT cascade	38	0.659415	1.67399	0.000999001	0.066207	IFNγ
GO:0046631	alpha-beta T cell activation	90	0.531853	1.42282	0.000999001	0.066207	IFNγ
GO:0048525	negative regulation of viral process	73	0.586029	1.55616	0.000999001	0.066207	IFNγ
GO:0050663	cytokine secretion	116	0.58264	1.57404	0.000999001	0.066207	IFNγ
GO:0050707	regulation of cytokine secretion	98	0.548735	1.4742	0.000999001	0.066207	IFNγ
GO:0050708	regulation of protein secretion	228	0.477985	1.32882	0.000999001	0.066207	IFNγ
GO:0050731	positive regulation of peptidyl-tyrosine phosphorylation	78	0.56991	1.51695	0.000999001	0.066207	IFNγ
GO:0051046	regulation of secretion	366	0.437595	1.23209	0.000999001	0.066207	IFNγ
GO:0051607	defense response to virus	176	0.631576	1.73689	0.000999001	0.066207	IFNγ
GO:0060333	interferon-gamma-mediated signaling pathway	71	0.750967	1.99	0.000999001	0.066207	IFNγ
GO:0060337	type I interferon signaling pathway	70	0.695597	1.84219	0.000999001	0.066207	IFNγ
GO:0060760	positive regulation of response to cytokine stimulus	40	0.6708	1.70883	0.000999001	0.066207	IFNγ
GO:0071346	cellular response to interferon-gamma	119	0.695401	1.88115	0.000999001	0.066207	IFNγ
GO:0071357	cellular response to type I interferon	70	0.695597	1.84219	0.000999001	0.066207	IFNγ
GO:0097696	STAT cascade	76	0.549452	1.46021	0.000999001	0.066207	IFNγ
GO:0098542	defense response to other organism	260	0.588804	1.64235	0.000999001	0.066207	IFNγ
GO:1903530	regulation of secretion by cell	347	0.443253	1.24621	0.000999001	0.066207	IFNγ
GO:0006471	protein ADP-ribosylation	27	0.709987	1.75489	0.001001	0.066207	IFNγ
GO:0050691	regulation of defense response to virus by host	30	0.680052	1.6968	0.001001	0.066207	IFNγ
GO:0050702	interleukin-1 beta secretion	27	0.721287	1.78282	0.001001	0.066207	IFNγ
GO:0007189	adenylate cyclase-activating G protein-coupled receptor signaling pathway	24	0.650965	1.58078	0.001002	0.066207	IFNγ
GO:0032728	positive regulation of interferon-beta production	25	0.69691	1.70098	0.001002	0.066207	IFNγ
GO:0042531	positive regulation of tyrosine phosphorylation of STAT protein	26	0.690783	1.69263	0.001002	0.066207	IFNγ
GO:0050701	interleukin-1 secretion	28	0.721104	1.78544	0.001002	0.066207	IFNγ
GO:0050704	regulation of interleukin-1 secretion	24	0.6583	1.59859	0.001002	0.066207	IFNγ
GO:0050706	regulation of interleukin-1 beta secretion	24	0.6583	1.59859	0.001002	0.066207	IFNγ
GO:0098760	response to interleukin-7	25	0.663758	1.62006	0.001002	0.066207	IFNγ
GO:0098761	cellular response to interleukin-7	25	0.663758	1.62006	0.001002	0.066207	IFNγ
GO:0002230	positive regulation of defense response to virus by host	22	0.720628	1.73568	0.00100301	0.066207	IFNγ
GO:0032607	interferon-alpha production	21	0.736226	1.76457	0.00100301	0.066207	IFNγ
GO:0032647	regulation of interferon-alpha production	20	0.76136	1.81968	0.00100301	0.066207	IFNγ
GO:0035456	response to interferon-beta	20	0.79691	1.90465	0.00100301	0.066207	IFNγ
GO:0048247	lymphocyte chemotaxis	23	0.669588	1.61993	0.00100301	0.066207	IFNγ
GO:1904407	positive regulation of nitric oxide metabolic process	22	0.66469	1.60095	0.00100301	0.066207	IFNγ
GO:0060330	regulation of response to interferon-gamma	19	0.785539	1.86954	0.00100503	0.066207	IFNγ
GO:0060334	regulation of interferon-gamma-mediated signaling pathway	19	0.785539	1.86954	0.00100503	0.066207	IFNγ
GO:0042092	type 2 immune response	18	0.789562	1.86483	0.00100806	0.066207	IFNγ
GO:0001773	myeloid dendritic cell activation	17	0.794126	1.85956	0.0010101	0.066207	IFNγ
GO:0038111	interleukin-7-mediated signaling pathway	15	0.774377	1.78052	0.00101729	0.066207	IFNγ
GO:0001562	response to protozoan	13	0.859185	1.92727	0.00102564	0.066207	IFNγ
GO:0032703	negative regulation of interleukin-2 production	13	0.7996	1.79362	0.00102564	0.066207	IFNγ
GO:0035458	cellular response to interferon-beta	13	0.827975	1.85727	0.00102564	0.066207	IFNγ
GO:0042832	defense response to protozoan	13	0.859185	1.92727	0.00102564	0.066207	IFNγ
GO:0043011	myeloid dendritic cell differentiation	11	0.851306	1.86024	0.00103842	0.066207	IFNγ
GO:0001818	negative regulation of cytokine production	159	0.494226	1.35522	0.001998	0.103146	IFNγ
GO:0001959	regulation of cytokine-mediated signaling pathway	116	0.509806	1.37728	0.001998	0.103146	IFNγ
GO:0007162	negative regulation of cell adhesion	150	0.477276	1.30545	0.001998	0.103146	IFNγ
GO:0008285	negative regulation of cell proliferation	358	0.426061	1.19958	0.001998	0.103146	IFNγ
GO:0019932	second-messenger-mediated signaling	152	0.486927	1.33157	0.001998	0.103146	IFNγ
GO:0030155	regulation of cell adhesion	373	0.427413	1.20418	0.001998	0.103146	IFNγ
GO:0042035	regulation of cytokine biosynthetic process	57	0.577943	1.51258	0.001998	0.103146	IFNγ
GO:0043901	negative regulation of multi-organism process	115	0.499704	1.34944	0.001998	0.103146	IFNγ
GO:0046632	alpha-beta T cell differentiation	67	0.559835	1.47802	0.001998	0.103146	IFNγ
GO:0050730	regulation of peptidyl-tyrosine phosphorylation	118	0.518363	1.40195	0.001998	0.103146	IFNγ
GO:0050866	negative regulation of cell activation	110	0.509762	1.37394	0.001998	0.103146	IFNγ
GO:0051093	negative regulation of developmental process	440	0.427512	1.21182	0.001998	0.103146	IFNγ
GO:0060759	regulation of response to cytokine stimulus	123	0.514325	1.39209	0.001998	0.103146	IFNγ
GO:1904894	positive regulation of STAT cascade	39	0.653638	1.66221	0.001998	0.103146	IFNγ
GO:0002755	MyD88-dependent toll-like receptor signaling pathway	27	0.640112	1.58218	0.002002	0.103146	IFNγ
GO:0046633	alpha-beta T cell proliferation	21	0.67572	1.61955	0.00200602	0.103146	IFNγ
GO:0035455	response to interferon-alpha	17	0.712336	1.66803	0.0020202	0.103146	IFNγ
GO:0032727	positive regulation of interferon-alpha production	16	0.728849	1.69629	0.00202224	0.103146	IFNγ
GO:0010818	T cell chemotaxis	12	0.782302	1.72969	0.00206186	0.104011	IFNγ
GO:0001961	positive regulation of cytokine-mediated signaling pathway	36	0.648891	1.63632	0.002997	0.124328	IFNγ
GO:0002237	response to molecule of bacterial origin	182	0.458134	1.26247	0.002997	0.124328	IFNγ
GO:0002695	negative regulation of leukocyte activation	103	0.503736	1.35326	0.002997	0.124328	IFNγ
GO:0002792	negative regulation of peptide secretion	65	0.551538	1.45367	0.002997	0.124328	IFNγ
GO:0002793	positive regulation of peptide secretion	134	0.478929	1.30212	0.002997	0.124328	IFNγ
GO:0003013	circulatory system process	190	0.454462	1.25582	0.002997	0.124328	IFNγ
GO:0007260	tyrosine phosphorylation of STAT protein	38	0.635842	1.61414	0.002997	0.124328	IFNγ
GO:0007600	sensory perception	155	0.469484	1.28547	0.002997	0.124328	IFNγ
GO:0008015	blood circulation	184	0.458992	1.26586	0.002997	0.124328	IFNγ
GO:0031349	positive regulation of defense response	301	0.443553	1.24084	0.002997	0.124328	IFNγ
GO:0032615	interleukin-12 production	35	0.657837	1.65856	0.002997	0.124328	IFNγ
GO:0032655	regulation of interleukin-12 production	34	0.661167	1.66144	0.002997	0.124328	IFNγ
GO:0042509	regulation of tyrosine phosphorylation of STAT protein	36	0.643605	1.62299	0.002997	0.124328	IFNγ
GO:0043122	regulation of I-kappaB kinase/NF-kappaB signaling	168	0.456053	1.25272	0.002997	0.124328	IFNγ
GO:0050688	regulation of defense response to virus	62	0.576083	1.51478	0.002997	0.124328	IFNγ
GO:0050830	defense response to Gram-positive bacterium	34	0.661762	1.66294	0.002997	0.124328	IFNγ
GO:0071216	cellular response to biotic stimulus	139	0.471499	1.28356	0.002997	0.124328	IFNγ
GO:0019233	sensory perception of pain	32	0.641831	1.61039	0.003	0.124328	IFNγ
GO:0032735	positive regulation of interleukin-12 production	19	0.688797	1.6393	0.00301508	0.124328	IFNγ
GO:0034162	toll-like receptor 9 signaling pathway	17	0.697652	1.63365	0.0030303	0.124328	IFNγ
GO:0033280	response to vitamin D	16	0.70926	1.6507	0.00303337	0.124328	IFNγ
GO:0002683	negative regulation of immune system process	257	0.442778	1.23492	0.003996	0.143886	IFNγ
GO:0016525	negative regulation of angiogenesis	38	0.633191	1.60741	0.003996	0.143886	IFNγ
GO:0032651	regulation of interleukin-1 beta production	42	0.61367	1.57117	0.003996	0.143886	IFNγ
GO:0042089	cytokine biosynthetic process	61	0.546442	1.43597	0.003996	0.143886	IFNγ
GO:0042107	cytokine metabolic process	61	0.546442	1.43597	0.003996	0.143886	IFNγ
GO:0042742	defense response to bacterium	78	0.52798	1.40534	0.003996	0.143886	IFNγ
GO:0043900	regulation of multi-organism process	279	0.437732	1.22301	0.003996	0.143886	IFNγ
GO:0046425	regulation of JAK-STAT cascade	61	0.555987	1.46105	0.003996	0.143886	IFNγ
GO:1901343	negative regulation of vasculature development	43	0.611096	1.56793	0.003996	0.143886	IFNγ
GO:1903901	negative regulation of viral life cycle	61	0.559365	1.46993	0.003996	0.143886	IFNγ
GO:2000181	negative regulation of blood vessel morphogenesis	38	0.633191	1.60741	0.003996	0.143886	IFNγ
GO:0045058	T cell selection	29	0.622579	1.54295	0.00400802	0.143886	IFNγ
GO:0045581	negative regulation of T cell differentiation	29	0.625266	1.54961	0.00400802	0.143886	IFNγ
GO:0042310	vasoconstriction	22	0.646266	1.55658	0.00401204	0.143886	IFNγ
GO:1904645	response to amyloid-beta	22	0.646698	1.55762	0.00401204	0.143886	IFNγ
GO:1904646	cellular response to amyloid-beta	22	0.646698	1.55762	0.00401204	0.143886	IFNγ
GO:0032480	negative regulation of type I interferon production	42	0.605515	1.55029	0.004995	0.17146	IFNγ
GO:0050868	negative regulation of T cell activation	69	0.532736	1.40989	0.004995	0.17146	IFNγ
GO:0050877	nervous system process	334	0.426324	1.19741	0.004995	0.17146	IFNγ
GO:1904892	regulation of STAT cascade	62	0.551827	1.451	0.004995	0.17146	IFNγ
GO:0045620	negative regulation of lymphocyte differentiation	32	0.604684	1.51719	0.005	0.17146	IFNγ
GO:0032732	positive regulation of interleukin-1 production	30	0.606089	1.51226	0.00500501	0.17146	IFNγ
GO:0002828	regulation of type 2 immune response	14	0.733215	1.6715	0.00509165	0.173136	IFNγ
GO:2001034	positive regulation of double-strand break repair via nonhomologous end joining	11	0.78908	1.72426	0.00519211	0.174518	IFNγ
GO:1901623	regulation of lymphocyte chemotaxis	10	0.794025	1.70881	0.00520833	0.174518	IFNγ
GO:0001505	regulation of neurotransmitter levels	155	0.455652	1.24759	0.00599401	0.184174	IFNγ
GO:0007187	G protein-coupled receptor signaling pathway, coupled to cyclic nucleotide second messenger	50	0.577585	1.49551	0.00599401	0.184174	IFNγ
GO:0032496	response to lipopolysaccharide	173	0.45291	1.24505	0.00599401	0.184174	IFNγ
GO:0032755	positive regulation of interleukin-6 production	44	0.589797	1.51527	0.00599401	0.184174	IFNγ
GO:0032943	mononuclear cell proliferation	159	0.454081	1.24513	0.00599401	0.184174	IFNγ
GO:0042108	positive regulation of cytokine biosynthetic process	39	0.585817	1.48973	0.00599401	0.184174	IFNγ
GO:0042157	lipoprotein metabolic process	89	0.515445	1.37776	0.00599401	0.184174	IFNγ
GO:0050709	negative regulation of protein secretion	64	0.55176	1.4531	0.00599401	0.184174	IFNγ
GO:0050714	positive regulation of protein secretion	127	0.481445	1.30544	0.00599401	0.184174	IFNγ
GO:0050727	regulation of inflammatory response	175	0.451431	1.24151	0.00599401	0.184174	IFNγ
GO:0070741	response to interleukin-6	23	0.632653	1.53057	0.00601805	0.184174	IFNγ
GO:0071354	cellular response to interleukin-6	23	0.632653	1.53057	0.00601805	0.184174	IFNγ
GO:0097028	dendritic cell differentiation	22	0.636384	1.53278	0.00601805	0.184174	IFNγ
GO:0007520	myoblast fusion	17	0.68127	1.59529	0.00606061	0.184247	IFNγ
GO:0019883	antigen processing and presentation of endogenous antigen	15	0.711769	1.63656	0.00610376	0.184339	IFNγ
GO:0007204	positive regulation of cytosolic calcium ion concentration	127	0.470533	1.27585	0.00699301	0.19632	IFNγ
GO:0007249	I-kappaB kinase/NF-kappaB signaling	194	0.443447	1.22605	0.00699301	0.19632	IFNγ
GO:0019933	cAMP-mediated signaling	44	0.589013	1.51325	0.00699301	0.19632	IFNγ
GO:0032608	interferon-beta production	44	0.585125	1.50327	0.00699301	0.19632	IFNγ
GO:0032648	regulation of interferon-beta production	42	0.5883	1.50622	0.00699301	0.19632	IFNγ
GO:0045071	negative regulation of viral genome replication	46	0.585916	1.5101	0.00699301	0.19632	IFNγ
GO:0046488	phosphatidylinositol metabolic process	125	0.477401	1.29383	0.00699301	0.19632	IFNγ
GO:0051047	positive regulation of secretion	195	0.443188	1.22597	0.00699301	0.19632	IFNγ
GO:0070661	leukocyte proliferation	164	0.448367	1.23078	0.00699301	0.19632	IFNγ
GO:1903409	reactive oxygen species biosynthetic process	57	0.548001	1.43422	0.00699301	0.19632	IFNγ
GO:1903532	positive regulation of secretion by cell	186	0.444962	1.22815	0.00699301	0.19632	IFNγ
GO:0032731	positive regulation of interleukin-1 beta production	28	0.613151	1.51815	0.00701403	0.19632	IFNγ
GO:0046640	regulation of alpha-beta T cell proliferation	18	0.673616	1.59098	0.00705645	0.19632	IFNγ
GO:0003159	morphogenesis of an endothelium	13	0.740176	1.66032	0.00717949	0.197188	IFNγ
GO:0061154	endothelial tube morphogenesis	13	0.740176	1.66032	0.00717949	0.197188	IFNγ
GO:0042532	negative regulation of tyrosine phosphorylation of STAT protein	12	0.764117	1.68948	0.00721649	0.197188	IFNγ
GO:0010324	membrane invagination	35	0.572082	1.49487	0.001998	1	IGF-1
GO:0032885	regulation of polysaccharide biosynthetic process	23	0.645284	1.62577	0.002002	1	IGF-1
GO:0070873	regulation of glycogen metabolic process	23	0.647882	1.63231	0.002002	1	IGF-1
GO:0005979	regulation of glycogen biosynthetic process	19	0.688114	1.69263	0.00201207	1	IGF-1
GO:0010962	regulation of glucan biosynthetic process	19	0.688114	1.69263	0.00201207	1	IGF-1
GO:2000209	regulation of anoikis	17	0.694322	1.68045	0.00201207	1	IGF-1
GO:0043249	erythrocyte maturation	10	0.80263	1.80265	0.00208117	1	IGF-1
GO:0007187	G protein-coupled receptor signaling pathway, coupled to cyclic nucleotide second messenger	50	0.527523	1.42347	0.002997	1	IGF-1
GO:0032881	regulation of polysaccharide metabolic process	27	0.611875	1.56861	0.002997	1	IGF-1
GO:0060840	artery development	36	0.549355	1.43985	0.002997	1	IGF-1
GO:0044275	cellular carbohydrate catabolic process	30	0.588916	1.52181	0.003	1	IGF-1
GO:0099024	plasma membrane invagination	29	0.598651	1.54012	0.003	1	IGF-1
GO:0006004	fucose metabolic process	10	0.756184	1.69833	0.00312175	1	IGF-1
GO:0007519	skeletal muscle tissue development	71	0.498558	1.37309	0.003996	1	IGF-1
GO:0015748	organophosphate ester transport	61	0.509862	1.39222	0.003996	1	IGF-1
GO:0003151	outflow tract morphogenesis	25	0.600811	1.52923	0.004004	1	IGF-1
GO:0006911	phagocytosis, engulfment	24	0.63071	1.59777	0.004004	1	IGF-1
GO:0007188	adenylate cyclase-modulating G protein-coupled receptor signaling pathway	46	0.529108	1.41649	0.004995	1	IGF-1
GO:0035904	aorta development	24	0.604775	1.53207	0.00500501	1	IGF-1
GO:0050922	negative regulation of chemotaxis	21	0.636666	1.58314	0.00501505	1	IGF-1
GO:0030336	negative regulation of cell migration	129	0.471828	1.36471	0.000999001	0.284786	PFOA
GO:0030595	leukocyte chemotaxis	93	0.473165	1.34251	0.000999001	0.284786	PFOA
GO:0034109	homotypic cell-cell adhesion	36	0.566822	1.50323	0.000999001	0.284786	PFOA
GO:0051271	negative regulation of cellular component movement	151	0.461852	1.34164	0.000999001	0.284786	PFOA
GO:0060761	negative regulation of response to cytokine stimulus	38	0.576491	1.53532	0.000999001	0.284786	PFOA
GO:0097529	myeloid leukocyte migration	85	0.490416	1.38518	0.000999001	0.284786	PFOA
GO:2000146	negative regulation of cell motility	137	0.46823	1.35741	0.000999001	0.284786	PFOA
GO:0070527	platelet aggregation	29	0.608812	1.57463	0.001001	0.284786	PFOA
GO:1901998	toxin transport	28	0.620783	1.59975	0.001001	0.284786	PFOA
GO:1903035	negative regulation of response to wounding	29	0.642305	1.66125	0.001001	0.284786	PFOA
GO:0061045	negative regulation of wound healing	24	0.708083	1.80068	0.00100301	0.284786	PFOA
GO:0061844	antimicrobial humoral immune response mediated by antimicrobial peptide	15	0.716404	1.72534	0.00101729	0.284786	PFOA
GO:0021801	cerebral cortex radial glia guided migration	14	0.722397	1.71598	0.00102249	0.284786	PFOA
GO:0022030	telencephalon glial cell migration	14	0.722397	1.71598	0.00102249	0.284786	PFOA
GO:0030195	negative regulation of blood coagulation	11	0.859973	1.9379	0.0010582	0.284786	PFOA
GO:0042135	neurotransmitter catabolic process	10	0.782136	1.7328	0.0010582	0.284786	PFOA
GO:0050819	negative regulation of coagulation	11	0.859973	1.9379	0.0010582	0.284786	PFOA
GO:1900047	negative regulation of hemostasis	11	0.859973	1.9379	0.0010582	0.284786	PFOA
GO:0042133	neurotransmitter metabolic process	69	0.509847	1.41664	0.001998	0.351999	PFOA
GO:0048144	fibroblast proliferation	53	0.542892	1.47846	0.001998	0.351999	PFOA
GO:0000165	MAPK cascade	495	0.585334	1.4534	0.000999001	0.010132	Dexamethasone
GO:0000302	response to reactive oxygen species	148	0.59238	1.43412	0.000999001	0.010132	Dexamethasone
GO:0000902	cell morphogenesis	494	0.50011	1.24173	0.000999001	0.010132	Dexamethasone
GO:0001101	response to acid chemical	174	0.576602	1.40211	0.000999001	0.010132	Dexamethasone
GO:0001501	skeletal system development	210	0.5536	1.35307	0.000999001	0.010132	Dexamethasone
GO:0001503	ossification	178	0.591619	1.44015	0.000999001	0.010132	Dexamethasone
GO:0001505	regulation of neurotransmitter levels	155	0.609912	1.47924	0.000999001	0.010132	Dexamethasone
GO:0001525	angiogenesis	220	0.585429	1.43311	0.000999001	0.010132	Dexamethasone
GO:0001568	blood vessel development	304	0.568054	1.39729	0.000999001	0.010132	Dexamethasone
GO:0001570	vasculogenesis	38	0.686205	1.56076	0.000999001	0.010132	Dexamethasone
GO:0001655	urogenital system development	145	0.592382	1.43328	0.000999001	0.010132	Dexamethasone
GO:0001656	metanephros development	29	0.791401	1.77036	0.000999001	0.010132	Dexamethasone
GO:0001657	ureteric bud development	35	0.754825	1.70608	0.000999001	0.010132	Dexamethasone
GO:0001666	response to hypoxia	228	0.545862	1.33686	0.000999001	0.010132	Dexamethasone
GO:0001816	cytokine production	454	0.556969	1.38123	0.000999001	0.010132	Dexamethasone
GO:0001817	regulation of cytokine production	413	0.571307	1.41484	0.000999001	0.010132	Dexamethasone
GO:0001818	negative regulation of cytokine production	159	0.637149	1.54558	0.000999001	0.010132	Dexamethasone
GO:0001819	positive regulation of cytokine production	271	0.550827	1.35198	0.000999001	0.010132	Dexamethasone
GO:0001822	kidney development	124	0.605481	1.45404	0.000999001	0.010132	Dexamethasone
GO:0001823	mesonephros development	36	0.747138	1.6909	0.000999001	0.010132	Dexamethasone
GO:0001944	vasculature development	323	0.56001	1.38027	0.000999001	0.010132	Dexamethasone
GO:0002009	morphogenesis of an epithelium	271	0.539048	1.32307	0.000999001	0.010132	Dexamethasone
GO:0002040	sprouting angiogenesis	53	0.706953	1.6394	0.000999001	0.010132	Dexamethasone
GO:0002221	pattern recognition receptor signaling pathway	130	0.586656	1.41183	0.000999001	0.010132	Dexamethasone
GO:0002237	response to molecule of bacterial origin	182	0.619047	1.50698	0.000999001	0.010132	Dexamethasone
GO:0002250	adaptive immune response	238	0.552611	1.35543	0.000999001	0.010132	Dexamethasone
GO:0002286	T cell activation involved in immune response	61	0.65693	1.53255	0.000999001	0.010132	Dexamethasone
GO:0002437	inflammatory response to antigenic stimulus	27	0.739968	1.64529	0.000999001	0.010132	Dexamethasone
GO:0002521	leukocyte differentiation	313	0.590536	1.45339	0.000999001	0.010132	Dexamethasone
GO:0002526	acute inflammatory response	49	0.663842	1.53609	0.000999001	0.010132	Dexamethasone
GO:0002573	myeloid leukocyte differentiation	120	0.595798	1.42862	0.000999001	0.010132	Dexamethasone
GO:0002673	regulation of acute inflammatory response	30	0.716564	1.60742	0.000999001	0.010132	Dexamethasone
GO:0002683	negative regulation of immune system process	257	0.608817	1.49281	0.000999001	0.010132	Dexamethasone
GO:0002685	regulation of leukocyte migration	97	0.625764	1.48686	0.000999001	0.010132	Dexamethasone
GO:0002687	positive regulation of leukocyte migration	63	0.667935	1.5609	0.000999001	0.010132	Dexamethasone
GO:0002694	regulation of leukocyte activation	306	0.593409	1.4604	0.000999001	0.010132	Dexamethasone
GO:0002696	positive regulation of leukocyte activation	192	0.615368	1.50137	0.000999001	0.010132	Dexamethasone
GO:0002697	regulation of immune effector process	234	0.560922	1.37491	0.000999001	0.010132	Dexamethasone
GO:0002718	regulation of cytokine production involved in immune response	50	0.665439	1.54144	0.000999001	0.010132	Dexamethasone
GO:0002757	immune response-activating signal transduction	361	0.488986	1.20677	0.000999001	0.010132	Dexamethasone
GO:0002761	regulation of myeloid leukocyte differentiation	65	0.678871	1.58639	0.000999001	0.010132	Dexamethasone
GO:0002764	immune response-regulating signaling pathway	383	0.499283	1.23415	0.000999001	0.010132	Dexamethasone
GO:0002790	peptide secretion	304	0.544512	1.33938	0.000999001	0.010132	Dexamethasone
GO:0002791	regulation of peptide secretion	238	0.567975	1.39311	0.000999001	0.010132	Dexamethasone
GO:0002792	negative regulation of peptide secretion	65	0.67664	1.58118	0.000999001	0.010132	Dexamethasone
GO:0003006	developmental process involved in reproduction	299	0.532051	1.30868	0.000999001	0.010132	Dexamethasone
GO:0003007	heart morphogenesis	97	0.624138	1.48299	0.000999001	0.010132	Dexamethasone
GO:0006809	nitric oxide biosynthetic process	38	0.723889	1.64647	0.000999001	0.010132	Dexamethasone
GO:0006874	cellular calcium ion homeostasis	196	0.551066	1.34565	0.000999001	0.010132	Dexamethasone
GO:0006875	cellular metal ion homeostasis	264	0.514428	1.26269	0.000999001	0.010132	Dexamethasone
GO:0006935	chemotaxis	252	0.584724	1.43408	0.000999001	0.010132	Dexamethasone
GO:0006954	inflammatory response	334	0.599542	1.47867	0.000999001	0.010132	Dexamethasone
GO:0006970	response to osmotic stress	48	0.675683	1.55926	0.000999001	0.010132	Dexamethasone
GO:0006979	response to oxidative stress	299	0.530252	1.30425	0.000999001	0.010132	Dexamethasone
GO:0007159	leukocyte cell-cell adhesion	208	0.617787	1.51065	0.000999001	0.010132	Dexamethasone
GO:0007167	enzyme linked receptor protein signaling pathway	500	0.534876	1.32841	0.000999001	0.010132	Dexamethasone
GO:0007169	transmembrane receptor protein tyrosine kinase signaling pathway	362	0.545828	1.3475	0.000999001	0.010132	Dexamethasone
GO:0007186	G protein-coupled receptor signaling pathway	260	0.651088	1.59745	0.000999001	0.010132	Dexamethasone
GO:0007187	G protein-coupled receptor signaling pathway, coupled to cyclic nucleotide second messenger	50	0.668067	1.54753	0.000999001	0.010132	Dexamethasone
GO:0007204	positive regulation of cytosolic calcium ion concentration	127	0.625071	1.502	0.000999001	0.010132	Dexamethasone
GO:0007254	JNK cascade	132	0.608769	1.46692	0.000999001	0.010132	Dexamethasone
GO:0007268	chemical synaptic transmission	244	0.526775	1.29253	0.000999001	0.010132	Dexamethasone
GO:0007548	sex differentiation	118	0.606977	1.45473	0.000999001	0.010132	Dexamethasone
GO:0007600	sensory perception	155	0.592961	1.43813	0.000999001	0.010132	Dexamethasone
GO:0008284	positive regulation of cell proliferation	432	0.539967	1.33839	0.000999001	0.010132	Dexamethasone
GO:0008285	negative regulation of cell proliferation	358	0.514463	1.26923	0.000999001	0.010132	Dexamethasone
GO:0008584	male gonad development	66	0.67129	1.57043	0.000999001	0.010132	Dexamethasone
GO:0009306	protein secretion	293	0.544136	1.33743	0.000999001	0.010132	Dexamethasone
GO:0009410	response to xenobiotic stimulus	124	0.606344	1.45612	0.000999001	0.010132	Dexamethasone
GO:0009611	response to wounding	309	0.552341	1.35922	0.000999001	0.010132	Dexamethasone
GO:0009615	response to virus	239	0.554591	1.36025	0.000999001	0.010132	Dexamethasone
GO:0009617	response to bacterium	281	0.593881	1.45732	0.000999001	0.010132	Dexamethasone
GO:0009636	response to toxic substance	281	0.594176	1.45804	0.000999001	0.010132	Dexamethasone
GO:0009887	animal organ morphogenesis	433	0.572165	1.41823	0.000999001	0.010132	Dexamethasone
GO:0009896	positive regulation of catabolic process	310	0.502993	1.23771	0.000999001	0.010132	Dexamethasone
GO:0009914	hormone transport	133	0.575084	1.3862	0.000999001	0.010132	Dexamethasone
GO:0010035	response to inorganic substance	312	0.539736	1.32812	0.000999001	0.010132	Dexamethasone
GO:0010720	positive regulation of cell development	266	0.524642	1.28799	0.000999001	0.010132	Dexamethasone
GO:0010817	regulation of hormone levels	196	0.566548	1.38346	0.000999001	0.010132	Dexamethasone
GO:0010942	positive regulation of cell death	460	0.497113	1.2334	0.000999001	0.010132	Dexamethasone
GO:0010959	regulation of metal ion transport	157	0.557932	1.3535	0.000999001	0.010132	Dexamethasone
GO:0014009	glial cell proliferation	27	0.790546	1.75775	0.000999001	0.010132	Dexamethasone
GO:0014015	positive regulation of gliogenesis	37	0.74512	1.68959	0.000999001	0.010132	Dexamethasone
GO:0014070	response to organic cyclic compound	487	0.547464	1.35901	0.000999001	0.010132	Dexamethasone
GO:0018108	peptidyl-tyrosine phosphorylation	176	0.560488	1.36344	0.000999001	0.010132	Dexamethasone
GO:0018212	peptidyl-tyrosine modification	179	0.562687	1.37004	0.000999001	0.010132	Dexamethasone
GO:0019221	cytokine-mediated signaling pathway	478	0.5396	1.3397	0.000999001	0.010132	Dexamethasone
GO:0019233	sensory perception of pain	32	0.731149	1.64223	0.000999001	0.010132	Dexamethasone
GO:0019932	second-messenger-mediated signaling	152	0.620896	1.50512	0.000999001	0.010132	Dexamethasone
GO:0019933	cAMP-mediated signaling	44	0.667843	1.53191	0.000999001	0.010132	Dexamethasone
GO:0019935	cyclic-nucleotide-mediated signaling	51	0.655644	1.51887	0.000999001	0.010132	Dexamethasone
GO:0022407	regulation of cell-cell adhesion	234	0.622761	1.52649	0.000999001	0.010132	Dexamethasone
GO:0022409	positive regulation of cell-cell adhesion	157	0.667844	1.62014	0.000999001	0.010132	Dexamethasone
GO:0022612	gland morphogenesis	54	0.651296	1.5113	0.000999001	0.010132	Dexamethasone
GO:0030003	cellular cation homeostasis	311	0.499964	1.23022	0.000999001	0.010132	Dexamethasone
GO:0030029	actin filament-based process	400	0.502948	1.24486	0.000999001	0.010132	Dexamethasone
GO:0030036	actin cytoskeleton organization	371	0.504982	1.24703	0.000999001	0.010132	Dexamethasone
GO:0030098	lymphocyte differentiation	220	0.604212	1.47909	0.000999001	0.010132	Dexamethasone
GO:0030099	myeloid cell differentiation	262	0.51575	1.26613	0.000999001	0.010132	Dexamethasone
GO:0030155	regulation of cell adhesion	373	0.584539	1.44344	0.000999001	0.010132	Dexamethasone
GO:0030217	T cell differentiation	153	0.621712	1.50663	0.000999001	0.010132	Dexamethasone
GO:0030278	regulation of ossification	88	0.666119	1.57552	0.000999001	0.010132	Dexamethasone
GO:0030279	negative regulation of ossification	38	0.69628	1.58368	0.000999001	0.010132	Dexamethasone
GO:0030323	respiratory tube development	73	0.702747	1.64849	0.000999001	0.010132	Dexamethasone
GO:0030324	lung development	70	0.69468	1.62614	0.000999001	0.010132	Dexamethasone
GO:0030334	regulation of cell migration	437	0.539707	1.33795	0.000999001	0.010132	Dexamethasone
GO:0030335	positive regulation of cell migration	268	0.583627	1.43248	0.000999001	0.010132	Dexamethasone
GO:0030595	leukocyte chemotaxis	93	0.651222	1.54467	0.000999001	0.010132	Dexamethasone
GO:0030855	epithelial cell differentiation	260	0.547986	1.34449	0.000999001	0.010132	Dexamethasone
GO:0031098	stress-activated protein kinase signaling cascade	200	0.582417	1.42287	0.000999001	0.010132	Dexamethasone
GO:0031175	neuron projection development	473	0.490037	1.21619	0.000999001	0.010132	Dexamethasone
GO:0031347	regulation of defense response	456	0.533461	1.32312	0.000999001	0.010132	Dexamethasone
GO:0031349	positive regulation of defense response	301	0.518992	1.27651	0.000999001	0.010132	Dexamethasone
GO:0031667	response to nutrient levels	284	0.508043	1.2475	0.000999001	0.010132	Dexamethasone
GO:0031960	response to corticosteroid	72	0.750634	1.76011	0.000999001	0.010132	Dexamethasone
GO:0032101	regulation of response to external stimulus	382	0.579315	1.43171	0.000999001	0.010132	Dexamethasone
GO:0032102	negative regulation of response to external stimulus	149	0.580579	1.40643	0.000999001	0.010132	Dexamethasone
GO:0032103	positive regulation of response to external stimulus	140	0.635581	1.53536	0.000999001	0.010132	Dexamethasone
GO:0032496	response to lipopolysaccharide	173	0.611626	1.48733	0.000999001	0.010132	Dexamethasone
GO:0032504	multicellular organism reproduction	383	0.49249	1.21736	0.000999001	0.010132	Dexamethasone
GO:0032609	interferon-gamma production	56	0.707967	1.64634	0.000999001	0.010132	Dexamethasone
GO:0032649	regulation of interferon-gamma production	50	0.732493	1.69677	0.000999001	0.010132	Dexamethasone
GO:0032729	positive regulation of interferon-gamma production	34	0.735832	1.65918	0.000999001	0.010132	Dexamethasone
GO:0032868	response to insulin	177	0.575747	1.40108	0.000999001	0.010132	Dexamethasone
GO:0032870	cellular response to hormone stimulus	390	0.537473	1.32907	0.000999001	0.010132	Dexamethasone
GO:0032872	regulation of stress-activated MAPK cascade	142	0.615955	1.48989	0.000999001	0.010132	Dexamethasone
GO:0032874	positive regulation of stress-activated MAPK cascade	96	0.636261	1.51136	0.000999001	0.010132	Dexamethasone
GO:0033002	muscle cell proliferation	96	0.634314	1.50673	0.000999001	0.010132	Dexamethasone
GO:0033674	positive regulation of kinase activity	328	0.534109	1.31671	0.000999001	0.010132	Dexamethasone
GO:0033993	response to lipid	480	0.560014	1.39055	0.000999001	0.010132	Dexamethasone
GO:0035239	tube morphogenesis	386	0.582067	1.43909	0.000999001	0.010132	Dexamethasone
GO:0035270	endocrine system development	48	0.696131	1.60645	0.000999001	0.010132	Dexamethasone
GO:0035295	tube development	470	0.570996	1.41717	0.000999001	0.010132	Dexamethasone
GO:0035690	cellular response to drug	217	0.605174	1.48067	0.000999001	0.010132	Dexamethasone
GO:0035710	CD4-positive, alpha-beta T cell activation	61	0.691738	1.61376	0.000999001	0.010132	Dexamethasone
GO:0036293	response to decreased oxygen levels	237	0.537946	1.31923	0.000999001	0.010132	Dexamethasone
GO:0040017	positive regulation of locomotion	286	0.571367	1.40319	0.000999001	0.010132	Dexamethasone
GO:0042060	wound healing	259	0.531035	1.30252	0.000999001	0.010132	Dexamethasone
GO:0042102	positive regulation of T cell proliferation	53	0.645343	1.49653	0.000999001	0.010132	Dexamethasone
GO:0042108	positive regulation of cytokine biosynthetic process	39	0.681838	1.55394	0.000999001	0.010132	Dexamethasone
GO:0042110	T cell activation	287	0.587743	1.44353	0.000999001	0.010132	Dexamethasone
GO:0042116	macrophage activation	47	0.697049	1.60801	0.000999001	0.010132	Dexamethasone
GO:0042133	neurotransmitter metabolic process	69	0.68665	1.60772	0.000999001	0.010132	Dexamethasone
GO:0042136	neurotransmitter biosynthetic process	46	0.716811	1.65152	0.000999001	0.010132	Dexamethasone
GO:0042326	negative regulation of phosphorylation	284	0.507076	1.24513	0.000999001	0.010132	Dexamethasone
GO:0042330	taxis	254	0.58621	1.43754	0.000999001	0.010132	Dexamethasone
GO:0042542	response to hydrogen peroxide	97	0.615349	1.46211	0.000999001	0.010132	Dexamethasone
GO:0043065	positive regulation of apoptotic process	431	0.487045	1.20713	0.000999001	0.010132	Dexamethasone
GO:0043066	negative regulation of apoptotic process	500	0.492904	1.22417	0.000999001	0.010132	Dexamethasone
GO:0043068	positive regulation of programmed cell death	435	0.489867	1.21421	0.000999001	0.010132	Dexamethasone
GO:0043087	regulation of GTPase activity	291	0.517445	1.27134	0.000999001	0.010132	Dexamethasone
GO:0043269	regulation of ion transport	253	0.552417	1.35466	0.000999001	0.010132	Dexamethasone
GO:0043367	CD4-positive, alpha-beta T cell differentiation	52	0.690226	1.6001	0.000999001	0.010132	Dexamethasone
GO:0043370	regulation of CD4-positive, alpha-beta T cell differentiation	33	0.703533	1.58328	0.000999001	0.010132	Dexamethasone
GO:0043405	regulation of MAP kinase activity	205	0.60927	1.48924	0.000999001	0.010132	Dexamethasone
GO:0043406	positive regulation of MAP kinase activity	151	0.604379	1.46485	0.000999001	0.010132	Dexamethasone
GO:0043408	regulation of MAPK cascade	380	0.593379	1.46597	0.000999001	0.010132	Dexamethasone
GO:0043410	positive regulation of MAPK cascade	259	0.604469	1.48263	0.000999001	0.010132	Dexamethasone
GO:0043434	response to peptide hormone	260	0.568912	1.39583	0.000999001	0.010132	Dexamethasone
GO:0043491	protein kinase B signaling	120	0.627142	1.50378	0.000999001	0.010132	Dexamethasone
GO:0043525	positive regulation of neuron apoptotic process	40	0.683973	1.56216	0.000999001	0.010132	Dexamethasone
GO:0043901	negative regulation of multi-organism process	115	0.605797	1.4499	0.000999001	0.010132	Dexamethasone
GO:0045165	cell fate commitment	77	0.641577	1.50771	0.000999001	0.010132	Dexamethasone
GO:0045428	regulation of nitric oxide biosynthetic process	33	0.743702	1.67368	0.000999001	0.010132	Dexamethasone
GO:0045444	fat cell differentiation	115	0.628126	1.50334	0.000999001	0.010132	Dexamethasone
GO:0045471	response to ethanol	62	0.662619	1.5464	0.000999001	0.010132	Dexamethasone
GO:0045580	regulation of T cell differentiation	95	0.632572	1.50088	0.000999001	0.010132	Dexamethasone
GO:0045596	negative regulation of cell differentiation	332	0.598854	1.47626	0.000999001	0.010132	Dexamethasone
GO:0045597	positive regulation of cell differentiation	480	0.538526	1.3372	0.000999001	0.010132	Dexamethasone
GO:0045598	regulation of fat cell differentiation	63	0.684794	1.6003	0.000999001	0.010132	Dexamethasone
GO:0045619	regulation of lymphocyte differentiation	109	0.636574	1.52071	0.000999001	0.010132	Dexamethasone
GO:0045621	positive regulation of lymphocyte differentiation	63	0.655244	1.53125	0.000999001	0.010132	Dexamethasone
GO:0045638	negative regulation of myeloid cell differentiation	48	0.698878	1.61279	0.000999001	0.010132	Dexamethasone
GO:0045670	regulation of osteoclast differentiation	35	0.749217	1.69341	0.000999001	0.010132	Dexamethasone
GO:0045765	regulation of angiogenesis	127	0.664551	1.59686	0.000999001	0.010132	Dexamethasone
GO:0045766	positive regulation of angiogenesis	74	0.65958	1.54616	0.000999001	0.010132	Dexamethasone
GO:0045785	positive regulation of cell adhesion	228	0.620223	1.51897	0.000999001	0.010132	Dexamethasone
GO:0045833	negative regulation of lipid metabolic process	39	0.683124	1.55687	0.000999001	0.010132	Dexamethasone
GO:0045859	regulation of protein kinase activity	484	0.494771	1.22834	0.000999001	0.010132	Dexamethasone
GO:0045860	positive regulation of protein kinase activity	303	0.537944	1.32298	0.000999001	0.010132	Dexamethasone
GO:0045913	positive regulation of carbohydrate metabolic process	46	0.665588	1.5335	0.000999001	0.010132	Dexamethasone
GO:0046209	nitric oxide metabolic process	41	0.718307	1.64418	0.000999001	0.010132	Dexamethasone
GO:0046328	regulation of JNK cascade	112	0.617382	1.47574	0.000999001	0.010132	Dexamethasone
GO:0046330	positive regulation of JNK cascade	82	0.636737	1.49933	0.000999001	0.010132	Dexamethasone
GO:0046546	development of primary male sexual characteristics	67	0.6757	1.58259	0.000999001	0.010132	Dexamethasone
GO:0046631	alpha-beta T cell activation	90	0.67673	1.60289	0.000999001	0.010132	Dexamethasone
GO:0046632	alpha-beta T cell differentiation	67	0.681382	1.5959	0.000999001	0.010132	Dexamethasone
GO:0046634	regulation of alpha-beta T cell activation	61	0.689469	1.60846	0.000999001	0.010132	Dexamethasone
GO:0046637	regulation of alpha-beta T cell differentiation	42	0.681499	1.56137	0.000999001	0.010132	Dexamethasone
GO:0046649	lymphocyte activation	423	0.561585	1.39115	0.000999001	0.010132	Dexamethasone
GO:0046661	male sex differentiation	74	0.672956	1.57751	0.000999001	0.010132	Dexamethasone
GO:0046677	response to antibiotic	193	0.599508	1.46308	0.000999001	0.010132	Dexamethasone
GO:0046717	acid secretion	40	0.697976	1.59415	0.000999001	0.010132	Dexamethasone
GO:0048008	platelet-derived growth factor receptor signaling pathway	35	0.74332	1.68008	0.000999001	0.010132	Dexamethasone
GO:0048514	blood vessel morphogenesis	260	0.58793	1.44249	0.000999001	0.010132	Dexamethasone
GO:0048545	response to steroid hormone	203	0.58699	1.43387	0.000999001	0.010132	Dexamethasone
GO:0048565	digestive tract development	43	0.688072	1.57652	0.000999001	0.010132	Dexamethasone
GO:0048568	embryonic organ development	182	0.572685	1.39412	0.000999001	0.010132	Dexamethasone
GO:0048589	developmental growth	318	0.540982	1.33228	0.000999001	0.010132	Dexamethasone
GO:0048608	reproductive structure development	203	0.560394	1.3689	0.000999001	0.010132	Dexamethasone
GO:0048609	multicellular organismal reproductive process	382	0.491474	1.21462	0.000999001	0.010132	Dexamethasone
GO:0048646	anatomical structure formation involved in morphogenesis	472	0.536442	1.33162	0.000999001	0.010132	Dexamethasone
GO:0048661	positive regulation of smooth muscle cell proliferation	49	0.667009	1.54341	0.000999001	0.010132	Dexamethasone
GO:0048729	tissue morphogenesis	310	0.565543	1.39163	0.000999001	0.010132	Dexamethasone
GO:0048732	gland development	214	0.590546	1.44326	0.000999001	0.010132	Dexamethasone
GO:0048812	neuron projection morphogenesis	290	0.502853	1.23527	0.000999001	0.010132	Dexamethasone
GO:0048872	homeostasis of number of cells	171	0.594915	1.44642	0.000999001	0.010132	Dexamethasone
GO:0050663	cytokine secretion	116	0.623428	1.49274	0.000999001	0.010132	Dexamethasone
GO:0050673	epithelial cell proliferation	181	0.596061	1.45115	0.000999001	0.010132	Dexamethasone
GO:0050678	regulation of epithelial cell proliferation	156	0.59123	1.43436	0.000999001	0.010132	Dexamethasone
GO:0050707	regulation of cytokine secretion	98	0.637807	1.51601	0.000999001	0.010132	Dexamethasone
GO:0050708	regulation of protein secretion	228	0.571951	1.40075	0.000999001	0.010132	Dexamethasone
GO:0050709	negative regulation of protein secretion	64	0.681591	1.59398	0.000999001	0.010132	Dexamethasone
GO:0050710	negative regulation of cytokine secretion	33	0.749985	1.68782	0.000999001	0.010132	Dexamethasone
GO:0050727	regulation of inflammatory response	175	0.600069	1.45938	0.000999001	0.010132	Dexamethasone
GO:0050729	positive regulation of inflammatory response	61	0.653611	1.52481	0.000999001	0.010132	Dexamethasone
GO:0050767	regulation of neurogenesis	391	0.493269	1.22001	0.000999001	0.010132	Dexamethasone
GO:0050769	positive regulation of neurogenesis	231	0.524813	1.28576	0.000999001	0.010132	Dexamethasone
GO:0050778	positive regulation of immune response	491	0.514033	1.27625	0.000999001	0.010132	Dexamethasone
GO:0050863	regulation of T cell activation	201	0.588181	1.43675	0.000999001	0.010132	Dexamethasone
GO:0050865	regulation of cell activation	318	0.596768	1.46966	0.000999001	0.010132	Dexamethasone
GO:0050866	negative regulation of cell activation	110	0.613064	1.46496	0.000999001	0.010132	Dexamethasone
GO:0050867	positive regulation of cell activation	195	0.614685	1.50069	0.000999001	0.010132	Dexamethasone
GO:0050870	positive regulation of T cell activation	132	0.635142	1.53047	0.000999001	0.010132	Dexamethasone
GO:0050877	nervous system process	334	0.519668	1.28167	0.000999001	0.010132	Dexamethasone
GO:0050900	leukocyte migration	206	0.608599	1.48767	0.000999001	0.010132	Dexamethasone
GO:0050921	positive regulation of chemotaxis	60	0.66933	1.55963	0.000999001	0.010132	Dexamethasone
GO:0051046	regulation of secretion	366	0.529267	1.30693	0.000999001	0.010132	Dexamethasone
GO:0051048	negative regulation of secretion	99	0.621028	1.47708	0.000999001	0.010132	Dexamethasone
GO:0051051	negative regulation of transport	236	0.522264	1.2807	0.000999001	0.010132	Dexamethasone
GO:0051090	regulation of DNA-binding transcription factor activity	273	0.553135	1.35767	0.000999001	0.010132	Dexamethasone
GO:0051093	negative regulation of developmental process	440	0.566703	1.40462	0.000999001	0.010132	Dexamethasone
GO:0051223	regulation of protein transport	408	0.51401	1.27301	0.000999001	0.010132	Dexamethasone
GO:0051249	regulation of lymphocyte activation	267	0.585358	1.43674	0.000999001	0.010132	Dexamethasone
GO:0051251	positive regulation of lymphocyte activation	174	0.604717	1.47047	0.000999001	0.010132	Dexamethasone
GO:0051270	regulation of cellular component movement	499	0.524838	1.30357	0.000999001	0.010132	Dexamethasone
GO:0051272	positive regulation of cellular component movement	277	0.575828	1.41296	0.000999001	0.010132	Dexamethasone
GO:0051347	positive regulation of transferase activity	392	0.520127	1.28652	0.000999001	0.010132	Dexamethasone
GO:0051384	response to glucocorticoid	64	0.764558	1.78801	0.000999001	0.010132	Dexamethasone
GO:0051403	stress-activated MAPK cascade	180	0.595877	1.45061	0.000999001	0.010132	Dexamethasone
GO:0051480	regulation of cytosolic calcium ion concentration	138	0.601474	1.45223	0.000999001	0.010132	Dexamethasone
GO:0051896	regulation of protein kinase B signaling	107	0.610182	1.45694	0.000999001	0.010132	Dexamethasone
GO:0051897	positive regulation of protein kinase B signaling	70	0.710548	1.66328	0.000999001	0.010132	Dexamethasone
GO:0051960	regulation of nervous system development	421	0.48657	1.20519	0.000999001	0.010132	Dexamethasone
GO:0055065	metal ion homeostasis	296	0.50562	1.24325	0.000999001	0.010132	Dexamethasone
GO:0055074	calcium ion homeostasis	200	0.553707	1.35273	0.000999001	0.010132	Dexamethasone
GO:0055123	digestive system development	48	0.69256	1.59821	0.000999001	0.010132	Dexamethasone
GO:0060284	regulation of cell development	450	0.505145	1.25275	0.000999001	0.010132	Dexamethasone
GO:0060326	cell chemotaxis	121	0.63848	1.53154	0.000999001	0.010132	Dexamethasone
GO:0060359	response to ammonium ion	59	0.664391	1.54757	0.000999001	0.010132	Dexamethasone
GO:0060537	muscle tissue development	171	0.552792	1.344	0.000999001	0.010132	Dexamethasone
GO:0060541	respiratory system development	83	0.666815	1.57104	0.000999001	0.010132	Dexamethasone
GO:0060993	kidney morphogenesis	35	0.728936	1.64757	0.000999001	0.010132	Dexamethasone
GO:0061041	regulation of wound healing	49	0.672568	1.55628	0.000999001	0.010132	Dexamethasone
GO:0061061	muscle structure development	298	0.512419	1.26032	0.000999001	0.010132	Dexamethasone
GO:0061138	morphogenesis of a branching epithelium	73	0.639578	1.50031	0.000999001	0.010132	Dexamethasone
GO:0061458	reproductive system development	205	0.559358	1.36724	0.000999001	0.010132	Dexamethasone
GO:0061515	myeloid cell development	46	0.674005	1.55289	0.000999001	0.010132	Dexamethasone
GO:0062013	positive regulation of small molecule metabolic process	74	0.646028	1.51439	0.000999001	0.010132	Dexamethasone
GO:0070201	regulation of establishment of protein localization	451	0.499531	1.23892	0.000999001	0.010132	Dexamethasone
GO:0070302	regulation of stress-activated protein kinase signaling cascade	144	0.616742	1.49235	0.000999001	0.010132	Dexamethasone
GO:0070304	positive regulation of stress-activated protein kinase signaling cascade	97	0.629723	1.49626	0.000999001	0.010132	Dexamethasone
GO:0070371	ERK1 and ERK2 cascade	145	0.633318	1.53233	0.000999001	0.010132	Dexamethasone
GO:0070372	regulation of ERK1 and ERK2 cascade	133	0.616761	1.48665	0.000999001	0.010132	Dexamethasone
GO:0070374	positive regulation of ERK1 and ERK2 cascade	90	0.66188	1.56772	0.000999001	0.010132	Dexamethasone
GO:0070482	response to oxygen levels	255	0.53081	1.30202	0.000999001	0.010132	Dexamethasone
GO:0070848	response to growth factor	343	0.521834	1.28724	0.000999001	0.010132	Dexamethasone
GO:0071216	cellular response to biotic stimulus	139	0.607141	1.46652	0.000999001	0.010132	Dexamethasone
GO:0071219	cellular response to molecule of bacterial origin	117	0.623449	1.49321	0.000999001	0.010132	Dexamethasone
GO:0071222	cellular response to lipopolysaccharide	112	0.61324	1.46584	0.000999001	0.010132	Dexamethasone
GO:0071229	cellular response to acid chemical	103	0.664069	1.58304	0.000999001	0.010132	Dexamethasone
GO:0071356	cellular response to tumor necrosis factor	182	0.547218	1.33212	0.000999001	0.010132	Dexamethasone
GO:0071363	cellular response to growth factor stimulus	329	0.515548	1.27096	0.000999001	0.010132	Dexamethasone
GO:0071375	cellular response to peptide hormone stimulus	196	0.550984	1.34545	0.000999001	0.010132	Dexamethasone
GO:0071384	cellular response to corticosteroid stimulus	34	0.80204	1.80847	0.000999001	0.010132	Dexamethasone
GO:0071385	cellular response to glucocorticoid stimulus	32	0.812334	1.82458	0.000999001	0.010132	Dexamethasone
GO:0071396	cellular response to lipid	332	0.564219	1.39088	0.000999001	0.010132	Dexamethasone
GO:0071407	cellular response to organic cyclic compound	318	0.539745	1.32923	0.000999001	0.010132	Dexamethasone
GO:0071417	cellular response to organonitrogen compound	341	0.547948	1.3513	0.000999001	0.010132	Dexamethasone
GO:0071559	response to transforming growth factor beta	130	0.577155	1.38896	0.000999001	0.010132	Dexamethasone
GO:0071560	cellular response to transforming growth factor beta stimulus	126	0.576989	1.38584	0.000999001	0.010132	Dexamethasone
GO:0071674	mononuclear cell migration	38	0.702719	1.59832	0.000999001	0.010132	Dexamethasone
GO:0071900	regulation of protein serine/threonine kinase activity	327	0.529994	1.30642	0.000999001	0.010132	Dexamethasone
GO:0071902	positive regulation of protein serine/threonine kinase activity	202	0.560084	1.36825	0.000999001	0.010132	Dexamethasone
GO:0072001	renal system development	126	0.598627	1.43781	0.000999001	0.010132	Dexamethasone
GO:0072028	nephron morphogenesis	27	0.747342	1.66169	0.000999001	0.010132	Dexamethasone
GO:0072088	nephron epithelium morphogenesis	27	0.747342	1.66169	0.000999001	0.010132	Dexamethasone
GO:0072163	mesonephric epithelium development	36	0.747138	1.6909	0.000999001	0.010132	Dexamethasone
GO:0072164	mesonephric tubule development	36	0.747138	1.6909	0.000999001	0.010132	Dexamethasone
GO:0072358	cardiovascular system development	327	0.558225	1.37601	0.000999001	0.010132	Dexamethasone
GO:0072507	divalent inorganic cation homeostasis	220	0.545176	1.33457	0.000999001	0.010132	Dexamethasone
GO:0072593	reactive oxygen species metabolic process	148	0.60647	1.46824	0.000999001	0.010132	Dexamethasone
GO:0072676	lymphocyte migration	54	0.696171	1.61543	0.000999001	0.010132	Dexamethasone
GO:0072678	T cell migration	37	0.687626	1.55922	0.000999001	0.010132	Dexamethasone
GO:0090087	regulation of peptide transport	420	0.513329	1.2714	0.000999001	0.010132	Dexamethasone
GO:0097305	response to alcohol	119	0.592923	1.42139	0.000999001	0.010132	Dexamethasone
GO:0097366	response to bronchodilator	29	0.763972	1.709	0.000999001	0.010132	Dexamethasone
GO:0097529	myeloid leukocyte migration	85	0.632846	1.49376	0.000999001	0.010132	Dexamethasone
GO:0097530	granulocyte migration	53	0.64765	1.50188	0.000999001	0.010132	Dexamethasone
GO:0098542	defense response to other organism	260	0.541665	1.32898	0.000999001	0.010132	Dexamethasone
GO:0098609	cell-cell adhesion	352	0.587025	1.44828	0.000999001	0.010132	Dexamethasone
GO:0098771	inorganic ion homeostasis	346	0.492337	1.21443	0.000999001	0.010132	Dexamethasone
GO:0098916	anterograde trans-synaptic signaling	244	0.526775	1.29253	0.000999001	0.010132	Dexamethasone
GO:0099536	synaptic signaling	251	0.522345	1.281	0.000999001	0.010132	Dexamethasone
GO:0099537	trans-synaptic signaling	247	0.524641	1.28743	0.000999001	0.010132	Dexamethasone
GO:0110110	positive regulation of animal organ morphogenesis	30	0.749952	1.68232	0.000999001	0.010132	Dexamethasone
GO:0120039	plasma membrane bounded cell projection morphogenesis	300	0.501843	1.23437	0.000999001	0.010132	Dexamethasone
GO:1901214	regulation of neuron death	184	0.550171	1.33903	0.000999001	0.010132	Dexamethasone
GO:1901216	positive regulation of neuron death	65	0.683615	1.59748	0.000999001	0.010132	Dexamethasone
GO:1901342	regulation of vasculature development	143	0.634929	1.53596	0.000999001	0.010132	Dexamethasone
GO:1901652	response to peptide	306	0.564346	1.38888	0.000999001	0.010132	Dexamethasone
GO:1901653	cellular response to peptide	232	0.562102	1.37753	0.000999001	0.010132	Dexamethasone
GO:1901654	response to ketone	96	0.65128	1.54703	0.000999001	0.010132	Dexamethasone
GO:1901655	cellular response to ketone	50	0.665837	1.54236	0.000999001	0.010132	Dexamethasone
GO:1901699	cellular response to nitrogen compound	376	0.538301	1.32971	0.000999001	0.010132	Dexamethasone
GO:1902105	regulation of leukocyte differentiation	166	0.644261	1.56429	0.000999001	0.010132	Dexamethasone
GO:1902106	negative regulation of leukocyte differentiation	57	0.721393	1.67982	0.000999001	0.010132	Dexamethasone
GO:1902107	positive regulation of leukocyte differentiation	94	0.628755	1.49166	0.000999001	0.010132	Dexamethasone
GO:1902532	negative regulation of intracellular signal transduction	344	0.530928	1.30969	0.000999001	0.010132	Dexamethasone
GO:1903034	regulation of response to wounding	60	0.670859	1.5632	0.000999001	0.010132	Dexamethasone
GO:1903037	regulation of leukocyte cell-cell adhesion	191	0.619219	1.51007	0.000999001	0.010132	Dexamethasone
GO:1903039	positive regulation of leukocyte cell-cell adhesion	144	0.647734	1.56734	0.000999001	0.010132	Dexamethasone
GO:1903409	reactive oxygen species biosynthetic process	57	0.715004	1.66495	0.000999001	0.010132	Dexamethasone
GO:1903426	regulation of reactive oxygen species biosynthetic process	48	0.723761	1.67021	0.000999001	0.010132	Dexamethasone
GO:1903428	positive regulation of reactive oxygen species biosynthetic process	27	0.747751	1.6626	0.000999001	0.010132	Dexamethasone
GO:1903530	regulation of secretion by cell	347	0.539208	1.33016	0.000999001	0.010132	Dexamethasone
GO:1903531	negative regulation of secretion by cell	93	0.630203	1.49481	0.000999001	0.010132	Dexamethasone
GO:1903532	positive regulation of secretion by cell	186	0.538848	1.31188	0.000999001	0.010132	Dexamethasone
GO:1903670	regulation of sprouting angiogenesis	36	0.783455	1.77309	0.000999001	0.010132	Dexamethasone
GO:1903706	regulation of hemopoiesis	308	0.56356	1.3869	0.000999001	0.010132	Dexamethasone
GO:1903707	negative regulation of hemopoiesis	84	0.675469	1.59314	0.000999001	0.010132	Dexamethasone
GO:1903708	positive regulation of hemopoiesis	119	0.613241	1.47009	0.000999001	0.010132	Dexamethasone
GO:1904018	positive regulation of vasculature development	84	0.635001	1.49769	0.000999001	0.010132	Dexamethasone
GO:1990868	response to chemokine	32	0.768593	1.72634	0.000999001	0.010132	Dexamethasone
GO:1990869	cellular response to chemokine	32	0.768593	1.72634	0.000999001	0.010132	Dexamethasone
GO:2000027	regulation of animal organ morphogenesis	123	0.655391	1.57318	0.000999001	0.010132	Dexamethasone
GO:2000106	regulation of leukocyte apoptotic process	51	0.666582	1.54421	0.000999001	0.010132	Dexamethasone
GO:2000145	regulation of cell motility	463	0.532007	1.32018	0.000999001	0.010132	Dexamethasone
GO:2000147	positive regulation of cell motility	270	0.581383	1.42706	0.000999001	0.010132	Dexamethasone
GO:2000379	positive regulation of reactive oxygen species metabolic process	50	0.665605	1.54182	0.000999001	0.010132	Dexamethasone
GO:2000514	regulation of CD4-positive, alpha-beta T cell activation	39	0.703343	1.60295	0.000999001	0.010132	Dexamethasone
GO:2001057	reactive nitrogen species metabolic process	43	0.705038	1.61539	0.000999001	0.010132	Dexamethasone
GO:0002762	negative regulation of myeloid leukocyte differentiation	25	0.789131	1.73533	0.001	0.010132	Dexamethasone
GO:0060688	regulation of morphogenesis of a branching structure	23	0.777346	1.69911	0.001	0.010132	Dexamethasone
GO:0070098	chemokine-mediated signaling pathway	25	0.788241	1.73337	0.001	0.010132	Dexamethasone
GO:0002701	negative regulation of production of molecular mediator of immune response	20	0.843777	1.82981	0.001002	0.010132	Dexamethasone
GO:0071548	response to dexamethasone	19	0.801049	1.7352	0.00100301	0.010132	Dexamethasone
GO:0002719	negative regulation of cytokine production involved in immune response	14	0.871402	1.82096	0.00102145	0.0102887	Dexamethasone
GO:0003401	axis elongation	10	0.909313	1.82118	0.00105042	0.0105501	Dexamethasone
GO:0000187	activation of MAPK activity	90	0.580009	1.3738	0.001998	0.0132422	Dexamethasone
GO:0001649	osteoblast differentiation	109	0.577096	1.37862	0.001998	0.0132422	Dexamethasone
GO:0001763	morphogenesis of a branching structure	81	0.629741	1.48246	0.001998	0.0132422	Dexamethasone
GO:0001764	neuron migration	67	0.610104	1.42896	0.001998	0.0132422	Dexamethasone
GO:0001776	leukocyte homeostasis	59	0.636653	1.48296	0.001998	0.0132422	Dexamethasone
GO:0002224	toll-like receptor signaling pathway	94	0.611712	1.45123	0.001998	0.0132422	Dexamethasone
GO:0002253	activation of immune response	386	0.481486	1.19041	0.001998	0.0132422	Dexamethasone
GO:0002262	myeloid cell homeostasis	103	0.607711	1.44869	0.001998	0.0132422	Dexamethasone
GO:0002285	lymphocyte activation involved in immune response	116	0.568057	1.36016	0.001998	0.0132422	Dexamethasone
GO:0002292	T cell differentiation involved in immune response	45	0.660689	1.51841	0.001998	0.0132422	Dexamethasone
GO:0002367	cytokine production involved in immune response	60	0.650426	1.51559	0.001998	0.0132422	Dexamethasone
GO:0002690	positive regulation of leukocyte chemotaxis	43	0.666022	1.526	0.001998	0.0132422	Dexamethasone
GO:0002695	negative regulation of leukocyte activation	103	0.607869	1.44907	0.001998	0.0132422	Dexamethasone
GO:0002698	negative regulation of immune effector process	76	0.602971	1.41499	0.001998	0.0132422	Dexamethasone
GO:0002699	positive regulation of immune effector process	132	0.554462	1.33606	0.001998	0.0132422	Dexamethasone
GO:0002819	regulation of adaptive immune response	104	0.594209	1.41753	0.001998	0.0132422	Dexamethasone
GO:0002821	positive regulation of adaptive immune response	68	0.605482	1.41814	0.001998	0.0132422	Dexamethasone
GO:0002822	regulation of adaptive immune response based on somatic recombination of immune receptors built from immunoglobulin superfamily domains	91	0.583581	1.38269	0.001998	0.0132422	Dexamethasone
GO:0003013	circulatory system process	190	0.5368	1.30875	0.001998	0.0132422	Dexamethasone
GO:0003158	endothelium development	59	0.610739	1.42259	0.001998	0.0132422	Dexamethasone
GO:0003205	cardiac chamber development	66	0.603312	1.4114	0.001998	0.0132422	Dexamethasone
GO:0006873	cellular ion homeostasis	314	0.49948	1.22913	0.001998	0.0132422	Dexamethasone
GO:0007162	negative regulation of cell adhesion	150	0.546584	1.32457	0.001998	0.0132422	Dexamethasone
GO:0007249	I-kappaB kinase/NF-kappaB signaling	194	0.531021	1.29596	0.001998	0.0132422	Dexamethasone
GO:0007259	JAK-STAT cascade	75	0.5948	1.39405	0.001998	0.0132422	Dexamethasone
GO:0007411	axon guidance	99	0.588346	1.39934	0.001998	0.0132422	Dexamethasone
GO:0007423	sensory organ development	208	0.529019	1.29359	0.001998	0.0132422	Dexamethasone
GO:0008015	blood circulation	184	0.536295	1.30526	0.001998	0.0132422	Dexamethasone
GO:0008286	insulin receptor signaling pathway	91	0.604365	1.43193	0.001998	0.0132422	Dexamethasone
GO:0008406	gonad development	98	0.598567	1.42274	0.001998	0.0132422	Dexamethasone
GO:0008544	epidermis development	124	0.564246	1.35502	0.001998	0.0132422	Dexamethasone
GO:0009612	response to mechanical stimulus	96	0.609007	1.44662	0.001998	0.0132422	Dexamethasone
GO:0010563	negative regulation of phosphorus metabolic process	357	0.489452	1.20763	0.001998	0.0132422	Dexamethasone
GO:0010594	regulation of endothelial cell migration	80	0.605157	1.42403	0.001998	0.0132422	Dexamethasone
GO:0010595	positive regulation of endothelial cell migration	55	0.637888	1.48096	0.001998	0.0132422	Dexamethasone
GO:0010632	regulation of epithelial cell migration	118	0.575954	1.38038	0.001998	0.0132422	Dexamethasone
GO:0010634	positive regulation of epithelial cell migration	81	0.614541	1.44668	0.001998	0.0132422	Dexamethasone
GO:0010676	positive regulation of cellular carbohydrate metabolic process	34	0.681778	1.5373	0.001998	0.0132422	Dexamethasone
GO:0014013	regulation of gliogenesis	57	0.623319	1.45145	0.001998	0.0132422	Dexamethasone
GO:0014065	phosphatidylinositol 3-kinase signaling	80	0.634242	1.49247	0.001998	0.0132422	Dexamethasone
GO:0014066	regulation of phosphatidylinositol 3-kinase signaling	67	0.617978	1.4474	0.001998	0.0132422	Dexamethasone
GO:0014068	positive regulation of phosphatidylinositol 3-kinase signaling	44	0.65433	1.50091	0.001998	0.0132422	Dexamethasone
GO:0014074	response to purine-containing compound	68	0.62157	1.45582	0.001998	0.0132422	Dexamethasone
GO:0014706	striated muscle tissue development	162	0.554021	1.34533	0.001998	0.0132422	Dexamethasone
GO:0019722	calcium-mediated signaling	98	0.603468	1.43439	0.001998	0.0132422	Dexamethasone
GO:0023061	signal release	196	0.527769	1.28877	0.001998	0.0132422	Dexamethasone
GO:0030101	natural killer cell activation	38	0.671137	1.52649	0.001998	0.0132422	Dexamethasone
GO:0030168	platelet activation	79	0.602688	1.41721	0.001998	0.0132422	Dexamethasone
GO:0030198	extracellular matrix organization	121	0.573581	1.37587	0.001998	0.0132422	Dexamethasone
GO:0030316	osteoclast differentiation	58	0.649934	1.51386	0.001998	0.0132422	Dexamethasone
GO:0030509	BMP signaling pathway	60	0.636214	1.48247	0.001998	0.0132422	Dexamethasone
GO:0030510	regulation of BMP signaling pathway	35	0.683561	1.54501	0.001998	0.0132422	Dexamethasone
GO:0030856	regulation of epithelial cell differentiation	62	0.59917	1.39832	0.001998	0.0132422	Dexamethasone
GO:0030879	mammary gland development	76	0.607335	1.42523	0.001998	0.0132422	Dexamethasone
GO:0031331	positive regulation of cellular catabolic process	266	0.512643	1.25853	0.001998	0.0132422	Dexamethasone
GO:0032147	activation of protein kinase activity	194	0.520981	1.27146	0.001998	0.0132422	Dexamethasone
GO:0032355	response to estradiol	65	0.624643	1.45967	0.001998	0.0132422	Dexamethasone
GO:0032613	interleukin-10 production	26	0.724753	1.60209	0.001998	0.0132422	Dexamethasone
GO:0032623	interleukin-2 production	37	0.670719	1.52088	0.001998	0.0132422	Dexamethasone
GO:0032635	interleukin-6 production	77	0.611171	1.43626	0.001998	0.0132422	Dexamethasone
GO:0032663	regulation of interleukin-2 production	34	0.681726	1.53718	0.001998	0.0132422	Dexamethasone
GO:0032675	regulation of interleukin-6 production	72	0.632295	1.48263	0.001998	0.0132422	Dexamethasone
GO:0032768	regulation of monooxygenase activity	31	0.703805	1.57675	0.001998	0.0132422	Dexamethasone
GO:0032869	cellular response to insulin stimulus	143	0.580875	1.4052	0.001998	0.0132422	Dexamethasone
GO:0032944	regulation of mononuclear cell proliferation	121	0.572806	1.37401	0.001998	0.0132422	Dexamethasone
GO:0032946	positive regulation of mononuclear cell proliferation	74	0.619061	1.45117	0.001998	0.0132422	Dexamethasone
GO:0033135	regulation of peptidyl-serine phosphorylation	74	0.611692	1.4339	0.001998	0.0132422	Dexamethasone
GO:0034121	regulation of toll-like receptor signaling pathway	39	0.664897	1.51533	0.001998	0.0132422	Dexamethasone
GO:0034612	response to tumor necrosis factor	194	0.538102	1.31324	0.001998	0.0132422	Dexamethasone
GO:0034614	cellular response to reactive oxygen species	108	0.571294	1.36461	0.001998	0.0132422	Dexamethasone
GO:0034762	regulation of transmembrane transport	220	0.523607	1.28177	0.001998	0.0132422	Dexamethasone
GO:0035150	regulation of tube size	46	0.6506	1.49897	0.001998	0.0132422	Dexamethasone
GO:0035265	organ growth	81	0.603459	1.42059	0.001998	0.0132422	Dexamethasone
GO:0035296	regulation of tube diameter	46	0.6506	1.49897	0.001998	0.0132422	Dexamethasone
GO:0042063	gliogenesis	138	0.576094	1.39095	0.001998	0.0132422	Dexamethasone
GO:0042089	cytokine biosynthetic process	61	0.606701	1.41537	0.001998	0.0132422	Dexamethasone
GO:0042093	T-helper cell differentiation	41	0.669705	1.53293	0.001998	0.0132422	Dexamethasone
GO:0042107	cytokine metabolic process	61	0.606701	1.41537	0.001998	0.0132422	Dexamethasone
GO:0042303	molting cycle	47	0.650269	1.5001	0.001998	0.0132422	Dexamethasone
GO:0042445	hormone metabolic process	71	0.626353	1.46656	0.001998	0.0132422	Dexamethasone
GO:0042471	ear morphogenesis	36	0.668278	1.51242	0.001998	0.0132422	Dexamethasone
GO:0042476	odontogenesis	45	0.65624	1.50819	0.001998	0.0132422	Dexamethasone
GO:0042633	hair cycle	47	0.650269	1.5001	0.001998	0.0132422	Dexamethasone
GO:0042742	defense response to bacterium	78	0.595447	1.39951	0.001998	0.0132422	Dexamethasone
GO:0043029	T cell homeostasis	27	0.717378	1.59506	0.001998	0.0132422	Dexamethasone
GO:0043030	regulation of macrophage activation	26	0.733438	1.62129	0.001998	0.0132422	Dexamethasone
GO:0043409	negative regulation of MAPK cascade	106	0.593992	1.41763	0.001998	0.0132422	Dexamethasone
GO:0043433	negative regulation of DNA-binding transcription factor activity	109	0.600138	1.43367	0.001998	0.0132422	Dexamethasone
GO:0043506	regulation of JUN kinase activity	59	0.652861	1.52071	0.001998	0.0132422	Dexamethasone
GO:0043507	positive regulation of JUN kinase activity	50	0.648373	1.50191	0.001998	0.0132422	Dexamethasone
GO:0043523	regulation of neuron apoptotic process	114	0.579765	1.38715	0.001998	0.0132422	Dexamethasone
GO:0043900	regulation of multi-organism process	279	0.505248	1.23991	0.001998	0.0132422	Dexamethasone
GO:0045137	development of primary sexual characteristics	99	0.603432	1.43522	0.001998	0.0132422	Dexamethasone
GO:0045582	positive regulation of T cell differentiation	56	0.670055	1.55818	0.001998	0.0132422	Dexamethasone
GO:0045599	negative regulation of fat cell differentiation	26	0.751799	1.66188	0.001998	0.0132422	Dexamethasone
GO:0045637	regulation of myeloid cell differentiation	150	0.546026	1.32322	0.001998	0.0132422	Dexamethasone
GO:0045667	regulation of osteoblast differentiation	56	0.675014	1.56971	0.001998	0.0132422	Dexamethasone
GO:0045834	positive regulation of lipid metabolic process	71	0.599279	1.40317	0.001998	0.0132422	Dexamethasone
GO:0045936	negative regulation of phosphate metabolic process	356	0.48974	1.20826	0.001998	0.0132422	Dexamethasone
GO:0046425	regulation of JAK-STAT cascade	61	0.626533	1.46164	0.001998	0.0132422	Dexamethasone
GO:0046427	positive regulation of JAK-STAT cascade	38	0.667037	1.51716	0.001998	0.0132422	Dexamethasone
GO:0046683	response to organophosphorus	60	0.639204	1.48944	0.001998	0.0132422	Dexamethasone
GO:0046718	viral entry into host cell	71	0.604019	1.41427	0.001998	0.0132422	Dexamethasone
GO:0046879	hormone secretion	130	0.559993	1.34766	0.001998	0.0132422	Dexamethasone
GO:0046883	regulation of hormone secretion	108	0.574127	1.37137	0.001998	0.0132422	Dexamethasone
GO:0048015	phosphatidylinositol-mediated signaling	97	0.604509	1.43635	0.001998	0.0132422	Dexamethasone
GO:0048017	inositol lipid-mediated signaling	99	0.5977	1.42159	0.001998	0.0132422	Dexamethasone
GO:0048525	negative regulation of viral process	73	0.603025	1.41456	0.001998	0.0132422	Dexamethasone
GO:0048562	embryonic organ morphogenesis	105	0.592375	1.41339	0.001998	0.0132422	Dexamethasone
GO:0048659	smooth muscle cell proliferation	71	0.645547	1.5115	0.001998	0.0132422	Dexamethasone
GO:0048660	regulation of smooth muscle cell proliferation	70	0.641927	1.50265	0.001998	0.0132422	Dexamethasone
GO:0048754	branching morphogenesis of an epithelial tube	58	0.644933	1.50221	0.001998	0.0132422	Dexamethasone
GO:0048771	tissue remodeling	80	0.612153	1.44049	0.001998	0.0132422	Dexamethasone
GO:0050670	regulation of lymphocyte proliferation	120	0.565895	1.35692	0.001998	0.0132422	Dexamethasone
GO:0050671	positive regulation of lymphocyte proliferation	73	0.610332	1.4317	0.001998	0.0132422	Dexamethasone
GO:0050679	positive regulation of epithelial cell proliferation	83	0.621023	1.46316	0.001998	0.0132422	Dexamethasone
GO:0050730	regulation of peptidyl-tyrosine phosphorylation	118	0.573983	1.37565	0.001998	0.0132422	Dexamethasone
GO:0050731	positive regulation of peptidyl-tyrosine phosphorylation	78	0.600494	1.41137	0.001998	0.0132422	Dexamethasone
GO:0050801	ion homeostasis	373	0.49212	1.21522	0.001998	0.0132422	Dexamethasone
GO:0050804	modulation of chemical synaptic transmission	170	0.549524	1.33553	0.001998	0.0132422	Dexamethasone
GO:0050880	regulation of blood vessel size	46	0.6506	1.49897	0.001998	0.0132422	Dexamethasone
GO:0050920	regulation of chemotaxis	92	0.612152	1.45152	0.001998	0.0132422	Dexamethasone
GO:0051047	positive regulation of secretion	195	0.532377	1.29974	0.001998	0.0132422	Dexamethasone
GO:0051091	positive regulation of DNA-binding transcription factor activity	168	0.541396	1.31554	0.001998	0.0132422	Dexamethasone
GO:0051216	cartilage development	67	0.629875	1.47526	0.001998	0.0132422	Dexamethasone
GO:0051224	negative regulation of protein transport	101	0.607231	1.4456	0.001998	0.0132422	Dexamethasone
GO:0051250	negative regulation of lymphocyte activation	90	0.595931	1.41151	0.001998	0.0132422	Dexamethasone
GO:0051341	regulation of oxidoreductase activity	55	0.64099	1.48816	0.001998	0.0132422	Dexamethasone
GO:0051345	positive regulation of hydrolase activity	475	0.476126	1.18185	0.001998	0.0132422	Dexamethasone
GO:0051402	neuron apoptotic process	133	0.548614	1.32239	0.001998	0.0132422	Dexamethasone
GO:0051607	defense response to virus	176	0.536876	1.306	0.001998	0.0132422	Dexamethasone
GO:0051924	regulation of calcium ion transport	108	0.57007	1.36168	0.001998	0.0132422	Dexamethasone
GO:0051962	positive regulation of nervous system development	243	0.519425	1.27449	0.001998	0.0132422	Dexamethasone
GO:0055080	cation homeostasis	343	0.49274	1.21547	0.001998	0.0132422	Dexamethasone
GO:0060348	bone development	99	0.575288	1.36829	0.001998	0.0132422	Dexamethasone
GO:0060562	epithelial tube morphogenesis	154	0.554125	1.34315	0.001998	0.0132422	Dexamethasone
GO:0061326	renal tubule development	34	0.677954	1.52868	0.001998	0.0132422	Dexamethasone
GO:0061333	renal tubule morphogenesis	28	0.710698	1.58653	0.001998	0.0132422	Dexamethasone
GO:0061448	connective tissue development	106	0.589691	1.40736	0.001998	0.0132422	Dexamethasone
GO:0070301	cellular response to hydrogen peroxide	65	0.61907	1.44665	0.001998	0.0132422	Dexamethasone
GO:0070555	response to interleukin-1	135	0.564575	1.36161	0.001998	0.0132422	Dexamethasone
GO:0070663	regulation of leukocyte proliferation	124	0.57268	1.37527	0.001998	0.0132422	Dexamethasone
GO:0070665	positive regulation of leukocyte proliferation	76	0.616678	1.44715	0.001998	0.0132422	Dexamethasone
GO:0070997	neuron death	206	0.524692	1.28257	0.001998	0.0132422	Dexamethasone
GO:0071236	cellular response to antibiotic	98	0.603592	1.43468	0.001998	0.0132422	Dexamethasone
GO:0071241	cellular response to inorganic substance	117	0.561781	1.34551	0.001998	0.0132422	Dexamethasone
GO:0071347	cellular response to interleukin-1	119	0.56255	1.34857	0.001998	0.0132422	Dexamethasone
GO:0071383	cellular response to steroid hormone stimulus	154	0.556742	1.34949	0.001998	0.0132422	Dexamethasone
GO:0071398	cellular response to fatty acid	29	0.716679	1.60321	0.001998	0.0132422	Dexamethasone
GO:0071496	cellular response to external stimulus	211	0.524265	1.28146	0.001998	0.0132422	Dexamethasone
GO:0071772	response to BMP	65	0.635864	1.4859	0.001998	0.0132422	Dexamethasone
GO:0071773	cellular response to BMP stimulus	65	0.635864	1.4859	0.001998	0.0132422	Dexamethasone
GO:0071887	leukocyte apoptotic process	66	0.64112	1.49985	0.001998	0.0132422	Dexamethasone
GO:0072073	kidney epithelium development	50	0.65358	1.51397	0.001998	0.0132422	Dexamethasone
GO:0072078	nephron tubule morphogenesis	26	0.73563	1.62614	0.001998	0.0132422	Dexamethasone
GO:0072080	nephron tubule development	34	0.677954	1.52868	0.001998	0.0132422	Dexamethasone
GO:0072503	cellular divalent inorganic cation homeostasis	213	0.541789	1.32421	0.001998	0.0132422	Dexamethasone
GO:0090132	epithelium migration	150	0.546024	1.32321	0.001998	0.0132422	Dexamethasone
GO:0090287	regulation of cellular response to growth factor stimulus	117	0.562937	1.34828	0.001998	0.0132422	Dexamethasone
GO:0090288	negative regulation of cellular response to growth factor stimulus	69	0.62222	1.45686	0.001998	0.0132422	Dexamethasone
GO:0097237	cellular response to toxic substance	141	0.579501	1.40115	0.001998	0.0132422	Dexamethasone
GO:0097327	response to antineoplastic agent	64	0.606594	1.4186	0.001998	0.0132422	Dexamethasone
GO:0097485	neuron projection guidance	99	0.588346	1.39934	0.001998	0.0132422	Dexamethasone
GO:0097746	regulation of blood vessel diameter	46	0.6506	1.49897	0.001998	0.0132422	Dexamethasone
GO:0098657	import into cell	444	0.475394	1.17865	0.001998	0.0132422	Dexamethasone
GO:0099177	regulation of trans-synaptic signaling	171	0.546687	1.32916	0.001998	0.0132422	Dexamethasone
GO:1901222	regulation of NIK/NF-kappaB signaling	65	0.609914	1.42525	0.001998	0.0132422	Dexamethasone
GO:1901224	positive regulation of NIK/NF-kappaB signaling	46	0.648337	1.49376	0.001998	0.0132422	Dexamethasone
GO:1903035	negative regulation of response to wounding	29	0.691634	1.54718	0.001998	0.0132422	Dexamethasone
GO:1904892	regulation of STAT cascade	62	0.625224	1.45913	0.001998	0.0132422	Dexamethasone
GO:1904894	positive regulation of STAT cascade	39	0.665182	1.51598	0.001998	0.0132422	Dexamethasone
GO:1904950	negative regulation of establishment of protein localization	103	0.608588	1.45078	0.001998	0.0132422	Dexamethasone
GO:1905330	regulation of morphogenesis of an epithelium	103	0.596124	1.42107	0.001998	0.0132422	Dexamethasone
GO:2000243	positive regulation of reproductive process	27	0.707409	1.5729	0.001998	0.0132422	Dexamethasone
GO:2000377	regulation of reactive oxygen species metabolic process	104	0.596589	1.4232	0.001998	0.0132422	Dexamethasone
GO:0035094	response to nicotine	22	0.765852	1.66746	0.002	0.0132422	Dexamethasone
GO:0060675	ureteric bud morphogenesis	23	0.767351	1.67726	0.002	0.0132422	Dexamethasone
GO:0072171	mesonephric tubule morphogenesis	23	0.767351	1.67726	0.002	0.0132422	Dexamethasone
GO:1904407	positive regulation of nitric oxide metabolic process	22	0.786062	1.71146	0.002	0.0132422	Dexamethasone
GO:2000107	negative regulation of leukocyte apoptotic process	22	0.76496	1.66552	0.002	0.0132422	Dexamethasone
GO:0045429	positive regulation of nitric oxide biosynthetic process	21	0.795523	1.72837	0.00200602	0.0132422	Dexamethasone
GO:0090183	regulation of kidney development	21	0.790035	1.71644	0.00200602	0.0132422	Dexamethasone
GO:0045671	negative regulation of osteoclast differentiation	14	0.859011	1.79507	0.0020429	0.0134603	Dexamethasone
GO:0001659	temperature homeostasis	93	0.559653	1.32747	0.002997	0.0175481	Dexamethasone
GO:0001933	negative regulation of protein phosphorylation	261	0.510451	1.25271	0.002997	0.0175481	Dexamethasone
GO:0002287	alpha-beta T cell activation involved in immune response	42	0.665319	1.5243	0.002997	0.0175481	Dexamethasone
GO:0002293	alpha-beta T cell differentiation involved in immune response	42	0.665319	1.5243	0.002997	0.0175481	Dexamethasone
GO:0002294	CD4-positive, alpha-beta T cell differentiation involved in immune response	42	0.665319	1.5243	0.002997	0.0175481	Dexamethasone
GO:0002440	production of molecular mediator of immune response	129	0.547773	1.3169	0.002997	0.0175481	Dexamethasone
[truncated: 1,485 more rows]
