# Supplementary material for: Diverse environmental perturbations reveal the evolution and context-dependency of genetic effects on gene expression levels
Source: HighWire-hosted journal article supplement (doi:10.1101/gr.276430.121), 2022-10-13
Supplement: Supplemental_Table_S7.xlsx [file Supplemental_Table_S7.xlsx]

## Sheet: Sheet1
Table S7. Results summarized by number of shared cellular environments or treatments (as determined by mashR)
X	Number of genes for which ancestry effects are shared across X environments	Number of genes for which treatments effects are shared across X treatments	Number of eQTL-gene pairs shared across X treatments	Number of genes with eQTL shared across X treatments
0 (no effect in any environment)	5716	2825	8067464	2551
1 (condition-specific)	2	1755	2844	1830
2	0	124	846	701
3	5	1643	720	615
4	19	1034	635	552
5	20	461	538	434
6	1	650	438	385
7	1	380	469	416
8	637	276	966	811
9	232	592	641	577
10	146	281	626	540
11	305	136	822	713
12	3073	NA	32932	6815
