# Supplementary material for: Diverse environmental perturbations reveal the evolution and context-dependency of genetic effects on gene expression levels
Source: HighWire-hosted journal article supplement (doi:10.1101/gr.276430.121), 2022-10-13
Supplement: Supplemental_Table_S8.xlsx [file Supplemental_Table_S8.xlsx]

## Sheet: Sheet1
Table S8. Results summarized by cellular environment
Environment	Sample size	Ancestry-associated genes (limma FDR<10%)	Ancestry-associated genes (mashR LFSR<10%)	eQTL (matrixeQTL FDR<10%)	Genes with eQTL (matrixeQTL FDR<10%)	eQTL (mashR LFSR<10%)	Genes with eQTL (mashR LFSR<10%)	eQTL specific to this condition (mashR LFSR<10%)	Genes with eQTL specific to this condition (mashR LFSR<10%)
ACRYL	120	0	2846	55	32	31151	6275	0	0
BAFF	409	594	4389	5295	1655	35735	6940	25	25
BPA	121	0	2375	50	35	30573	6214	1	1
DEX	448	615	4377	6663	2112	36042	6976	333	287
ETOH	433	670	4396	4959	1359	35740	6927	13	13
FSL-1	203	14	2764	1344	595	32233	6476	893	606
GARD	409	470	4384	3968	1142	35556	6914	12	11
IFNG	424	734	4379	5338	1609	36221	6985	89	73
IGF1	355	397	4376	3332	963	35472	6871	8	7
PFOA	124	0	3091	8	8	30571	6191	1	1
TUNIC	398	469	4393	4956	1500	36003	6978	195	164
H20	442	407	4396	5327	1643	36752	7081	668	501
