# Supplementary material for: Diverse environmental perturbations reveal the evolution and context-dependency of genetic effects on gene expression levels
Source: HighWire-hosted journal article supplement (doi:10.1101/gr.276430.121), 2022-10-13
Supplement: Supplemental_Table_S10.xlsx [file Supplemental_Table_S10.xlsx]

## Sheet: Sheet1
Table S10. Results from analyses testing for enrichment of a given gene set in PTWAS genes (all results with an FDR<20% are reported)
Trait	Fold enrichment	P-value	Q-value	Focal gene set
EGG_Pubertal_growth_10F	5.58798	0	0	Ancestry-associated genes
UKB_20002_1461_self_reported_inflammatory_bowel_disease	5.58798	0	0	Ancestry-associated genes
UKB_6152_7_diagnosed_by_doctor_Blood_clot_in_the_lung	2.48355	0.00190333	0.0653476	Ancestry-associated genes
Astle_et_al_2016_Lymphocyte_counts	1.09454	0.0039688	0.0976157	Ancestry-associated genes
Astle_et_al_2016_Platelet_count	1.07725	0.00577705	0.0976157	Ancestry-associated genes
EGG_BL	3.72532	0.00572785	0.0976157	Ancestry-associated genes
UKB_20002_1462_self_reported_crohns_disease	2.53999	0.00663408	0.0976157	Ancestry-associated genes
UKB_1807_Fathers_age_at_death	1.4657	0.00782214	0.10071	Ancestry-associated genes
Astle_et_al_2016_Monocyte_count	1.0836	0.00923281	0.102978	Ancestry-associated genes
Astle_et_al_2016_Sum_eosinophil_basophil_counts	1.08867	0.00999785	0.102978	Ancestry-associated genes
Astle_et_al_2016_Reticulocyte_count	1.08154	0.0121999	0.114236	Ancestry-associated genes
Astle_et_al_2016_High_light_scatter_reticulocyte_count	1.07736	0.0173564	0.137516	Ancestry-associated genes
MAGNETIC_CH2.DB.ratio	1.95579	0.0170777	0.137516	Ancestry-associated genes
UKB_6152_5_diagnosed_by_doctor_Blood_clot_in_the_leg_DVT	1.54151	0.0225414	0.16584	Ancestry-associated genes
Astle_et_al_2016_Eosinophil_counts	1.07246	0.0254098	0.174481	Ancestry-associated genes
ICBP_SystolicPressure	2.79399	0.0320191	0.192212	Ancestry-associated genes
UKB_20002_1094_self_reported_deep_venous_thrombosis_dvt	1.46147	0.0335905	0.192212	Ancestry-associated genes
UKB_20002_1464_self_reported_rheumatoid_arthritis	1.28249	0.0326991	0.192212	Ancestry-associated genes
UKB_20002_1464_self_reported_rheumatoid_arthritis	2.18801	0.00269056	0.0475115	Treatment-associated genes (Acrylamide)
RA_OKADA_TRANS_ETHNIC	1.47019	0.00628859	0.0756791	Treatment-associated genes (Acrylamide)
Astle_et_al_2016_Platelet_count	1.17242	0.0133	0.11743	Treatment-associated genes (Acrylamide)
UKB_20002_1226_self_reported_hypothyroidism_or_myxoedema	1.27505	0.019762	0.132368	Treatment-associated genes (Acrylamide)
GLGC_Mc_TG	1.44127	0.0234305	0.142583	Treatment-associated genes (Acrylamide)
Astle_et_al_2016_Reticulocyte_count	1.16592	0.0346805	0.16253	Treatment-associated genes (Acrylamide)
IBD.EUR.Ulcerative_Colitis	1.41287	0.0336815	0.16253	Treatment-associated genes (Acrylamide)
IMMUNOBASE_Multiple_sclerosis_hg19	1.42266	0.0452502	0.196619	Treatment-associated genes (Acrylamide)
UKB_20002_1226_self_reported_hypothyroidism_or_myxoedema	1.70998	0.00582231	0.0729646	Treatment-associated genes (BAFF)
RA_OKADA_TRANS_ETHNIC	1.80268	0.0167745	0.127409	Treatment-associated genes (BAFF)
UKB_20022_Birth_weight	1.54713	0.0217673	0.140174	Treatment-associated genes (BAFF)
GIANT_2015_BMI_EUR	1.80412	0.0290152	0.150295	Treatment-associated genes (BAFF)
UKB_20002_1464_self_reported_rheumatoid_arthritis	2.05797	0.00772407	0.0811003	Treatment-associated genes (BPA)
Jones_et_al_2016_Chronotype	2.01395	0.014611	0.122403	Treatment-associated genes (BPA)
Astle_et_al_2016_Reticulocyte_count	1.20585	0.0172207	0.127409	Treatment-associated genes (BPA)
Astle_et_al_2016_Eosinophil_counts	1.14686	0.000586327	0.0247195	Treatment-associated genes (Dexamethasone)
UKB_20002_1226_self_reported_hypothyroidism_or_myxoedema	1.20051	0.000875618	0.0247195	Treatment-associated genes (Dexamethasone)
Astle_et_al_2016_Sum_eosinophil_basophil_counts	1.13936	0.00128393	0.0311745	Treatment-associated genes (Dexamethasone)
Astle_et_al_2016_White_blood_cell_count	1.12404	0.00166126	0.0358545	Treatment-associated genes (Dexamethasone)
Astle_et_al_2016_Lymphocyte_counts	1.11779	0.00303611	0.0491455	Treatment-associated genes (Dexamethasone)
Astle_et_al_2016_Myeloid_white_cell_count	1.10523	0.00990802	0.0986962	Treatment-associated genes (Dexamethasone)
MAGNETIC_CH2.DB.ratio	2.29135	0.0107189	0.104104	Treatment-associated genes (Dexamethasone)
Astle_et_al_2016_Platelet_count	1.08228	0.0125356	0.113254	Treatment-associated genes (Dexamethasone)
IBD.EUR.Inflammatory_Bowel_Disease	1.19198	0.0140318	0.121138	Treatment-associated genes (Dexamethasone)
Astle_et_al_2016_Granulocyte_count	1.09541	0.018245	0.127409	Treatment-associated genes (Dexamethasone)
Astle_et_al_2016_Neutrophil_count	1.09757	0.0178718	0.127409	Treatment-associated genes (Dexamethasone)
Astle_et_al_2016_Sum_neutrophil_eosinophil_counts	1.09505	0.0189693	0.129287	Treatment-associated genes (Dexamethasone)
Astle_et_al_2016_Reticulocyte_count	1.08609	0.0237901	0.142583	Treatment-associated genes (Dexamethasone)
Astle_et_al_2016_Sum_basophil_neutrophil_counts	1.09031	0.0257816	0.145157	Treatment-associated genes (Dexamethasone)
IMMUNOBASE_Multiple_sclerosis_hg19	1.21711	0.0355611	0.16253	Treatment-associated genes (Dexamethasone)
MAGNETIC_HDL.C	1.49031	0.0351735	0.16253	Treatment-associated genes (Dexamethasone)
TAGC_Asthma_EUR	1.24284	0.0370346	0.167297	Treatment-associated genes (Dexamethasone)
Astle_et_al_2016_Eosinophil_counts	1.46472	5.90438e-06	0.00160661	Treatment-associated genes (Gardiquimod)
IMMUNOBASE_Multiple_sclerosis_hg19	2.3487	8.27108e-06	0.00160661	Treatment-associated genes (Gardiquimod)
RA_OKADA_TRANS_ETHNIC	1.88316	1.95502e-05	0.00189876	Treatment-associated genes (Gardiquimod)
UKB_20002_1226_self_reported_hypothyroidism_or_myxoedema	1.63321	1.60397e-05	0.00189876	Treatment-associated genes (Gardiquimod)
Astle_et_al_2016_Lymphocyte_counts	1.39161	4.5894e-05	0.00356586	Treatment-associated genes (Gardiquimod)
IMMUNOBASE_Systemic_lupus_erythematosus_hg19	1.84309	0.0001443	0.00934315	Treatment-associated genes (Gardiquimod)
UKB_20002_1261_self_reported_multiple_sclerosis	2.51874	0.000721464	0.0247195	Treatment-associated genes (Gardiquimod)
UKB_SR_Psoriasis	1.94825	0.000890818	0.0247195	Treatment-associated genes (Gardiquimod)
Astle_et_al_2016_Sum_eosinophil_basophil_counts	1.32358	0.00114311	0.0296056	Treatment-associated genes (Gardiquimod)
Astle_et_al_2016_White_blood_cell_count	1.27404	0.00224609	0.0436289	Treatment-associated genes (Gardiquimod)
UKB_20002_1222_self_reported_type_1_diabetes	2.32071	0.00568618	0.0729646	Treatment-associated genes (Gardiquimod)
IBD.EUR.Crohns_Disease	1.56943	0.00677877	0.0756791	Treatment-associated genes (Gardiquimod)
UKB_20002_1464_self_reported_rheumatoid_arthritis	2.10795	0.00643988	0.0756791	Treatment-associated genes (Gardiquimod)
UKB_20002_1466_self_reported_gout	2.00392	0.0119518	0.113248	Treatment-associated genes (Gardiquimod)
UKB_20002_1452_self_reported_eczema_or_dermatitis	2.0103	0.0148086	0.122403	Treatment-associated genes (Gardiquimod)
UKB_20002_1225_self_reported_hyperthyroidism_or_thyrotoxicosis	1.63782	0.0174993	0.127409	Treatment-associated genes (Gardiquimod)
UKB_6152_9_diagnosed_by_doctor_Hayfever_allergic_rhinitis_or_eczema	1.27382	0.0183659	0.127409	Treatment-associated genes (Gardiquimod)
CARDIoGRAM_C4D_CAD	1.55678	0.02201	0.140174	Treatment-associated genes (Gardiquimod)
IBD.EUR.Inflammatory_Bowel_Disease	1.38927	0.0238564	0.142583	Treatment-associated genes (Gardiquimod)
Astle_et_al_2016_Monocyte_count	1.18895	0.0244945	0.144179	Treatment-associated genes (Gardiquimod)
UKB_20002_1111_self_reported_asthma	1.28359	0.0268484	0.149004	Treatment-associated genes (Gardiquimod)
UKB_6152_8_diagnosed_by_doctor_Asthma	1.27611	0.0306784	0.154782	Treatment-associated genes (Gardiquimod)
TAGC_Asthma_EUR	1.5563	0.034064	0.16253	Treatment-associated genes (Gardiquimod)
IBD.EUR.Ulcerative_Colitis	1.41561	0.0410142	0.181063	Treatment-associated genes (Gardiquimod)
IMMUNOBASE_Multiple_sclerosis_hg19	2.23788	0.000219311	0.0121714	Treatment-associated genes (IFNγ)
Astle_et_al_2016_Eosinophil_counts	1.41757	0.000269865	0.0131049	Treatment-associated genes (IFNγ)
Astle_et_al_2016_Monocyte_count	1.35972	0.000797041	0.0247195	Treatment-associated genes (IFNγ)
Astle_et_al_2016_Reticulocyte_count	1.36697	0.00081921	0.0247195	Treatment-associated genes (IFNγ)
Astle_et_al_2016_High_light_scatter_reticulocyte_count	1.35075	0.00143045	0.032689	Treatment-associated genes (IFNγ)
UKB_20002_1261_self_reported_multiple_sclerosis	2.54933	0.00205953	0.0421107	Treatment-associated genes (IFNγ)
IBD.EUR.Crohns_Disease	1.70899	0.00421165	0.0623219	Treatment-associated genes (IFNγ)
UKB_SR_Psoriasis	1.89476	0.00433138	0.0623219	Treatment-associated genes (IFNγ)
Astle_et_al_2016_Sum_eosinophil_basophil_counts	1.31031	0.00514103	0.0688701	Treatment-associated genes (IFNγ)
UKB_1200_Sleeplessness_or_insomnia	1.56543	0.0168134	0.127409	Treatment-associated genes (IFNγ)
Astle_et_al_2016_Platelet_count	1.18983	0.0228962	0.142583	Treatment-associated genes (IFNγ)
Astle_et_al_2016_Lymphocyte_counts	1.21583	0.0252966	0.14478	Treatment-associated genes (IFNγ)
CARDIoGRAM_C4D_CAD	1.61716	0.0253418	0.14478	Treatment-associated genes (IFNγ)
UKB_20002_1222_self_reported_type_1_diabetes	2.03571	0.0289464	0.150295	Treatment-associated genes (IFNγ)
EGG_BW3_EUR	1.43806	0.0327093	0.16253	Treatment-associated genes (IFNγ)
TAGC_Asthma_EUR	1.63821	0.0339005	0.16253	Treatment-associated genes (IFNγ)
UKB_20002_1226_self_reported_hypothyroidism_or_myxoedema	1.2834	0.0396636	0.177113	Treatment-associated genes (IFNγ)
UKB_20002_1464_self_reported_rheumatoid_arthritis	1.76503	0.0465636	0.198785	Treatment-associated genes (IFNγ)
UKB_20002_1464_self_reported_rheumatoid_arthritis	2.17709	0.00281423	0.0475347	Treatment-associated genes (PFOA)
Astle_et_al_2016_Reticulocyte_count	1.2408	0.0048128	0.0667757	Treatment-associated genes (PFOA)
IMMUNOBASE_Multiple_sclerosis_hg19	1.62788	0.00861119	0.0880355	Treatment-associated genes (PFOA)
Astle_et_al_2016_Platelet_count	1.17409	0.0124363	0.113254	Treatment-associated genes (PFOA)
HRGene_HeartRate	1.9987	0.015196	0.122989	Treatment-associated genes (PFOA)
RA_OKADA_TRANS_ETHNIC	1.38971	0.0172601	0.127409	Treatment-associated genes (PFOA)
MAGNETIC_LDL.C	2.06276	0.0205707	0.135449	Treatment-associated genes (PFOA)
EGG_BW3_EUR	1.37038	0.0283207	0.150295	Treatment-associated genes (PFOA)
MAGNETIC_IDL.TG	2.04311	0.0277918	0.150295	Treatment-associated genes (PFOA)
UKB_20002_1065_self_reported_hypertension	1.15794	0.0288137	0.150295	Treatment-associated genes (PFOA)
Astle_et_al_2016_Lymphocyte_counts	1.16749	0.0305343	0.154782	Treatment-associated genes (PFOA)
UKB_20002_1111_self_reported_asthma	2.54296	0.00250168	0.0462797	Treatment-associated genes (Tunicamycin)
UKB_6152_9_diagnosed_by_doctor_Hayfever_allergic_rhinitis_or_eczema	2.2517	0.00416326	0.0623219	Treatment-associated genes (Tunicamycin)
UKB_20127_Neuroticism_score	2.32793	0.00681814	0.0756791	Treatment-associated genes (Tunicamycin)
UKB_6152_8_diagnosed_by_doctor_Asthma	2.29046	0.00755527	0.0811003	Treatment-associated genes (Tunicamycin)
Astle_et_al_2016_Sum_eosinophil_basophil_counts	1.61771	0.0348828	0.16253	Treatment-associated genes (Tunicamycin)
Astle_et_al_2016_Eosinophil_counts	1.55349	0.0455501	0.196619	Treatment-associated genes (Tunicamycin)
Astle_et_al_2016_Platelet_count	1.1454	2.54959e-06	0.00024731	Context-dependent eQTL genes
UKB_6152_9_diagnosed_by_doctor_Hayfever_allergic_rhinitis_or_eczema	1.15737	0.000849928	0.0412215	Context-dependent eQTL genes
Astle_et_al_2016_Myeloid_white_cell_count	1.09845	0.00553608	0.0861057	Context-dependent eQTL genes
Astle_et_al_2016_Neutrophil_count	1.09584	0.00819621	0.0861057	Context-dependent eQTL genes
Astle_et_al_2016_Reticulocyte_count	1.08859	0.00890958	0.0861057	Context-dependent eQTL genes
Astle_et_al_2016_Sum_basophil_neutrophil_counts	1.09923	0.00654373	0.0861057	Context-dependent eQTL genes
Astle_et_al_2016_Sum_neutrophil_eosinophil_counts	1.09188	0.00976456	0.0861057	Context-dependent eQTL genes
IMMUNOBASE_Multiple_sclerosis_hg19	1.24808	0.00902785	0.0861057	Context-dependent eQTL genes
UKB_20002_1261_self_reported_multiple_sclerosis	1.39551	0.00770086	0.0861057	Context-dependent eQTL genes
UKB_20002_1464_self_reported_rheumatoid_arthritis	1.44446	0.00337131	0.0861057	Context-dependent eQTL genes
UKB_6152_7_diagnosed_by_doctor_Blood_clot_in_the_lung	2.28438	0.00608068	0.0861057	Context-dependent eQTL genes
IBD.EUR.Ulcerative_Colitis	1.20716	0.0129609	0.104767	Context-dependent eQTL genes
Astle_et_al_2016_Granulocyte_count	1.08197	0.0179878	0.134217	Context-dependent eQTL genes
UKB_20002_1461_self_reported_inflammatory_bowel_disease	3.60047	0	0	Ubiquitous eQTL genes
Astle_et_al_2016_Platelet_count	1.10879	1.33e-06	6.4505e-05	Ubiquitous eQTL genes
Astle_et_al_2016_Eosinophil_counts	1.08126	0.0019124	0.0463757	Ubiquitous eQTL genes
UKB_20002_1226_self_reported_hypothyroidism_or_myxoedema	1.11787	0.00148922	0.0463757	Ubiquitous eQTL genes
Astle_et_al_2016_Lymphocyte_counts	1.07443	0.00271419	0.0526553	Ubiquitous eQTL genes
RA_OKADA_TRANS_ETHNIC	1.14717	0.00351577	0.0568382	Ubiquitous eQTL genes
MAGNETIC_CH2.DB.ratio	1.80023	0.00932518	0.12922	Ubiquitous eQTL genes
IMMUNOBASE_Multiple_sclerosis_hg19	1.16412	0.0152222	0.164061	Ubiquitous eQTL genes
UKB_20002_1462_self_reported_crohns_disease	1.96389	0.0139361	0.164061	Ubiquitous eQTL genes
EGG_BL	2.40031	0.0214183	0.207757	Ubiquitous eQTL genes
